# Supplementary material
Source: publisher figshare collection journal article supplement (https://acs.figshare.com/ndownloader/files/26754407)
Supplement: Supplementary file 1 [file 26754407]

## Sheet: S6
	S6. Table S6 The Biological Process (BP) Associated with the Differentially Expressed Proteins in the AD+SMC/AD Group.
	Se-methylselenocysteine (SMC) Improves Cognitive Deficits by Attenuating Synaptic and Metabolic Abnormalities in Alzheimer's Mice Model: A Proteomic Study Xiubo Du1#, Qingqing Shi1#, Yuxi Zhao1, Yongli Xie1, Xuexia Li1, Qiong Liu1, Javed Iqbal1, Huajie Zhang1,2, Xukun Liu1,3, Liming Shen1* 1Shenzhen Key Laboratory of Marine Biotechnology and Ecology, College of Life Science and Oceanography, Shen…
#term ID	Term description	Observed gene count	Background gene count	False discovery rate	Matching proteins
GO:0009987	cellular process	235	12459	4.27e-23	Abat,Acaa1a,Acly,Actn1,Actr3,Adam22,Adh5,Adssl1,Afg3l2,Aldh5a1,Aldoa,Ap1g1,Ap2a1,Ap2b1,Ap2m1,Arl3,Arpc1a,Ass1,Atl3,Atp1a2,Atp1a3,Atp1b1,Atp1b2,Atp1b3,Atp2a2,Atp2b1,Atp2b2,Atp5e,Atp5o,Atp6v1b2,Atp8a2,Blmh,Cadm1,Cadm2,Cadm4,Cadps,Camkv,Cand1,Capn2,Capzb,Cbr1,Cbr3,Cct3,Cct7,Cd9,Cdc42,Celf4,Cfl1,Cfl2,Chordc1,Ckmt1,Cltc,Cnp,Cntnap1,Cops8,Coro1a,Cplx1,Cpne6,Cs,Csrp1,Cst3,Ctbp1,Ctsb,Ctsd,Dctn1,Ddah1,Dla…
GO:0017144	drug metabolic process	45	494	1.87e-21	Acly,Adh5,Adssl1,Aldh5a1,Aldoa,Atp1a2,Atp1b1,Atp5e,Atp5o,Atp6v1b2,Cbr1,Cs,Ddah1,Dlat,Dld,Fah,Gad2,Gbas,Gm10221,Hk1,Hspa8,Idh3g,Mdh2,Mpi,Ndufb8,Ndufv1,Oat,Ogdh,Park7,Pcmt1,Pdha1,Pfkl,Pfkp,Pgam1,Pkm,Prdx5,Prps1,Qdpr,Sdha,Sh3bp1,Suclg1,Tpi1,Uqcrc1,Uqcrh,Vcp
GO:0009117	nucleotide metabolic process	43	488	5.05e-20	Acly,Adssl1,Aldoa,Atp1a2,Atp1b1,Atp2b2,Atp5e,Atp5o,Atp6v1b2,Cnp,Cs,Dlat,Dld,Fasn,Gbas,Gm10221,Gpd1,Gpd1l,Hint1,Hk1,Hspa8,Idh3g,Kcnab2,Mdh2,Mpi,Ndufb8,Ndufv1,Nudt3,Ogdh,Park7,Pdha1,Pfkl,Pfkp,Pgam1,Pkm,Prdx5,Prps1,Sdha,Suclg1,Tpi1,Uqcrc1,Uqcrh,Vcp
GO:0055086	nucleobase-containing small molecule metabolic process	44	566	9e-19	Acly,Adssl1,Aldoa,Atp1a2,Atp1b1,Atp2b2,Atp5e,Atp5o,Atp6v1b2,Cnp,Cs,Dlat,Dld,Fasn,Gbas,Gm10221,Gpd1,Gpd1l,Hint1,Hk1,Hspa8,Idh3g,Kcnab2,Mdh2,Mpi,Ndufb8,Ndufv1,Nudt3,Ogdh,Park7,Pcmt1,Pdha1,Pfkl,Pfkp,Pgam1,Pkm,Prdx5,Prps1,Sdha,Suclg1,Tpi1,Uqcrc1,Uqcrh,Vcp
GO:0044281	small molecule metabolic process	68	1489	3.83e-18	Abat,Acaa1a,Acly,Adh5,Adssl1,Aldh5a1,Aldoa,Ass1,Atp1a2,Atp1b1,Atp2b2,Atp5e,Atp5o,Atp6v1b2,Blmh,Cbr1,Cbr3,Cnp,Cs,Ddah1,Dlat,Dld,Echs1,Etfa,Fah,Fasn,Gad2,Gbas,Glud1,Gm10221,Got2,Gpd1,Gpd1l,Hdlbp,Hint1,Hk1,Hspa8,Idh3g,Itpka,Kcnab2,Mdh2,Mpi,Ndufb8,Ndufv1,Nudt3,Oat,Ogdh,P4hb,Park7,Pcmt1,Pdha1,Pfkl,Pfkp,Pgam1,Pgp,Pkm,Plp1,Prdx5,Prps1,Qdpr,Sdha,Sh3bp1,Suclg1,Tpi1,Uqcrc1,Uqcrh,Vars,Vcp
GO:0009150	purine ribonucleotide metabolic process	35	356	1.32e-17	Acly,Adssl1,Aldoa,Atp1a2,Atp1b1,Atp2b2,Atp5e,Atp5o,Atp6v1b2,Cs,Dlat,Dld,Fasn,Gbas,Gm10221,Hint1,Hk1,Hspa8,Mpi,Ndufb8,Ndufv1,Nudt3,Ogdh,Pdha1,Pfkl,Pfkp,Pgam1,Pkm,Prps1,Sdha,Suclg1,Tpi1,Uqcrc1,Uqcrh,Vcp
GO:0019637	organophosphate metabolic process	48	775	3.91e-17	Acly,Adssl1,Aldh5a1,Aldoa,Atp1a2,Atp1b1,Atp2b2,Atp5e,Atp5o,Atp6v1b2,Cnp,Cs,Dlat,Dld,Efr3b,Fasn,Gbas,Gm10221,Gpd1,Gpd1l,Hint1,Hk1,Hspa8,Idh3g,Itpka,Kcnab2,Mdh2,Mpi,Ndufb8,Ndufv1,Nudt3,Ogdh,Park7,Pdha1,Pfkl,Pfkp,Pgam1,Pgp,Pkm,Prdx5,Prps1,Sdha,Sh3bp1,Suclg1,Tpi1,Uqcrc1,Uqcrh,Vcp
GO:0072521	purine-containing compound metabolic process	36	410	6.53e-17	Acly,Adssl1,Aldoa,Atp1a2,Atp1b1,Atp2b2,Atp5e,Atp5o,Atp6v1b2,Cs,Dlat,Dld,Fasn,Gbas,Gm10221,Hint1,Hk1,Hspa8,Mpi,Ndufb8,Ndufv1,Nudt3,Ogdh,Pcmt1,Pdha1,Pfkl,Pfkp,Pgam1,Pkm,Prps1,Sdha,Suclg1,Tpi1,Uqcrc1,Uqcrh,Vcp
GO:0009167	purine ribonucleoside monophosphate metabolic process	27	196	8.23e-17	Adssl1,Aldoa,Atp1a2,Atp1b1,Atp5e,Atp5o,Atp6v1b2,Dld,Gbas,Gm10221,Hk1,Hspa8,Mpi,Ndufb8,Ndufv1,Nudt3,Ogdh,Pfkl,Pfkp,Pgam1,Pkm,Prps1,Sdha,Tpi1,Uqcrc1,Uqcrh,Vcp
GO:0046034	ATP metabolic process	24	162	1.48e-15	Aldoa,Atp1a2,Atp1b1,Atp5e,Atp5o,Atp6v1b2,Dld,Gbas,Gm10221,Hk1,Hspa8,Mpi,Ndufb8,Ndufv1,Ogdh,Pfkl,Pfkp,Pgam1,Pkm,Sdha,Tpi1,Uqcrc1,Uqcrh,Vcp
GO:0006091	generation of precursor metabolites and energy	29	295	1.05e-14	Adh5,Aldh5a1,Aldoa,Atp5o,Cs,Dlat,Dld,Etfa,Gbas,Glrx5,Gpd1,Hk1,Idh3g,Mdh2,Mpi,Ndufb8,Ndufv1,Ogdh,Pdha1,Pfkl,Pfkp,Pgam1,Pkm,Ppp1cb,Sdha,Suclg1,Tpi1,Uqcrc1,Uqcrh
GO:0051186	cofactor metabolic process	33	403	1.05e-14	Acly,Aldh5a1,Aldoa,Cbr3,Cs,Dlat,Dld,Eef1g,Fasn,Got2,Gpd1,Gpd1l,Gstm5,Hk1,Hpx,Idh3g,Kcnab2,Mdh2,Mpi,Ogdh,Park7,Pcmt1,Pdha1,Pfkl,Pfkp,Pgam1,Pkm,Prdx5,Qdpr,Sh3bp1,Suclg1,Tpi1,Vcp
GO:0072524	pyridine-containing compound metabolic process	20	106	1.23e-14	Aldoa,Dlat,Dld,Gpd1,Gpd1l,Hk1,Idh3g,Kcnab2,Mdh2,Mpi,Ogdh,Pdha1,Pfkl,Pfkp,Pgam1,Pkm,Prdx5,Sh3bp1,Tpi1,Vcp
GO:0006732	coenzyme metabolic process	27	261	3.55e-14	Acly,Aldoa,Cbr3,Cs,Dlat,Dld,Fasn,Gpd1,Gpd1l,Hk1,Idh3g,Kcnab2,Mdh2,Mpi,Ogdh,Pcmt1,Pdha1,Pfkl,Pfkp,Pgam1,Pkm,Prdx5,Qdpr,Sh3bp1,Suclg1,Tpi1,Vcp
GO:0046496	nicotinamide nucleotide metabolic process	19	101	6.28e-14	Aldoa,Dlat,Dld,Gpd1,Gpd1l,Hk1,Idh3g,Kcnab2,Mdh2,Mpi,Ogdh,Pdha1,Pfkl,Pfkp,Pgam1,Pkm,Prdx5,Tpi1,Vcp
GO:0065008	regulation of biological quality	95	3420	4.96e-13	Abat,Actr3,Adh5,Afg3l2,Aldh5a1,Aldoa,Ap2m1,Arpc1a,Ass1,Atp1a2,Atp1a3,Atp1b1,Atp1b2,Atp1b3,Atp2a2,Atp2b1,Atp2b2,Atp8a2,Cadps,Capzb,Cct3,Cct7,Cd9,Cdc42,Celf4,Cfl1,Cfl2,Cnp,Cntnap1,Coro1a,Cplx1,Dctn1,Ddah1,Dld,Dmxl2,Dpysl2,Dstn,Dynll1,Fis1,Gad2,Gdi1,Gfap,Glrx5,Glud1,Gnai2,Gng3,Got2,Gpd1l,Gpm6b,Gria3,Hk1,Hpx,Hsp90ab1,Hspa8,Isoc2a,Itpka,Khsrp,L1cam,Mag,Ncald,Ncdn,Ntrk2,P4hb,Park7,Pebp1,Pfkl,Pfn2,Pin1,…
GO:0016043	cellular component organization	111	4560	5.66e-12	Actn1,Actr3,Afg3l2,Aldh5a1,Aldoa,Ap1g1,Ap2b1,Ap2m1,Arl3,Arpc1a,Atl3,Atp1a3,Atp2a2,Atp2b2,Atp8a2,Cadm1,Cadps,Cand1,Capzb,Cct3,Cd9,Cdc42,Celf4,Cfl1,Cfl2,Cltc,Cnp,Cntnap1,Cops8,Coro1a,Csrp1,Cst3,Ctbp1,Ctsd,Dctn1,Dmxl2,Dnajc11,Dnajc6,Dnm1,Dpysl2,Dpysl3,Dstn,Dync1h1,Dynll1,Dynll2,Eea1,Eef1a1,Elmo2,Fis1,Fscn1,Gdi1,Gfap,Gnao1,Gpm6b,Hsp90ab1,Hspa4,Hspa8,Itpka,Kcnab2,Kpnb1,L1cam,Lgi1,Mag,Ncdn,Ndufb7,Ndufb…
GO:0019752	carboxylic acid metabolic process	39	738	6.63e-12	Abat,Acaa1a,Acly,Adssl1,Aldh5a1,Aldoa,Ass1,Blmh,Cs,Ddah1,Dlat,Dld,Echs1,Etfa,Fah,Fasn,Gad2,Glud1,Got2,Hk1,Idh3g,Mdh2,Mpi,Oat,Ogdh,P4hb,Park7,Pcmt1,Pdha1,Pfkl,Pfkp,Pgam1,Pkm,Plp1,Qdpr,Sdha,Suclg1,Tpi1,Vars
GO:0006796	phosphate-containing compound metabolic process	62	1758	7.21e-12	Acly,Adssl1,Aldh5a1,Aldoa,Atp1a2,Atp1b1,Atp2b2,Atp5e,Atp5o,Atp6v1b2,Camkv,Cfl1,Ckmt1,Cnp,Cs,Dlat,Dld,Dnajc6,Efr3b,Fasn,Gbas,Gm10221,Gpd1,Gpd1l,Hint1,Hk1,Hspa8,Idh3g,Itpka,Kcnab2,Mdh2,Mpi,Ndufb8,Ndufv1,Ntrk2,Nudt3,Ogdh,Park7,Pdha1,Pebp1,Pfkl,Pfkp,Pgam1,Pgp,Pkm,Ppp1cb,Ppp2ca,Ppp2r1a,Ppp3r1,Prdx5,Prkcg,Prps1,Sdha,Sh3bp1,Suclg1,Tpi1,Trf,Trim28,Trio,Uqcrc1,Uqcrh,Vcp
GO:0006082	organic acid metabolic process	40	794	1.21e-11	Abat,Acaa1a,Acly,Adssl1,Aldh5a1,Aldoa,Ass1,Blmh,Cs,Ddah1,Dlat,Dld,Echs1,Etfa,Fah,Fasn,Gad2,Glud1,Got2,Hk1,Idh3g,Mdh2,Mpi,Oat,Ogdh,P4hb,Park7,Pcmt1,Pdha1,Pfkl,Pfkp,Pgam1,Pkm,Plp1,Prps1,Qdpr,Sdha,Suclg1,Tpi1,Vars
GO:0071840	cellular component organization or biogenesis	112	4730	2.29e-11	Actn1,Actr3,Afg3l2,Aldh5a1,Aldoa,Ap1g1,Ap2b1,Ap2m1,Arl3,Arpc1a,Atl3,Atp1a3,Atp2a2,Atp2b2,Atp8a2,Cadm1,Cadps,Cand1,Capzb,Cct3,Cd9,Cdc42,Celf4,Cfl1,Cfl2,Cltc,Cnp,Cntnap1,Cops8,Coro1a,Csrp1,Cst3,Ctbp1,Ctsd,Dctn1,Dmxl2,Dnajc11,Dnajc6,Dnm1,Dpysl2,Dpysl3,Dstn,Dync1h1,Dynll1,Dynll2,Eea1,Eef1a1,Elmo2,Fis1,Fscn1,Gdi1,Gfap,Gnao1,Gpm6b,Hsp90ab1,Hspa4,Hspa8,Itpka,Kcnab2,Kpnb1,L1cam,Lgi1,Mag,Mpi,Ncdn,Ndufb7,N…
GO:0009152	purine ribonucleotide biosynthetic process	19	154	4.03e-11	Acly,Adssl1,Aldoa,Atp5e,Atp5o,Dlat,Dld,Gbas,Gm10221,Hk1,Mpi,Ogdh,Pdha1,Pfkl,Pfkp,Pgam1,Pkm,Prps1,Tpi1
GO:0006810	transport	86	3187	6.95e-11	Afg3l2,Ap1g1,Ap2a1,Ap2a2,Ap2b1,Ap2m1,Ap2s1,Arl3,Atp1a2,Atp1a3,Atp1b1,Atp1b2,Atp1b3,Atp2a2,Atp2b1,Atp2b2,Atp5e,Atp5o,Atp6v1b2,Atp6v1c1,Atp8a2,Cadps,Cct3,Cct7,Cd9,Cdc42,Cfl1,Cltc,Cnp,Coro1a,Cplx1,Dctn1,Dnajc6,Dnm1,Dpysl2,Dync1h1,Dynll1,Dynll2,Eea1,Elmo2,Fis1,Gdi1,Gdi2,Gm10221,Got2,Gpm6b,Gria3,Hdlbp,Hpx,Hspa4,Hspa8,Icam5,Kbp,Kcnab2,Khsrp,Kpnb1,Lgi3,Nsf,Ntrk2,Park7,Ppp3r1,Rab7,Rac1,Rhob,Rims1,Scn2b,S…
GO:0051234	establishment of localization	88	3317	7.98e-11	Actr3,Afg3l2,Ap1g1,Ap2a1,Ap2a2,Ap2b1,Ap2m1,Ap2s1,Arl3,Atp1a2,Atp1a3,Atp1b1,Atp1b2,Atp1b3,Atp2a2,Atp2b1,Atp2b2,Atp5e,Atp5o,Atp6v1b2,Atp6v1c1,Atp8a2,Cadps,Cct3,Cct7,Cd9,Cdc42,Cfl1,Cltc,Cnp,Coro1a,Cplx1,Dctn1,Dnajc6,Dnm1,Dpysl2,Dync1h1,Dynll1,Dynll2,Eea1,Elmo2,Fis1,Gdi1,Gdi2,Gm10221,Got2,Gpm6b,Gria3,Hdlbp,Hk1,Hpx,Hspa4,Hspa8,Icam5,Kbp,Kcnab2,Khsrp,Kpnb1,Lgi3,Nsf,Ntrk2,Park7,Ppp3r1,Rab7,Rac1,Rhob,Rim…
GO:0065007	biological regulation	183	10168	1.22e-10	Abat,Actn1,Actr3,Adh5,Afg3l2,Aldh5a1,Aldoa,Ap1g1,Ap2a1,Ap2a2,Ap2b1,Ap2m1,Arl3,Arpc1a,Ass1,Atl3,Atp1a2,Atp1a3,Atp1b1,Atp1b2,Atp1b3,Atp2a2,Atp2b1,Atp2b2,Atp8a2,C1qb,Cadm1,Cadps,Camkv,Cand1,Capn2,Capzb,Cct3,Cct7,Cd9,Cdc42,Celf4,Cfl1,Cfl2,Chordc1,Cisd1,Ckmt1,Cltc,Cnp,Cntnap1,Cops8,Coro1a,Cplx1,Cpne6,Cst3,Ctbp1,Ctsb,Dctn1,Ddah1,Dld,Dmxl2,Dnaja2,Dnajc6,Dnm1,Dpysl2,Dpysl3,Dstn,Dync1h1,Dynll1,Dynll2,Eef1…
GO:0022607	cellular component assembly	64	2015	1.77e-10	Actn1,Actr3,Aldh5a1,Aldoa,Ap2b1,Ap2m1,Arl3,Atl3,Cadm1,Cadps,Cand1,Capzb,Cct3,Cd9,Cdc42,Celf4,Cfl2,Cltc,Cntnap1,Cops8,Coro1a,Ctsd,Dctn1,Dmxl2,Dnm1,Dpysl3,Dync1h1,Dynll1,Dynll2,Eef1a1,Fis1,Fscn1,Gpm6b,Hsp90ab1,Hspa4,Kcnab2,Kpnb1,Lgi1,Ndufb7,Ndufb8,Ndufs8,Nfasc,Oat,Pfkl,Pfkp,Pkm,Ppp2ca,Ppp2r1a,Psmd4,Ptbp2,Rab7,Rac1,Rapgef2,Rims1,Rps17,Sept7,Sh3bp1,Slc1a2,Synpo,Tppp3,Trim28,Uqcrh,Vbp1,Vcp
GO:1901135	carbohydrate derivative metabolic process	40	882	2.16e-10	Acly,Adssl1,Aldh5a1,Aldoa,Atp1a2,Atp1b1,Atp2b2,Atp5e,Atp5o,Atp6v1b2,Cs,Dlat,Dld,Fasn,Gbas,Gm10221,Gpd1,Gpd1l,Hint1,Hk1,Hspa8,Mpi,Ndufb8,Ndufv1,Nudt3,Ogdh,Park7,Pcmt1,Pdha1,Pfkl,Pfkp,Pgam1,Pkm,Prps1,Sdha,Suclg1,Tpi1,Uqcrc1,Uqcrh,Vcp
GO:0009168	purine ribonucleoside monophosphate biosynthetic process	15	91	2.43e-10	Adssl1,Aldoa,Atp5e,Atp5o,Gbas,Gm10221,Hk1,Mpi,Ogdh,Pfkl,Pfkp,Pgam1,Pkm,Prps1,Tpi1
GO:1901564	organonitrogen compound metabolic process	105	4480	3.05e-10	Abat,Acly,Adam22,Adh5,Adssl1,Afg3l2,Aldh5a1,Aldoa,Ass1,Atp1a2,Atp1b1,Atp2b2,Atp5e,Atp5o,Atp6v1b2,Blmh,C1qb,Camkv,Cand1,Capn2,Cfl1,Cops8,Cs,Ctbp1,Ctsb,Ctsd,Ddah1,Dlat,Dld,Dnajc6,Eef1a1,Eef1a2,Eef1g,Eif3c,Eif3f,Fah,Fasn,Fbxl16,Gad2,Gbas,Glrx5,Glud1,Gm10221,Got2,Gpd1,Gpd1l,Gstm5,Hectd3,Hint1,Hk1,Hpx,Hspa8,Idh3g,Itpka,Kcnab2,Mdh2,Mpi,Ndufb8,Ndufv1,Ntrk2,Nudt3,Oat,Ogdh,P4hb,Park7,Pcbp2,Pcmt1,Pdha1,Peb…
GO:0099131	ATP hydrolysis coupled ion transmembrane transport	13	60	3.2e-10	Atp1a2,Atp1a3,Atp1b1,Atp1b2,Atp1b3,Atp2a2,Atp2b1,Atp2b2,Atp5e,Atp5o,Atp6v1b2,Atp6v1c1,Gm10221
GO:0099132	ATP hydrolysis coupled cation transmembrane transport	13	62	4.42e-10	Atp1a2,Atp1a3,Atp1b1,Atp1b2,Atp1b3,Atp2a2,Atp2b1,Atp2b2,Atp5e,Atp5o,Atp6v1b2,Atp6v1c1,Gm10221
GO:0072350	tricarboxylic acid metabolic process	11	35	4.53e-10	Acly,Ass1,Cs,Dlat,Glud1,Idh3g,Mdh2,Ogdh,Pdha1,Sdha,Suclg1
GO:0032879	regulation of localization	73	2579	6.06e-10	Abat,Actn1,Actr3,Aldoa,Ap1g1,Ap2a1,Ap2b1,Ap2m1,Atp1a2,Atp1b1,Atp1b2,Atp1b3,Atp2a2,Atp2b2,Atp8a2,Cadm1,Cadps,Cct3,Cct7,Cd9,Cdc42,Cfl1,Cltc,Coro1a,Dctn1,Dnajc6,Dnm1,Dpysl2,Dpysl3,Dync1h1,Dynll1,Fis1,Gbas,Gdi1,Gfap,Glud1,Gnai2,Gnao1,Gpd1l,Gpm6b,Hk1,Hpca,Hsp90ab1,Hspa8,Hsph1,Kcnab2,Lgi3,Necab2,Nsf,Ntrk2,Park7,Pfkl,Pfn2,Pin1,Ppp2ca,Prkcg,Rab7,Rac1,Rap2b,Rapgef2,Rhob,Rims1,Scn2b,Sept5,Sh3bp1,Sirpa,Slc1…
GO:0001505	regulation of neurotransmitter levels	23	298	7.25e-10	Abat,Aldh5a1,Ass1,Atp1a2,Atp2a2,Atp2b2,Cadps,Cplx1,Ddah1,Dynll1,Gad2,Gfap,Gpm6b,Hsp90ab1,Khsrp,Ntrk2,Park7,Pebp1,Pfn2,Rims1,Slc1a2,Syn2,Syn3
GO:0051049	regulation of transport	58	1782	7.79e-10	Abat,Actr3,Ap1g1,Ap2a1,Ap2b1,Ap2m1,Atp1a2,Atp1b1,Atp1b2,Atp1b3,Atp2a2,Atp2b2,Atp8a2,Cadm1,Cadps,Cdc42,Cfl1,Coro1a,Dctn1,Dnajc6,Dnm1,Dpysl2,Dync1h1,Dynll1,Fis1,Gbas,Gdi1,Gfap,Glud1,Gnai2,Gnao1,Gpd1l,Gpm6b,Hk1,Hpca,Hsp90ab1,Hspa8,Kcnab2,Lgi3,Necab2,Nsf,Ntrk2,Park7,Pfkl,Pfn2,Ppp2ca,Prkcg,Rab7,Rims1,Scn2b,Sept5,Sirpa,Slc1a2,Slc25a5,Slc8a1,Trf,Trim28,Ywhaq
GO:0043933	protein-containing complex subunit organization	51	1453	1.27e-09	Aldh5a1,Aldoa,Ap2b1,Ap2m1,Atl3,Cadps,Cand1,Cct3,Celf4,Cfl1,Cfl2,Cltc,Cops8,Dmxl2,Dnajc6,Dnm1,Dpysl3,Dstn,Dync1h1,Eef1a1,Fis1,Hsp90ab1,Hspa4,Hspa8,Kcnab2,Lgi1,Ndufb7,Ndufb8,Ndufs8,Nsf,Oat,Pfkl,Pfkp,Pkm,Ppp2ca,Ppp2r1a,Psmd4,Ptbp2,Rac1,Rims1,Rpl23,Rps17,Sept7,Slc1a2,Smarcc2,Tppp3,Trim28,Uqcrh,Vbp1,Vcp,Vipas39
GO:0006754	ATP biosynthetic process	13	70	1.49e-09	Aldoa,Atp5e,Atp5o,Gbas,Gm10221,Hk1,Mpi,Ogdh,Pfkl,Pfkp,Pgam1,Pkm,Tpi1
GO:0044248	cellular catabolic process	48	1321	1.7e-09	Abat,Acaa1a,Adh5,Aldh5a1,Aldoa,Blmh,Capn2,Cbr3,Cltc,Cnp,Ctsb,Ctsd,Ddah1,Echs1,Etfa,Fah,Fis1,Gad2,Glud1,Got2,Gstm5,Hectd3,Hint1,Hk1,Hspa8,Khsrp,Mpi,Nudt3,Ogdh,Pabpc1,Park7,Pcbp2,Pfkl,Pfkp,Pgam1,Pkm,Prdx5,Psma5,Psmd4,Qdpr,Rab7,Sh3bp1,Ssb,Tpi1,Uba1,Uchl1,Usp14,Vcp
GO:0044085	cellular component biogenesis	65	2213	2.31e-09	Actn1,Actr3,Aldh5a1,Aldoa,Ap2b1,Ap2m1,Arl3,Atl3,Cadm1,Cadps,Cand1,Capzb,Cct3,Cd9,Cdc42,Celf4,Cfl2,Cltc,Cntnap1,Cops8,Coro1a,Ctsd,Dctn1,Dmxl2,Dnm1,Dpysl3,Dync1h1,Dynll1,Dynll2,Eef1a1,Fis1,Fscn1,Gpm6b,Hsp90ab1,Hspa4,Kcnab2,Kpnb1,Lgi1,Mpi,Ndufb7,Ndufb8,Ndufs8,Nfasc,Oat,Pfkl,Pfkp,Pkm,Ppp2ca,Ppp2r1a,Psmd4,Ptbp2,Rab7,Rac1,Rapgef2,Rims1,Rps17,Sept7,Sh3bp1,Slc1a2,Synpo,Tppp3,Trim28,Uqcrh,Vbp1,Vcp
GO:0043648	dicarboxylic acid metabolic process	14	92	2.54e-09	Acly,Adssl1,Aldh5a1,Ass1,Cs,Dld,Gad2,Glud1,Got2,Idh3g,Mdh2,Ogdh,Sdha,Suclg1
GO:0007399	nervous system development	64	2181	3.44e-09	Abat,Actr3,Adam22,Afg3l2,Aldh5a1,Ap2a1,Arl3,Atp1a3,Atp2b1,Atp2b2,Atp8a2,Cadm1,Capzb,Cd9,Cdc42,Cfl1,Cnp,Cntnap1,Cpne6,Cst3,Dctn1,Dpysl2,Dpysl3,Eef1a1,Gdi1,Gfap,Glud1,Gnao1,Hpca,Hsp90ab1,Itpka,Kbp,L1cam,Lgi1,Mag,Ncdn,Nfasc,Ntm,Ntrk2,Ogdh,Pebp1,Pin1,Plp1,Ppp3r1,Prkcg,Prps1,Ptbp2,Rac1,Rapgef2,Rims1,Scn2b,Sdha,Sept7,Sipa1l1,Slc1a2,Slc32a1,Slc6a17,Smarcc2,Trf,Tubb3,Ube2v2,Uchl1,Vcan,Ywhag
GO:0055114	oxidation-reduction process	38	898	3.99e-09	Acaa1a,Adh5,Aldh5a1,Cbr1,Cbr3,Cs,Ctbp1,Dlat,Dld,Echs1,Etfa,Fasn,Gfod1,Glrx5,Glud1,Gpd1,Gpd1l,Hk1,Idh3g,Kcnab2,Mdh2,Ndufb7,Ndufb8,Ndufs8,Ndufv1,Ogdh,P4hb,Park7,Pdha1,Ppp1cb,Prdx5,Qdpr,Sdha,Selenbp1,Suclg1,Uqcrc1,Uqcrh,Vat1
GO:0006090	pyruvate metabolic process	12	62	5.21e-09	Aldoa,Dlat,Dld,Hk1,Mpi,Ogdh,Pdha1,Pfkl,Pfkp,Pgam1,Pkm,Tpi1
GO:0009056	catabolic process	50	1478	6.25e-09	Abat,Acaa1a,Adh5,Aldh5a1,Aldoa,Blmh,Capn2,Cbr3,Cltc,Cnp,Ctsb,Ctsd,Ddah1,Echs1,Etfa,Fah,Fis1,Gad2,Glud1,Got2,Gpd1,Gpd1l,Gstm5,Hectd3,Hint1,Hk1,Hspa8,Khsrp,Mpi,Nudt3,Ogdh,Pabpc1,Park7,Pcbp2,Pfkl,Pfkp,Pgam1,Pkm,Prdx5,Psma5,Psmd4,Qdpr,Rab7,Sh3bp1,Ssb,Tpi1,Uba1,Uchl1,Usp14,Vcp
GO:0007010	cytoskeleton organization	38	916	6.45e-09	Actn1,Actr3,Ap1g1,Arpc1a,Atp8a2,Capzb,Cdc42,Cfl1,Cfl2,Cltc,Cnp,Cntnap1,Coro1a,Csrp1,Dctn1,Dpysl2,Dpysl3,Dstn,Dync1h1,Elmo2,Fscn1,Gfap,Itpka,Kpnb1,Pfn2,Ppp2r1a,Rac1,Sept7,Sh3bp1,Sipa1l1,Sirpa,Synpo,Tmsb4x,Tppp3,Trf,Tuba4a,Tuba8,Tubb3
GO:0044283	small molecule biosynthetic process	27	481	8.19e-09	Abat,Acly,Aldoa,Ass1,Cnp,Fasn,Glud1,Got2,Gpd1,Hint1,Hk1,Itpka,Mpi,Nudt3,Oat,Ogdh,Park7,Pfkl,Pfkp,Pgam1,Pgp,Pkm,Plp1,Prps1,Qdpr,Tpi1,Vcp
GO:0046434	organophosphate catabolic process	16	147	8.51e-09	Aldoa,Cnp,Gpd1,Gpd1l,Hint1,Hk1,Mpi,Nudt3,Ogdh,Pfkl,Pfkp,Pgam1,Pkm,Sh3bp1,Tpi1,Vcp
GO:0051179	localization	98	4315	1.03e-08	Actr3,Afg3l2,Anks1b,Ap1g1,Ap2a1,Ap2a2,Ap2b1,Ap2m1,Ap2s1,Arl3,Atp1a2,Atp1a3,Atp1b1,Atp1b2,Atp1b3,Atp2a2,Atp2b1,Atp2b2,Atp5e,Atp5o,Atp6v1b2,Atp6v1c1,Atp8a2,Bsg,Cadps,Cct3,Cct7,Cd9,Cdc42,Cfl1,Cltc,Cnp,Cntnap1,Coro1a,Cplx1,Dctn1,Dnajc6,Dnm1,Dpysl2,Dync1h1,Dynll1,Dynll2,Eea1,Efr3b,Elmo2,Fis1,Fscn1,Gdi1,Gdi2,Gm10221,Got2,Gpm6b,Gria3,Hdlbp,Hk1,Hpx,Hspa4,Hspa8,Icam5,Kbp,Kcnab2,Khsrp,Kpnb1,L1cam,Lgi3,Nfas…
GO:0051128	regulation of cellular component organization	65	2337	1.79e-08	Actr3,Aldoa,Ap2a1,Ap2b1,Ap2m1,Arpc1a,Atl3,Atp8a2,Cand1,Capn2,Capzb,Cct3,Cct7,Cdc42,Cfl1,Cfl2,Chordc1,Cltc,Coro1a,Cpne6,Cst3,Ctbp1,Dctn1,Dnajc6,Dnm1,Dpysl2,Dpysl3,Dstn,Dync1h1,Dynll1,Eef1a1,Fis1,Fscn1,Gdi1,Gfap,Gpm6b,Hspa1b,Hspa8,Hsph1,Itpka,L1cam,Lgi1,Mag,Necab2,Nsf,Ntm,Ntrk2,Pebp1,Pfn2,Pin1,Prkcg,Rac1,Rapgef2,Rims1,Sept7,Sh3bp1,Sipa1l1,Sirpa,Slc25a5,Synpo,Trf,Trim28,Ube2v2,Vat1,Vcp
GO:0009166	nucleotide catabolic process	13	90	1.89e-08	Aldoa,Cnp,Hint1,Hk1,Mpi,Nudt3,Ogdh,Pfkl,Pfkp,Pgam1,Pkm,Tpi1,Vcp
GO:0051130	positive regulation of cellular component organization	43	1197	2.31e-08	Actr3,Ap2a1,Ap2b1,Ap2m1,Arpc1a,Atl3,Atp8a2,Cand1,Cct3,Cct7,Cdc42,Cfl1,Cfl2,Cpne6,Ctbp1,Dctn1,Dnm1,Dpysl3,Dstn,Dync1h1,Dynll1,Eef1a1,Fis1,Fscn1,Gdi1,Hspa1b,Hspa8,Itpka,L1cam,Ntrk2,Pebp1,Pfn2,Rac1,Rapgef2,Rims1,Sept7,Sh3bp1,Sirpa,Synpo,Trf,Trim28,Ube2v2,Vcp
GO:0098657	import into cell	27	516	3.16e-08	Ap2a1,Ap2a2,Ap2b1,Ap2m1,Ap2s1,Atp1a2,Atp1a3,Atp1b1,Atp1b2,Atp1b3,Cd9,Cdc42,Cltc,Coro1a,Dnajc6,Dnm1,Dpysl2,Eea1,Elmo2,Icam5,Park7,Rab7,Rac1,Sh3bp1,Sirpa,Slc1a2,Slc8a1
GO:0051649	establishment of localization in cell	44	1260	3.22e-08	Actr3,Ap1g1,Ap2a1,Ap2a2,Ap2b1,Ap2m1,Ap2s1,Arl3,Atp2a2,Atp5o,Cadps,Cdc42,Cfl1,Cltc,Coro1a,Cplx1,Dctn1,Dnajc6,Dnm1,Dpysl2,Dync1h1,Dynll1,Dynll2,Fis1,Hspa4,Hspa8,Kpnb1,Nsf,Park7,Ppp3r1,Rab7,Rhob,Rims1,Slc32a1,Slc8a1,Ssb,Syn2,Syn3,Syngr1,Uchl1,Vcp,Vipas39,Ywhag,Ywhaq
GO:0045333	cellular respiration	15	140	3.45e-08	Aldh5a1,Cs,Dlat,Dld,Gpd1,Idh3g,Mdh2,Ndufb8,Ndufv1,Ogdh,Pdha1,Sdha,Suclg1,Uqcrc1,Uqcrh
GO:0006101	citrate metabolic process	9	31	4.46e-08	Acly,Cs,Dlat,Idh3g,Mdh2,Ogdh,Pdha1,Sdha,Suclg1
GO:1901575	organic substance catabolic process	44	1276	4.48e-08	Acaa1a,Adh5,Aldh5a1,Aldoa,Blmh,Capn2,Cbr3,Cnp,Ctsb,Ctsd,Ddah1,Echs1,Etfa,Fah,Gad2,Glud1,Got2,Gpd1,Gpd1l,Hectd3,Hint1,Hk1,Hspa8,Khsrp,Mpi,Nudt3,Ogdh,Pabpc1,Pcbp2,Pfkl,Pfkp,Pgam1,Pkm,Psma5,Psmd4,Qdpr,Rab7,Sh3bp1,Ssb,Tpi1,Uba1,Uchl1,Usp14,Vcp
GO:0051641	cellular localization	54	1792	4.7e-08	Actr3,Anks1b,Ap1g1,Ap2a1,Ap2a2,Ap2b1,Ap2m1,Ap2s1,Arl3,Atp1b1,Atp1b3,Atp2a2,Atp5o,Bsg,Cadps,Cdc42,Cfl1,Cltc,Cntnap1,Coro1a,Cplx1,Dctn1,Dnajc6,Dnm1,Dpysl2,Dync1h1,Dynll1,Dynll2,Efr3b,Fis1,Hk1,Hspa4,Hspa8,Kpnb1,Nfasc,Nsf,Park7,Ppp3r1,Rab7,Rac1,Rapgef2,Rhob,Rims1,Slc32a1,Slc8a1,Ssb,Syn2,Syn3,Syngr1,Uchl1,Vcp,Vipas39,Ywhag,Ywhaq
GO:0097435	supramolecular fiber organization	23	384	5.06e-08	Actn1,Actr3,Arpc1a,Cdc42,Cfl1,Cfl2,Coro1a,Cst3,Dctn1,Dpysl3,Dstn,Dync1h1,Fscn1,Gfap,Hsp90ab1,Kpnb1,Rac1,Sh3bp1,Sirpa,Tmsb4x,Tppp3,Trf,Vipas39
GO:0009108	coenzyme biosynthetic process	14	130	1.1e-07	Acly,Aldoa,Dlat,Dld,Hk1,Mpi,Ogdh,Pdha1,Pfkl,Pfkp,Pgam1,Pkm,Qdpr,Tpi1
GO:0016999	antibiotic metabolic process	13	107	1.1e-07	Acly,Adh5,Aldh5a1,Cs,Dlat,Idh3g,Mdh2,Ogdh,Park7,Pdha1,Prdx5,Sdha,Suclg1
GO:0051050	positive regulation of transport	37	987	1.28e-07	Abat,Actr3,Ap1g1,Ap2a1,Ap2b1,Ap2m1,Atp1b1,Atp1b2,Atp1b3,Atp2b2,Atp8a2,Cadm1,Cadps,Cdc42,Cfl1,Dctn1,Dnm1,Dpysl2,Dync1h1,Dynll1,Fis1,Gbas,Glud1,Gnai2,Gpd1l,Hk1,Hpca,Hsp90ab1,Hspa8,Park7,Rab7,Rims1,Sept5,Sirpa,Slc1a2,Trf,Trim28
GO:0006096	glycolytic process	9	37	1.54e-07	Aldoa,Hk1,Mpi,Ogdh,Pfkl,Pfkp,Pgam1,Pkm,Tpi1
GO:0006757	ATP generation from ADP	9	37	1.54e-07	Aldoa,Hk1,Mpi,Ogdh,Pfkl,Pfkp,Pgam1,Pkm,Tpi1
GO:0050789	regulation of biological process	166	9594	1.65e-07	Abat,Actn1,Actr3,Afg3l2,Aldoa,Ap1g1,Ap2a1,Ap2a2,Ap2b1,Ap2m1,Arl3,Arpc1a,Ass1,Atl3,Atp1a2,Atp1a3,Atp1b1,Atp1b2,Atp1b3,Atp2a2,Atp2b2,Atp8a2,C1qb,Cadm1,Cadps,Camkv,Cand1,Capn2,Capzb,Cct3,Cct7,Cd9,Cdc42,Celf4,Cfl1,Cfl2,Chordc1,Cisd1,Ckmt1,Cltc,Cops8,Coro1a,Cpne6,Cst3,Ctbp1,Ctsb,Dctn1,Ddah1,Dld,Dnajc6,Dnm1,Dpysl2,Dpysl3,Dstn,Dync1h1,Dynll1,Eef1a1,Eef1a2,Eif3c,Fis1,Fscn1,Gbas,Gdi1,Gdi2,Gfap,Glg1,Glrx5,…
GO:0006099	tricarboxylic acid cycle	8	27	3.02e-07	Cs,Dlat,Idh3g,Mdh2,Ogdh,Pdha1,Sdha,Suclg1
GO:0046394	carboxylic acid biosynthetic process	18	256	3.08e-07	Abat,Acly,Aldoa,Ass1,Fasn,Glud1,Got2,Hk1,Mpi,Oat,Ogdh,Park7,Pfkl,Pfkp,Pgam1,Pkm,Plp1,Tpi1
GO:0015980	energy derivation by oxidation of organic compounds	16	197	3.19e-07	Aldh5a1,Cs,Dlat,Dld,Gpd1,Idh3g,Mdh2,Ndufb8,Ndufv1,Ogdh,Pdha1,Ppp1cb,Sdha,Suclg1,Uqcrc1,Uqcrh
GO:0042866	pyruvate biosynthetic process	9	41	3.19e-07	Aldoa,Hk1,Mpi,Ogdh,Pfkl,Pfkp,Pgam1,Pkm,Tpi1
GO:0036376	sodium ion export across plasma membrane	6	8	3.22e-07	Atp1a2,Atp1a3,Atp1b1,Atp1b2,Atp1b3,Slc8a1
GO:0046907	intracellular transport	37	1032	3.6e-07	Ap1g1,Ap2a1,Ap2a2,Ap2b1,Ap2m1,Ap2s1,Arl3,Atp2a2,Atp5o,Cadps,Cdc42,Cfl1,Cltc,Coro1a,Cplx1,Dctn1,Dnm1,Dpysl2,Dync1h1,Dynll1,Dynll2,Fis1,Hspa4,Hspa8,Kpnb1,Nsf,Ppp3r1,Rab7,Rhob,Rims1,Ssb,Syngr1,Uchl1,Vcp,Vipas39,Ywhag,Ywhaq
GO:0032501	multicellular organismal process	116	5888	3.69e-07	Abat,Actn1,Actr3,Adam22,Adh5,Afg3l2,Aldh5a1,Aldoa,Ap2a1,Ap2b1,Arl3,Ass1,Atp1a2,Atp1a3,Atp1b1,Atp2a2,Atp2b1,Atp2b2,Atp8a2,Bsg,C1qb,Cadm1,Capn2,Capzb,Cbr3,Cd9,Cdc42,Cfl1,Cfl2,Cnp,Cntnap1,Coro1a,Cpne6,Cst3,Ctsb,Dctn1,Ddah1,Dlat,Dld,Dnm1,Dpysl2,Dpysl3,Eef1a1,Fasn,Gdi1,Gfap,Glg1,Glrx5,Glud1,Gnai2,Gnao1,Got2,Gpd1l,Gpm6b,Gria3,Hpca,Hsp90ab1,Itpka,Kbp,Kcnab2,L1cam,Lgi1,Lxn,Mag,N28178,Ncald,Ncdn,Nfasc,Ntm…
GO:0065003	protein-containing complex assembly	42	1292	4.91e-07	Aldh5a1,Aldoa,Ap2b1,Ap2m1,Atl3,Cadps,Cand1,Cct3,Celf4,Cltc,Cops8,Dmxl2,Dnm1,Dpysl3,Dync1h1,Eef1a1,Fis1,Hsp90ab1,Hspa4,Kcnab2,Lgi1,Ndufb7,Ndufb8,Ndufs8,Oat,Pfkl,Pfkp,Pkm,Ppp2ca,Ppp2r1a,Psmd4,Ptbp2,Rac1,Rims1,Rps17,Sept7,Slc1a2,Tppp3,Trim28,Uqcrh,Vbp1,Vcp
GO:0050794	regulation of cellular process	157	9045	6.72e-07	Abat,Actn1,Actr3,Aldoa,Ap1g1,Ap2a1,Ap2a2,Ap2b1,Ap2m1,Arl3,Arpc1a,Ass1,Atl3,Atp1a2,Atp1a3,Atp1b1,Atp1b2,Atp1b3,Atp2a2,Atp2b2,Atp8a2,Cadm1,Cadps,Camkv,Cand1,Capn2,Capzb,Cct3,Cct7,Cd9,Cdc42,Celf4,Cfl1,Cfl2,Chordc1,Cisd1,Ckmt1,Cltc,Cops8,Coro1a,Cpne6,Cst3,Ctbp1,Ctsb,Dctn1,Ddah1,Dld,Dnajc6,Dnm1,Dpysl2,Dpysl3,Dstn,Dync1h1,Dynll1,Eef1a1,Eef1a2,Eif3c,Fis1,Fscn1,Gdi1,Gdi2,Gfap,Glg1,Glrx5,Glud1,Gnai2,Gnao1…
GO:0048518	positive regulation of biological process	107	5340	8.62e-07	Abat,Actn1,Actr3,Aldoa,Ap1g1,Ap2a1,Ap2b1,Ap2m1,Arpc1a,Ass1,Atl3,Atp1b1,Atp1b2,Atp1b3,Atp2b2,Atp8a2,C1qb,Cadm1,Cadps,Cand1,Cct3,Cct7,Cdc42,Celf4,Cfl1,Cfl2,Cops8,Coro1a,Cpne6,Cst3,Ctbp1,Dctn1,Ddah1,Dnm1,Dpysl2,Dpysl3,Dstn,Dync1h1,Dynll1,Eef1a1,Eef1a2,Eif3c,Fis1,Fscn1,Gbas,Gdi1,Gfap,Glud1,Gnai2,Gpd1,Gpd1l,Gpm6b,Hint1,Hk1,Hnrnpl,Hpca,Hpx,Hsp90ab1,Hspa1b,Hspa4,Hspa8,Hsph1,Itpka,Khsrp,L1cam,Lgi1,Mag,Ma…
GO:0006734	NADH metabolic process	7	20	9.21e-07	Gpd1,Gpd1l,Hk1,Idh3g,Mdh2,Ogdh,Vcp
GO:0019439	aromatic compound catabolic process	19	312	9.29e-07	Aldoa,Cnp,Fah,Hint1,Hk1,Khsrp,Mpi,Nudt3,Ogdh,Pabpc1,Pfkl,Pfkp,Pgam1,Pkm,Qdpr,Sh3bp1,Ssb,Tpi1,Vcp
GO:0044282	small molecule catabolic process	18	279	9.45e-07	Acaa1a,Adh5,Aldh5a1,Blmh,Cbr3,Ddah1,Echs1,Etfa,Fah,Gad2,Glud1,Got2,Hk1,Mpi,Nudt3,Qdpr,Sh3bp1,Tpi1
GO:0007015	actin filament organization	15	192	1.33e-06	Actn1,Actr3,Arpc1a,Cdc42,Cfl1,Cfl2,Coro1a,Dpysl3,Dstn,Fscn1,Rac1,Sh3bp1,Sirpa,Tmsb4x,Trf
GO:0072330	monocarboxylic acid biosynthetic process	14	164	1.35e-06	Abat,Acly,Aldoa,Fasn,Hk1,Mpi,Ogdh,Park7,Pfkl,Pfkp,Pgam1,Pkm,Plp1,Tpi1
GO:0060341	regulation of cellular localization	31	811	1.44e-06	Actr3,Ap2b1,Ap2m1,Atp2a2,Cct3,Cct7,Cdc42,Cfl1,Cltc,Coro1a,Dctn1,Dnm1,Dync1h1,Dynll1,Fis1,Gdi1,Gpd1l,Gpm6b,Hpca,Hsp90ab1,Hsph1,Kcnab2,Necab2,Ntrk2,Park7,Pfn2,Pin1,Ppp2ca,Rims1,Slc8a1,Trim28
GO:0009060	aerobic respiration	10	71	1.73e-06	Cs,Dlat,Idh3g,Mdh2,Ogdh,Pdha1,Sdha,Suclg1,Uqcrc1,Uqcrh
GO:0050804	modulation of chemical synaptic transmission	20	367	2.09e-06	Abat,Atp2a2,Atp2b2,Celf4,Cfl1,Gfap,Gnai2,Itpka,Lgi1,N28178,Ncdn,Ntrk2,Pfn2,Rac1,Rapgef2,Rims1,Sipa1l1,Syngr1,Synpo,Ywhag
GO:0019359	nicotinamide nucleotide biosynthetic process	9	54	2.16e-06	Aldoa,Hk1,Mpi,Ogdh,Pfkl,Pfkp,Pgam1,Pkm,Tpi1
GO:1901361	organic cyclic compound catabolic process	19	339	2.79e-06	Aldoa,Cnp,Fah,Hint1,Hk1,Khsrp,Mpi,Nudt3,Ogdh,Pabpc1,Pfkl,Pfkp,Pgam1,Pkm,Qdpr,Sh3bp1,Ssb,Tpi1,Vcp
GO:0006883	cellular sodium ion homeostasis	6	14	3.08e-06	Atp1a2,Atp1a3,Atp1b1,Atp1b2,Atp1b3,Slc8a1
GO:0032787	monocarboxylic acid metabolic process	21	426	4.44e-06	Abat,Acaa1a,Acly,Aldh5a1,Aldoa,Dlat,Dld,Echs1,Etfa,Fasn,Hk1,Mpi,Ogdh,Park7,Pdha1,Pfkl,Pfkp,Pgam1,Pkm,Plp1,Tpi1
GO:0030029	actin filament-based process	22	466	4.47e-06	Actn1,Actr3,Arpc1a,Capzb,Cdc42,Cfl1,Cfl2,Coro1a,Csrp1,Dpysl3,Dstn,Fscn1,Gpd1l,Itpka,Pfn2,Rac1,Scn2b,Sh3bp1,Sipa1l1,Sirpa,Tmsb4x,Trf
GO:0006996	organelle organization	66	2805	4.79e-06	Actn1,Actr3,Afg3l2,Ap1g1,Ap2m1,Arl3,Arpc1a,Atl3,Atp2a2,Atp2b2,Atp8a2,Cadps,Capzb,Cdc42,Cfl1,Cfl2,Cltc,Cnp,Cntnap1,Coro1a,Csrp1,Ctbp1,Ctsd,Dctn1,Dnajc11,Dnm1,Dpysl2,Dpysl3,Dstn,Dync1h1,Dynll1,Dynll2,Eea1,Elmo2,Fis1,Fscn1,Gfap,Hsp90ab1,Hspa4,Hspa8,Itpka,Kpnb1,Ndufb7,Ndufb8,Ndufs8,Park7,Pfn2,Ppp2r1a,Rab7,Rac1,Rps17,Sept7,Sh3bp1,Sipa1l1,Sirpa,Slc25a5,Smarcc2,Synpo,Tardbp,Tmsb4x,Tppp3,Trf,Trim28,Tuba4…
GO:0090407	organophosphate biosynthetic process	20	394	5.51e-06	Acly,Adssl1,Aldoa,Atp5e,Atp5o,Dlat,Dld,Gbas,Gm10221,Hk1,Itpka,Mpi,Ogdh,Pdha1,Pfkl,Pfkp,Pgam1,Pkm,Prps1,Tpi1
GO:0009064	glutamine family amino acid metabolic process	9	62	5.57e-06	Adssl1,Aldh5a1,Ass1,Ddah1,Fah,Gad2,Glud1,Got2,Oat
GO:0034655	nucleobase-containing compound catabolic process	16	257	7.34e-06	Aldoa,Cnp,Hint1,Hk1,Khsrp,Mpi,Nudt3,Ogdh,Pabpc1,Pfkl,Pfkp,Pgam1,Pkm,Ssb,Tpi1,Vcp
GO:1903827	regulation of cellular protein localization	22	484	7.98e-06	Actr3,Ap2b1,Ap2m1,Cct3,Cct7,Cdc42,Cfl1,Cltc,Dctn1,Fis1,Gdi1,Gpd1l,Gpm6b,Hpca,Hsp90ab1,Hsph1,Kcnab2,Necab2,Park7,Pin1,Ppp2ca,Trim28
GO:0048522	positive regulation of cellular process	96	4827	8.47e-06	Abat,Actn1,Actr3,Aldoa,Ap1g1,Ap2a1,Ap2b1,Ap2m1,Arpc1a,Ass1,Atl3,Atp1b1,Atp1b2,Atp1b3,Atp8a2,Cadm1,Cadps,Cand1,Cct3,Cct7,Cdc42,Celf4,Cfl1,Cfl2,Cops8,Coro1a,Cpne6,Cst3,Ctbp1,Dctn1,Ddah1,Dnm1,Dpysl2,Dpysl3,Dstn,Dync1h1,Dynll1,Eef1a1,Eef1a2,Eif3c,Fis1,Fscn1,Gdi1,Gfap,Glud1,Gnai2,Gpd1,Hint1,Hk1,Hnrnpl,Hpx,Hsp90ab1,Hspa1b,Hspa8,Hsph1,Itpka,Khsrp,L1cam,Lgi1,Mag,Mapre3,Necab2,Nsf,Ntrk2,Pabpc1,Park7,Pebp1…
GO:0007417	central nervous system development	31	892	9.1e-06	Abat,Actr3,Aldh5a1,Atp1a3,Atp2b1,Atp2b2,Cd9,Cfl1,Cnp,Cntnap1,Cst3,Dctn1,Dpysl2,Gfap,Glud1,Gnao1,Hpca,Hsp90ab1,Mag,Ntrk2,Ogdh,Pebp1,Plp1,Ptbp2,Rac1,Rapgef2,Slc1a2,Slc32a1,Slc6a17,Smarcc2,Vcan
GO:0006886	intracellular protein transport	25	616	9.11e-06	Ap1g1,Ap2a1,Ap2a2,Ap2b1,Ap2m1,Ap2s1,Arl3,Cfl1,Cltc,Dynll1,Fis1,Hspa4,Hspa8,Kpnb1,Nsf,Ppp3r1,Rab7,Rhob,Rims1,Ssb,Syngr1,Vcp,Vipas39,Ywhag,Ywhaq
GO:0044270	cellular nitrogen compound catabolic process	17	297	9.16e-06	Aldoa,Cnp,Hint1,Hk1,Khsrp,Mpi,Nudt3,Ogdh,Pabpc1,Pfkl,Pfkp,Pgam1,Pkm,Sh3bp1,Ssb,Tpi1,Vcp
GO:0030036	actin cytoskeleton organization	20	412	1.02e-05	Actn1,Actr3,Arpc1a,Capzb,Cdc42,Cfl1,Cfl2,Coro1a,Csrp1,Dpysl3,Dstn,Fscn1,Itpka,Pfn2,Rac1,Sh3bp1,Sipa1l1,Sirpa,Tmsb4x,Trf
GO:0046700	heterocycle catabolic process	17	300	1.03e-05	Aldoa,Cnp,Hint1,Hk1,Khsrp,Mpi,Nudt3,Ogdh,Pabpc1,Pfkl,Pfkp,Pgam1,Pkm,Sh3bp1,Ssb,Tpi1,Vcp
GO:0008152	metabolic process	141	8164	1.12e-05	Abat,Acaa1a,Acly,Adam22,Adh5,Adssl1,Afg3l2,Aldh5a1,Aldoa,Ap2b1,Ap2m1,Ass1,Atp1a2,Atp1b1,Atp2b2,Atp5e,Atp5o,Atp6v1b2,Blmh,C1qb,Camkv,Cand1,Capn2,Cbr1,Cbr3,Cd9,Celf4,Cfl1,Ckmt1,Cltc,Cnp,Cops8,Cs,Ctbp1,Ctsb,Ctsd,Ddah1,Dip2b,Dlat,Dld,Dnajc6,Dnm1,Dynll1,Echs1,Eef1a1,Eef1a2,Eef1g,Efr3b,Eif3c,Eif3f,Etfa,Fah,Fahd2a,Fasn,Fbxl16,Fis1,Gad2,Gbas,Gfod1,Glrx5,Glud1,Gm10221,Got2,Gpd1,Gpd1l,Gstm5,Hdlbp,Hectd3,Hi…
GO:0032502	developmental process	101	5213	1.15e-05	Abat,Actn1,Actr3,Adam22,Afg3l2,Aldh5a1,Ap1g1,Ap2a1,Ap2b1,Arl3,Ass1,Atp1a3,Atp2a2,Atp2b1,Atp2b2,Atp8a2,Bsg,C1qb,Cadm1,Cand1,Capn2,Capzb,Cd9,Cdc42,Cfl1,Cfl2,Cnp,Cntnap1,Cpne6,Cst3,Ctbp1,Ctsb,Dctn1,Dld,Dpysl2,Dpysl3,Eef1a1,Fasn,Fis1,Fscn1,Gdi1,Gfap,Glg1,Glrx5,Glud1,Gnao1,Got2,Hpca,Hsp90ab1,Itpka,Kbp,Kcnab2,L1cam,Lgi1,Mag,Ncdn,Nfasc,Ntm,Ntrk2,Ogdh,Pebp1,Pin1,Pkm,Plp1,Ppp2ca,Ppp3r1,Prkcg,Prps1,Ptbp2,P…
GO:0005975	carbohydrate metabolic process	19	381	1.32e-05	Aldh5a1,Aldoa,Cs,Dlat,Gpd1,Gpd1l,Hk1,Itpka,Mdh2,Mpi,Ogdh,Pdha1,Pfkl,Pfkp,Pgam1,Pgp,Pkm,Ppp1cb,Tpi1
GO:0034613	cellular protein localization	36	1162	1.32e-05	Ap1g1,Ap2a1,Ap2a2,Ap2b1,Ap2m1,Ap2s1,Arl3,Atp1b1,Atp1b3,Bsg,Cdc42,Cfl1,Cltc,Cntnap1,Dynll1,Efr3b,Fis1,Hk1,Hspa4,Hspa8,Kpnb1,Nfasc,Nsf,Park7,Ppp3r1,Rab7,Rac1,Rapgef2,Rhob,Rims1,Ssb,Syngr1,Vcp,Vipas39,Ywhag,Ywhaq
GO:0044237	cellular metabolic process	130	7348	1.33e-05	Abat,Acaa1a,Acly,Adh5,Adssl1,Afg3l2,Aldh5a1,Aldoa,Ap2b1,Ap2m1,Ass1,Atp1a2,Atp1b1,Atp2b2,Atp5e,Atp5o,Atp6v1b2,Blmh,Camkv,Cand1,Capn2,Cbr1,Cbr3,Cd9,Celf4,Cfl1,Ckmt1,Cltc,Cnp,Cops8,Cs,Ctbp1,Ctsb,Ctsd,Ddah1,Dlat,Dld,Dnajc6,Dnm1,Dynll1,Echs1,Eef1a1,Eef1a2,Eef1g,Efr3b,Eif3c,Eif3f,Etfa,Fah,Fasn,Fbxl16,Fis1,Gad2,Gbas,Glrx5,Glud1,Gm10221,Got2,Gpd1,Gpd1l,Gstm5,Hectd3,Hint1,Hk1,Hnrnpl,Hpx,Hsp90ab1,Hspa8,Idh…
GO:0022008	neurogenesis	45	1650	1.39e-05	Actr3,Adam22,Afg3l2,Ap2a1,Arl3,Atp2b2,Atp8a2,Capzb,Cd9,Cdc42,Cfl1,Cnp,Cntnap1,Cpne6,Dpysl2,Dpysl3,Eef1a1,Gdi1,Gfap,Gnao1,Hsp90ab1,Itpka,L1cam,Lgi1,Mag,Ncdn,Nfasc,Ntm,Ntrk2,Ogdh,Pin1,Plp1,Ppp3r1,Rac1,Rapgef2,Rims1,Sept7,Sipa1l1,Smarcc2,Trf,Tubb3,Ube2v2,Uchl1,Vcan,Ywhag
GO:0010243	response to organonitrogen compound	30	867	1.44e-05	Abat,Ass1,Atp1a3,Atp2a2,Bsg,Capn2,Cd9,Cfl1,Dnm1,Dpysl2,Fis1,Gnao1,Got2,Gpd1,Hnrnpl,Hpca,Hsp90ab1,Ntrk2,Pebp1,Pkm,Prkcg,Qdpr,Rapgef2,Rpl23,Sh3bp1,Slc1a2,Slc8a1,Uqcrc1,Vcp,Ywhag
GO:0048731	system development	84	4072	1.44e-05	Abat,Actn1,Actr3,Adam22,Afg3l2,Aldh5a1,Ap2a1,Ap2b1,Arl3,Ass1,Atp1a3,Atp2b1,Atp2b2,Atp8a2,Bsg,C1qb,Cadm1,Capzb,Cd9,Cdc42,Cfl1,Cfl2,Cnp,Cntnap1,Cpne6,Cst3,Ctsb,Dctn1,Dpysl2,Dpysl3,Eef1a1,Fasn,Gdi1,Gfap,Glg1,Glrx5,Glud1,Gnao1,Got2,Hpca,Hsp90ab1,Itpka,Kbp,Kcnab2,L1cam,Lgi1,Mag,Ncdn,Nfasc,Ntm,Ntrk2,Ogdh,Pebp1,Pin1,Pkm,Plp1,Ppp3r1,Prkcg,Prps1,Ptbp2,Qdpr,Rac1,Rapgef2,Rhob,Rims1,Scn2b,Sdha,Sept7,Serpinb6…
GO:0061024	membrane organization	23	548	1.44e-05	Afg3l2,Ap2b1,Ap2m1,Atp2a2,Atp8a2,Cd9,Cdc42,Cnp,Dctn1,Dnajc11,Dnm1,Eea1,Fis1,Hspa4,Hspa8,Nfasc,Rab7,Rac1,Sh3bp1,Sirpa,Slc25a5,Syngr1,Tardbp
GO:0016192	vesicle-mediated transport	33	1020	1.56e-05	Ap1g1,Ap2a1,Ap2a2,Ap2b1,Ap2m1,Ap2s1,Arl3,Cadps,Cd9,Cdc42,Cltc,Coro1a,Cplx1,Dctn1,Dnajc6,Dnm1,Dpysl2,Eea1,Elmo2,Gdi2,Hspa8,Icam5,Lgi3,Nsf,Rab7,Rac1,Rhob,Rims1,Sh3bp1,Sirpa,Syngr1,Vcp,Vipas39
GO:1901698	response to nitrogen compound	32	971	1.58e-05	Abat,Ass1,Atp1a3,Atp2a2,Bsg,Capn2,Cd9,Cfl1,Dnm1,Dpysl2,Fis1,Gnai2,Gnao1,Got2,Gpd1,Gstm5,Hnrnpl,Hpca,Hsp90ab1,Ntrk2,Pebp1,Pkm,Prkcg,Qdpr,Rapgef2,Rpl23,Sh3bp1,Slc1a2,Slc8a1,Uqcrc1,Vcp,Ywhag
GO:0030007	cellular potassium ion homeostasis	5	10	1.69e-05	Atp1a2,Atp1a3,Atp1b1,Atp1b2,Atp1b3
GO:0006812	cation transport	28	795	2.39e-05	Afg3l2,Atp1a2,Atp1a3,Atp1b1,Atp1b2,Atp1b3,Atp2a2,Atp2b1,Atp2b2,Atp5e,Atp5o,Atp6v1b2,Atp6v1c1,Cltc,Coro1a,Gm10221,Gria3,Hpx,Kcnab2,Nsf,Park7,Scn2b,Slc1a2,Slc30a9,Slc32a1,Slc6a17,Slc8a1,Trf
GO:0061615	glycolytic process through fructose-6-phosphate	5	11	2.41e-05	Aldoa,Hk1,Mpi,Pfkl,Pfkp
GO:1901605	alpha-amino acid metabolic process	13	186	2.48e-05	Adssl1,Aldh5a1,Ass1,Blmh,Ddah1,Fah,Gad2,Glud1,Got2,Oat,P4hb,Pcmt1,Qdpr
GO:0006520	cellular amino acid metabolic process	15	253	2.6e-05	Abat,Adssl1,Aldh5a1,Ass1,Blmh,Ddah1,Fah,Gad2,Glud1,Got2,Oat,P4hb,Pcmt1,Qdpr,Vars
GO:0009065	glutamine family amino acid catabolic process	6	23	2.67e-05	Aldh5a1,Ddah1,Fah,Gad2,Glud1,Got2
GO:0120035	regulation of plasma membrane bounded cell projection organization	26	712	3e-05	Actr3,Ap2a1,Atp8a2,Capzb,Cdc42,Cfl1,Cpne6,Dpysl2,Dpysl3,Dynll1,Eef1a1,Fscn1,Gdi1,Gfap,Itpka,L1cam,Mag,Ntm,Ntrk2,Pfn2,Rac1,Rapgef2,Rims1,Sept7,Sipa1l1,Ube2v2
GO:0060627	regulation of vesicle-mediated transport	21	492	3.21e-05	Ap1g1,Ap2a1,Ap2b1,Ap2m1,Atp2a2,Cadps,Coro1a,Dnajc6,Dnm1,Gnai2,Hspa8,Lgi3,Necab2,Nsf,Pfn2,Prkcg,Rab7,Rims1,Sept5,Sirpa,Trf
GO:0048167	regulation of synaptic plasticity	13	193	3.5e-05	Atp2b2,Cfl1,Gfap,Itpka,Ncdn,Ntrk2,Rac1,Rapgef2,Rims1,Sipa1l1,Syngr1,Synpo,Ywhag
GO:1901566	organonitrogen compound biosynthetic process	34	1122	3.94e-05	Abat,Acly,Adssl1,Aldoa,Ass1,Atp5e,Atp5o,Dlat,Dld,Eef1a1,Eef1a2,Eef1g,Eif3c,Eif3f,Gbas,Glud1,Gm10221,Got2,Hk1,Mpi,Oat,Ogdh,Pdha1,Pfkl,Pfkp,Pgam1,Pkm,Prps1,Qdpr,Rpl23,Rps17,Tpi1,Vars,Vcp
GO:0030030	cell projection organization	32	1020	4.01e-05	Actr3,Afg3l2,Arl3,Atp1a3,Atp2b2,Atp8a2,Capzb,Cdc42,Cfl1,Cnp,Cntnap1,Coro1a,Dctn1,Dpysl2,Dynll1,Dynll2,Fscn1,Gfap,Gnao1,Hsp90ab1,Itpka,L1cam,Lgi1,Ncdn,Nfasc,Plp1,Rac1,Rapgef2,Sept7,Sh3bp1,Tubb3,Uchl1
GO:0006897	endocytosis	19	424	5.1e-05	Ap2a1,Ap2a2,Ap2b1,Ap2m1,Ap2s1,Cd9,Cdc42,Cltc,Coro1a,Dnajc6,Dnm1,Dpysl2,Eea1,Elmo2,Icam5,Rab7,Rac1,Sh3bp1,Sirpa
GO:0120036	plasma membrane bounded cell projection organization	31	982	5.14e-05	Actr3,Afg3l2,Arl3,Atp1a3,Atp2b2,Atp8a2,Capzb,Cdc42,Cnp,Cntnap1,Coro1a,Dctn1,Dpysl2,Dynll1,Dynll2,Fscn1,Gfap,Gnao1,Hsp90ab1,Itpka,L1cam,Lgi1,Ncdn,Nfasc,Plp1,Rac1,Rapgef2,Sept7,Sh3bp1,Tubb3,Uchl1
GO:0006119	oxidative phosphorylation	8	63	5.16e-05	Atp5o,Dld,Gbas,Ndufb8,Ndufv1,Sdha,Uqcrc1,Uqcrh
GO:0010638	positive regulation of organelle organization	22	554	5.31e-05	Actr3,Arpc1a,Atl3,Cct3,Cct7,Cfl1,Cfl2,Ctbp1,Dctn1,Dstn,Dync1h1,Dynll1,Fis1,Fscn1,Hspa1b,Pebp1,Pfn2,Rac1,Sept7,Sh3bp1,Synpo,Trim28
GO:0010248	establishment or maintenance of transmembrane electrochemical gradient	5	14	5.61e-05	Atp1a2,Atp1a3,Atp1b1,Atp1b2,Atp1b3
GO:0071705	nitrogen compound transport	39	1420	6.32e-05	Ap1g1,Ap2a1,Ap2a2,Ap2b1,Ap2m1,Ap2s1,Arl3,Cadps,Cfl1,Cltc,Cplx1,Dynll1,Fis1,Gdi1,Gdi2,Gpm6b,Hpx,Hspa4,Hspa8,Khsrp,Kpnb1,Nsf,Ntrk2,Park7,Ppp3r1,Rab7,Rhob,Rims1,Selenbp1,Slc1a2,Slc25a5,Slc32a1,Slc6a17,Ssb,Syngr1,Vcp,Vipas39,Ywhag,Ywhaq
GO:0032535	regulation of cellular component size	17	351	6.35e-05	Actr3,Ap2m1,Arpc1a,Atp2b2,Capzb,Cfl1,Cfl2,Coro1a,Dpysl2,Dstn,Gdi1,Hsp90ab1,L1cam,Mag,Pfn2,Rac1,Sh3bp1
GO:0043269	regulation of ion transport	24	655	6.82e-05	Abat,Atp1a2,Atp1b1,Atp1b2,Atp1b3,Atp2b2,Atp8a2,Cfl1,Coro1a,Dpysl2,Gbas,Gnai2,Gnao1,Gpd1l,Gpm6b,Hk1,Hpca,Kcnab2,Park7,Ppp2ca,Scn2b,Slc8a1,Trf,Ywhaq
GO:0048699	generation of neurons	41	1538	6.88e-05	Actr3,Afg3l2,Ap2a1,Arl3,Atp2b2,Atp8a2,Capzb,Cdc42,Cfl1,Cnp,Cntnap1,Cpne6,Dpysl2,Dpysl3,Eef1a1,Gdi1,Gfap,Gnao1,Hsp90ab1,Itpka,L1cam,Lgi1,Mag,Ncdn,Nfasc,Ntm,Ntrk2,Ogdh,Pin1,Plp1,Rac1,Rapgef2,Rims1,Sept7,Sipa1l1,Smarcc2,Trf,Tubb3,Ube2v2,Uchl1,Ywhag
GO:0031346	positive regulation of cell projection organization	19	435	6.92e-05	Actr3,Ap2a1,Atp8a2,Cdc42,Cfl1,Cpne6,Dpysl3,Dynll1,Eef1a1,Fscn1,Gdi1,Itpka,L1cam,Ntrk2,Rac1,Rapgef2,Rims1,Sept7,Ube2v2
GO:0006084	acetyl-CoA metabolic process	6	29	7.72e-05	Acly,Cs,Dlat,Dld,Fasn,Pdha1
GO:0051493	regulation of cytoskeleton organization	20	484	8.37e-05	Actr3,Arpc1a,Capn2,Capzb,Cfl1,Cfl2,Chordc1,Cltc,Coro1a,Dctn1,Dstn,Dync1h1,Fscn1,Gpm6b,Hspa1b,Hsph1,Pfn2,Rac1,Sh3bp1,Synpo
GO:0042221	response to chemical	73	3532	8.4e-05	Abat,Actr3,Adh5,Adssl1,Ass1,Atp1a2,Atp1a3,Atp2a2,Atp2b1,Blmh,Bsg,Capn2,Cd9,Cdc42,Cfl1,Cnp,Coro1a,Cpne6,Cst3,Ctsb,Dnm1,Dpysl2,Dpysl3,Eef1a1,Eef1a2,Elmo2,Fasn,Fis1,Gad2,Gdi1,Glud1,Gnai2,Gnao1,Got2,Gpd1,Gstm5,Hnrnpl,Hpca,Hsp90ab1,Hspa4l,Hsph1,Khsrp,L1cam,Lgi1,Nfasc,Ntrk2,P4hb,Park7,Pebp1,Pfkl,Pfkp,Pkm,Ppp2ca,Prdx5,Prkcg,Qdpr,Rac1,Rapgef2,Rhob,Rpl23,Scn2b,Sh3bp1,Slc1a2,Slc25a5,Slc32a1,Slc6a17,Slc8a1,…
GO:0006538	glutamate catabolic process	4	6	8.74e-05	Aldh5a1,Gad2,Glud1,Got2
GO:0022900	electron transport chain	10	120	9.02e-05	Aldh5a1,Dld,Etfa,Glrx5,Gpd1,Ndufb8,Ndufv1,Sdha,Uqcrc1,Uqcrh
GO:0050808	synapse organization	12	181	9.23e-05	Afg3l2,Atp2b2,Cadm1,Cdc42,Dctn1,Itpka,L1cam,Nfasc,Ntrk2,Pin1,Sept7,Synpo
GO:0048856	anatomical structure development	93	4912	9.33e-05	Abat,Actn1,Actr3,Adam22,Afg3l2,Aldh5a1,Ap2a1,Ap2b1,Arl3,Ass1,Atp1a3,Atp2a2,Atp2b1,Atp2b2,Atp8a2,Bsg,C1qb,Cadm1,Capn2,Capzb,Cd9,Cdc42,Cfl1,Cfl2,Cnp,Cntnap1,Cpne6,Cst3,Ctsb,Dctn1,Dld,Dpysl2,Dpysl3,Eef1a1,Fasn,Fis1,Fscn1,Gdi1,Gfap,Glg1,Glrx5,Glud1,Gnao1,Got2,Hpca,Hsp90ab1,Itpka,Kbp,Kcnab2,L1cam,Lgi1,Mag,Ncdn,Nfasc,Ntm,Ntrk2,Ogdh,Pebp1,Pin1,Pkm,Plp1,Ppp2ca,Ppp3r1,Prkcg,Prps1,Ptbp2,Pzp,Qdpr,Rac1,Rapge…
GO:0032781	positive regulation of ATPase activity	7	49	0.0001	Atp1b1,Atp1b2,Atp1b3,Dnaja2,Dynll1,Dynll2,Pfn2
GO:0051336	regulation of hydrolase activity	33	1128	0.0001	Atp1b1,Atp1b2,Atp1b3,Cst3,Dnaja2,Dynll1,Dynll2,Fis1,Gdi1,Gdi2,Gnai2,Gnao1,Hpca,Hsp90ab1,Hspa1b,Lxn,Ntrk2,Park7,Pebp1,Pfn2,Pin1,Ppp2ca,Ppp2r1a,Prdx5,Pzp,Rapgef2,Serpinb6a,Sh3bp1,Sipa1l1,Smap2,Usp14,Vcan,Vcp
GO:0006457	protein folding	11	153	0.00011	Cct3,Cct7,Chordc1,Dnaja2,Hsp90ab1,Hspa1b,Hspa4l,Hspa8,Hsph1,P4hb,Vbp1
GO:0019318	hexose metabolic process	10	123	0.00011	Aldh5a1,Aldoa,Dlat,Gpd1,Hk1,Mpi,Pdha1,Pgam1,Pkm,Tpi1
GO:0019725	cellular homeostasis	26	777	0.00012	Afg3l2,Aldoa,Atp1a2,Atp1a3,Atp1b1,Atp1b2,Atp1b3,Atp2a2,Atp2b1,Atp2b2,Cfl2,Dctn1,Dld,Dmxl2,Fis1,Glrx5,Gng3,Hk1,Hpx,P4hb,Ppp2ca,Prdx5,Rab7,Slc30a9,Slc8a1,Trf
GO:1901137	carbohydrate derivative biosynthetic process	20	498	0.00012	Acly,Adssl1,Aldoa,Atp5e,Atp5o,Dlat,Dld,Gbas,Gm10221,Hk1,Mpi,Ogdh,Pdha1,Pfkl,Pfkp,Pgam1,Pkm,Prps1,Tpi1,Vcp
GO:0007275	multicellular organism development	88	4603	0.00013	Abat,Actn1,Actr3,Adam22,Afg3l2,Aldh5a1,Ap2a1,Ap2b1,Arl3,Ass1,Atp1a3,Atp2b1,Atp2b2,Atp8a2,Bsg,C1qb,Cadm1,Capn2,Capzb,Cd9,Cdc42,Cfl1,Cfl2,Cnp,Cntnap1,Cpne6,Cst3,Ctsb,Dctn1,Dld,Dpysl2,Dpysl3,Eef1a1,Fasn,Gdi1,Gfap,Glg1,Glrx5,Glud1,Gnao1,Got2,Hpca,Hsp90ab1,Itpka,Kbp,Kcnab2,L1cam,Lgi1,Mag,Ncdn,Nfasc,Ntm,Ntrk2,Ogdh,Pebp1,Pin1,Pkm,Plp1,Ppp3r1,Prkcg,Prps1,Ptbp2,Pzp,Qdpr,Rac1,Rapgef2,Rhob,Rims1,Scn2b,Sdha,…
GO:0044089	positive regulation of cellular component biogenesis	20	501	0.00013	Actr3,Arpc1a,Cand1,Cdc42,Cfl1,Dctn1,Dpysl3,Dync1h1,Dynll1,Fscn1,Hspa1b,Ntrk2,Pfn2,Rab7,Rac1,Rims1,Sept7,Synpo,Ube2v2,Vcp
GO:0050790	regulation of catalytic activity	49	2057	0.00013	Atp1b1,Atp1b2,Atp1b3,Cand1,Cdc42,Chordc1,Cops8,Cst3,Ctsb,Dnaja2,Dynll1,Dynll2,Eef1a2,Fis1,Gbas,Gdi1,Gdi2,Gnai2,Gnao1,Hpca,Hsp90ab1,Hspa1b,Hspa8,Hsph1,Lxn,Mapre3,Ntrk2,Park7,Pebp1,Pfn2,Pin1,Ppp2ca,Ppp2r1a,Prdx5,Pzp,Rac1,Rap2b,Rapgef2,Rnh1,Rpl23,Serpinb6a,Sh3bp1,Sipa1l1,Smap2,Trf,Uchl1,Usp14,Vcan,Vcp
GO:0098655	cation transmembrane transport	23	639	0.00013	Afg3l2,Atp1a2,Atp1a3,Atp1b1,Atp1b2,Atp1b3,Atp2a2,Atp2b1,Atp2b2,Atp5e,Atp5o,Atp6v1b2,Atp6v1c1,Gm10221,Gria3,Kcnab2,Scn2b,Slc1a2,Slc30a9,Slc32a1,Slc6a17,Slc8a1,Trf
GO:0098662	inorganic cation transmembrane transport	21	547	0.00013	Afg3l2,Atp1a2,Atp1a3,Atp1b1,Atp1b2,Atp1b3,Atp2a2,Atp2b1,Atp2b2,Atp5e,Atp5o,Atp6v1b2,Atp6v1c1,Gm10221,Kcnab2,Scn2b,Slc1a2,Slc32a1,Slc6a17,Slc8a1,Trf
GO:0030154	cell differentiation	71	3462	0.00014	Actn1,Actr3,Adam22,Afg3l2,Ap1g1,Ap2a1,Arl3,Atp2a2,Atp2b2,Atp8a2,Cadm1,Cand1,Capn2,Capzb,Cd9,Cdc42,Cfl1,Cfl2,Cnp,Cntnap1,Cpne6,Cst3,Ctbp1,Ctsb,Dld,Dpysl2,Dpysl3,Eef1a1,Fasn,Gdi1,Gfap,Gnao1,Hsp90ab1,Itpka,Kbp,Kcnab2,L1cam,Lgi1,Mag,Ncdn,Nfasc,Ntm,Ntrk2,Ogdh,Pebp1,Pin1,Plp1,Ppp3r1,Rac1,Rapgef2,Rhob,Rims1,Selenbp1,Sept6,Sept7,Sh3bp1,Sipa1l1,Sirpa,Slc8a1,Smarcc2,Tmsb4x,Tpt1,Trf,Trim28,Tubb3,Ube2v2,Uchl…
GO:0032984	protein-containing complex disassembly	9	100	0.00014	Cfl1,Cfl2,Dnajc6,Dstn,Hspa8,Nsf,Rpl23,Smarcc2,Vcp
GO:0006790	sulfur compound metabolic process	14	262	0.00015	Acly,Aldh5a1,Blmh,Cs,Dlat,Dld,Eef1g,Fasn,Gstm5,Ogdh,Park7,Pcmt1,Pdha1,Suclg1
GO:0015672	monovalent inorganic cation transport	17	380	0.00015	Atp1a2,Atp1a3,Atp1b1,Atp1b2,Atp1b3,Atp5e,Atp5o,Atp6v1b2,Atp6v1c1,Gm10221,Kcnab2,Nsf,Scn2b,Slc1a2,Slc32a1,Slc6a17,Slc8a1
GO:1901700	response to oxygen-containing compound	38	1429	0.00015	Abat,Adh5,Ass1,Atp1a2,Atp1a3,Atp2a2,Atp2b1,Bsg,Capn2,Cd9,Cfl1,Cnp,Cst3,Dnm1,Dpysl2,Fis1,Gnai2,Gnao1,Got2,Gpd1,Hnrnpl,Hpca,Hsp90ab1,Ntrk2,Park7,Pebp1,Pfkl,Pkm,Ppp2ca,Prdx5,Qdpr,Rapgef2,Rhob,Rpl23,Sh3bp1,Slc1a2,Slc8a1,Ywhag
GO:0006637	acyl-CoA metabolic process	8	76	0.00016	Acly,Cs,Dlat,Dld,Fasn,Ogdh,Pdha1,Suclg1
GO:0006811	ion transport	33	1156	0.00016	Afg3l2,Atp1a2,Atp1a3,Atp1b1,Atp1b2,Atp1b3,Atp2a2,Atp2b1,Atp2b2,Atp5e,Atp5o,Atp6v1b2,Atp6v1c1,Atp8a2,Cltc,Coro1a,Gm10221,Got2,Gria3,Hpx,Kcnab2,Nsf,Ntrk2,Park7,Scn2b,Slc1a2,Slc25a3,Slc25a5,Slc30a9,Slc32a1,Slc6a17,Slc8a1,Trf
GO:0048869	cellular developmental process	72	3545	0.00016	Actn1,Actr3,Adam22,Afg3l2,Ap1g1,Ap2a1,Arl3,Atp2a2,Atp2b2,Atp8a2,Cadm1,Cand1,Capn2,Capzb,Cd9,Cdc42,Cfl1,Cfl2,Cnp,Cntnap1,Cpne6,Cst3,Ctbp1,Ctsb,Dld,Dpysl2,Dpysl3,Eef1a1,Fasn,Fis1,Gdi1,Gfap,Gnao1,Hsp90ab1,Itpka,Kbp,Kcnab2,L1cam,Lgi1,Mag,Ncdn,Nfasc,Ntm,Ntrk2,Ogdh,Pebp1,Pin1,Plp1,Ppp3r1,Rac1,Rapgef2,Rhob,Rims1,Selenbp1,Sept6,Sept7,Sh3bp1,Sipa1l1,Sirpa,Slc8a1,Smarcc2,Tmsb4x,Tpt1,Trf,Trim28,Tubb3,Ube2v2…
GO:0022904	respiratory electron transport chain	8	78	0.00018	Aldh5a1,Dld,Gpd1,Ndufb8,Ndufv1,Sdha,Uqcrc1,Uqcrh
GO:0071704	organic substance metabolic process	130	7733	0.00018	Abat,Acaa1a,Acly,Adam22,Adh5,Adssl1,Afg3l2,Aldh5a1,Aldoa,Ap2b1,Ap2m1,Ass1,Atp1a2,Atp1b1,Atp2b2,Atp5e,Atp5o,Atp6v1b2,Blmh,C1qb,Camkv,Cand1,Capn2,Cbr3,Cd9,Celf4,Cfl1,Cltc,Cnp,Cops8,Cs,Ctbp1,Ctsb,Ctsd,Ddah1,Dlat,Dld,Dnajc6,Dnm1,Dynll1,Echs1,Eef1a1,Eef1a2,Eef1g,Efr3b,Eif3c,Eif3f,Etfa,Fah,Fasn,Fbxl16,Gad2,Gbas,Glrx5,Glud1,Gm10221,Got2,Gpd1,Gpd1l,Gstm5,Hdlbp,Hectd3,Hint1,Hk1,Hnrnpl,Hpx,Hsp90ab1,Hspa8,I…
GO:0008104	protein localization	43	1733	0.00019	Anks1b,Ap1g1,Ap2a1,Ap2a2,Ap2b1,Ap2m1,Ap2s1,Arl3,Atp1b1,Atp1b3,Bsg,Cadps,Cdc42,Cfl1,Cltc,Cntnap1,Cplx1,Dynll1,Efr3b,Fis1,Gdi1,Gdi2,Gpm6b,Hk1,Hspa4,Hspa8,Kpnb1,Nfasc,Nsf,Park7,Ppp3r1,Rab7,Rac1,Rapgef2,Rhob,Rims1,Selenbp1,Ssb,Syngr1,Vcp,Vipas39,Ywhag,Ywhaq
GO:0050896	response to stimulus	115	6616	0.0002	Abat,Actr3,Adh5,Adssl1,Afg3l2,Ap1g1,Arl3,Ass1,Atp1a2,Atp1a3,Atp1b1,Atp2a2,Atp2b1,Atp2b2,Atp8a2,Blmh,Bsg,C1qb,Cadm1,Camkv,Capn2,Cd9,Cdc42,Cfl1,Cnp,Cops8,Coro1a,Cpne6,Cst3,Ctbp1,Ctsb,Dnaja2,Dnm1,Dpysl2,Dpysl3,Eef1a1,Eef1a2,Elmo2,Fasn,Fis1,Gad2,Gdi1,Gdi2,Gfap,Glud1,Gnai2,Gnao1,Gnaz,Gng3,Got2,Gpd1,Gria3,Gstm5,Hint1,Hk1,Hnrnpl,Hpca,Hsp90ab1,Hspa1b,Hspa4,Hspa4l,Hsph1,Khsrp,Kpnb1,L1cam,Lgi1,Lxn,Mag,N281…
GO:1901606	alpha-amino acid catabolic process	8	80	0.00021	Aldh5a1,Blmh,Ddah1,Fah,Gad2,Glud1,Got2,Qdpr
GO:0033043	regulation of organelle organization	32	1127	0.00023	Actr3,Arpc1a,Atl3,Capn2,Capzb,Cct3,Cct7,Cdc42,Cfl1,Cfl2,Chordc1,Cltc,Coro1a,Ctbp1,Dctn1,Dstn,Dync1h1,Dynll1,Fis1,Fscn1,Gpm6b,Hspa1b,Hsph1,Pebp1,Pfn2,Rac1,Sept7,Sh3bp1,Slc25a5,Synpo,Trim28,Vat1
GO:0015031	protein transport	32	1129	0.00024	Ap1g1,Ap2a1,Ap2a2,Ap2b1,Ap2m1,Ap2s1,Arl3,Cadps,Cfl1,Cltc,Cplx1,Dynll1,Fis1,Gdi1,Gdi2,Gpm6b,Hspa4,Hspa8,Kpnb1,Nsf,Park7,Ppp3r1,Rab7,Rhob,Rims1,Selenbp1,Ssb,Syngr1,Vcp,Vipas39,Ywhag,Ywhaq
GO:0098660	inorganic ion transmembrane transport	22	625	0.00027	Afg3l2,Atp1a2,Atp1a3,Atp1b1,Atp1b2,Atp1b3,Atp2a2,Atp2b1,Atp2b2,Atp5e,Atp5o,Atp6v1b2,Atp6v1c1,Gm10221,Kcnab2,Scn2b,Slc1a2,Slc25a3,Slc32a1,Slc6a17,Slc8a1,Trf
GO:0016310	phosphorylation	30	1034	0.00029	Aldoa,Atp5o,Camkv,Cfl1,Ckmt1,Dld,Efr3b,Gbas,Hk1,Hspa8,Itpka,Mpi,Ndufb8,Ndufv1,Ntrk2,Ogdh,Pebp1,Pfkl,Pfkp,Pgam1,Pkm,Prkcg,Prps1,Sdha,Tpi1,Trf,Trim28,Trio,Uqcrc1,Uqcrh
GO:0033036	macromolecule localization	47	2009	0.0003	Anks1b,Ap1g1,Ap2a1,Ap2a2,Ap2b1,Ap2m1,Ap2s1,Arl3,Atp1b1,Atp1b3,Atp8a2,Bsg,Cadps,Cdc42,Cfl1,Cltc,Cntnap1,Cplx1,Dynll1,Efr3b,Fis1,Gdi1,Gdi2,Got2,Gpm6b,Hdlbp,Hk1,Hspa4,Hspa8,Khsrp,Kpnb1,Nfasc,Nsf,Park7,Ppp3r1,Rab7,Rac1,Rapgef2,Rhob,Rims1,Selenbp1,Ssb,Syngr1,Vcp,Vipas39,Ywhag,Ywhaq
GO:0051495	positive regulation of cytoskeleton organization	12	208	0.0003	Actr3,Arpc1a,Cfl1,Cfl2,Dctn1,Dstn,Dync1h1,Hspa1b,Pfn2,Rac1,Sh3bp1,Synpo
GO:0071702	organic substance transport	42	1716	0.00032	Ap1g1,Ap2a1,Ap2a2,Ap2b1,Ap2m1,Ap2s1,Arl3,Atp8a2,Cadps,Cfl1,Cltc,Cplx1,Dynll1,Fis1,Gdi1,Gdi2,Got2,Gpm6b,Hdlbp,Hpx,Hspa4,Hspa8,Khsrp,Kpnb1,Nsf,Ntrk2,Park7,Ppp3r1,Rab7,Rhob,Rims1,Selenbp1,Slc1a2,Slc25a5,Slc32a1,Slc6a17,Ssb,Syngr1,Vcp,Vipas39,Ywhag,Ywhaq
GO:0009063	cellular amino acid catabolic process	8	86	0.00033	Aldh5a1,Blmh,Ddah1,Fah,Gad2,Glud1,Got2,Qdpr
GO:0045184	establishment of protein localization	33	1206	0.00034	Ap1g1,Ap2a1,Ap2a2,Ap2b1,Ap2m1,Ap2s1,Arl3,Cadps,Cfl1,Cltc,Cplx1,Dynll1,Fis1,Gdi1,Gdi2,Gpm6b,Hk1,Hspa4,Hspa8,Kpnb1,Nsf,Park7,Ppp3r1,Rab7,Rhob,Rims1,Selenbp1,Ssb,Syngr1,Vcp,Vipas39,Ywhag,Ywhaq
GO:0010975	regulation of neuron projection development	20	547	0.00038	Actr3,Ap2a1,Atp8a2,Cfl1,Cpne6,Dpysl2,Dpysl3,Eef1a1,Gdi1,Gfap,Itpka,L1cam,Mag,Ntm,Ntrk2,Rac1,Rapgef2,Rims1,Sipa1l1,Ube2v2
GO:0032880	regulation of protein localization	28	947	0.0004	Abat,Actr3,Ap2b1,Ap2m1,Cadm1,Cct3,Cct7,Cdc42,Cfl1,Cltc,Dctn1,Dynll1,Fis1,Gdi1,Glud1,Gpd1l,Gpm6b,Hk1,Hpca,Hsp90ab1,Hsph1,Kcnab2,Necab2,Park7,Pfkl,Pin1,Ppp2ca,Trim28
GO:1902905	positive regulation of supramolecular fiber organization	11	181	0.00041	Actr3,Arpc1a,Cfl1,Cfl2,Dctn1,Dstn,Hspa1b,Pfn2,Rac1,Sh3bp1,Synpo
GO:0006105	succinate metabolic process	4	11	0.00043	Aldh5a1,Gad2,Sdha,Suclg1
GO:0010976	positive regulation of neuron projection development	15	333	0.00043	Actr3,Ap2a1,Atp8a2,Cfl1,Cpne6,Dpysl3,Eef1a1,Gdi1,Itpka,L1cam,Ntrk2,Rac1,Rapgef2,Rims1,Ube2v2
GO:0090066	regulation of anatomical structure size	19	508	0.00044	Actr3,Ap2m1,Arpc1a,Atp1a2,Atp2b2,Capzb,Cfl1,Cfl2,Coro1a,Dpysl2,Dstn,Gdi1,Hsp90ab1,L1cam,Mag,Pfn2,Rac1,Sh3bp1,Slc8a1
GO:0006006	glucose metabolic process	8	91	0.00046	Aldh5a1,Dlat,Gpd1,Hk1,Pdha1,Pgam1,Pkm,Tpi1
GO:0046395	carboxylic acid catabolic process	11	184	0.00046	Acaa1a,Aldh5a1,Blmh,Ddah1,Echs1,Etfa,Fah,Gad2,Glud1,Got2,Qdpr
GO:0022411	cellular component disassembly	11	185	0.00048	Cfl1,Cfl2,Dctn1,Dnajc6,Dstn,Fis1,Hspa8,Nsf,Rpl23,Smarcc2,Vcp
GO:1903829	positive regulation of cellular protein localization	14	297	0.00048	Actr3,Ap2b1,Cct3,Cct7,Cdc42,Cfl1,Dctn1,Fis1,Gpd1l,Hpca,Hsp90ab1,Necab2,Park7,Trim28
GO:0006807	nitrogen compound metabolic process	118	6983	0.00049	Abat,Acly,Adam22,Adh5,Adssl1,Afg3l2,Aldh5a1,Aldoa,Ass1,Atp1a2,Atp1b1,Atp2b2,Atp5e,Atp5o,Atp6v1b2,Blmh,C1qb,Camkv,Cand1,Capn2,Celf4,Cfl1,Cnp,Cops8,Cs,Ctbp1,Ctsb,Ctsd,Ddah1,Dlat,Dld,Dnajc6,Dynll1,Eef1a1,Eef1a2,Eef1g,Eif3c,Eif3f,Fah,Fasn,Fbxl16,Gad2,Gbas,Glrx5,Glud1,Gm10221,Got2,Gpd1,Gpd1l,Gstm5,Hectd3,Hint1,Hk1,Hnrnpl,Hpx,Hsp90ab1,Hspa8,Idh3g,Itpka,Kcnab2,Khsrp,Mdh2,Mpi,Ndufb8,Ndufv1,Ntrk2,Nudt3,Oa…
GO:0030004	cellular monovalent inorganic cation homeostasis	8	92	0.00049	Atp1a2,Atp1a3,Atp1b1,Atp1b2,Atp1b3,Dmxl2,Rab7,Slc8a1
GO:0032412	regulation of ion transmembrane transporter activity	12	223	0.00051	Atp1a2,Atp1b1,Atp1b2,Atp1b3,Cfl1,Gbas,Gpd1l,Hk1,Hpca,Park7,Ppp2ca,Scn2b
GO:0008064	regulation of actin polymerization or depolymerization	10	154	0.00052	Actr3,Arpc1a,Capzb,Cfl1,Cfl2,Coro1a,Dstn,Pfn2,Rac1,Sh3bp1
GO:0009636	response to toxic substance	18	471	0.00052	Abat,Adh5,Ass1,Atp1a2,Blmh,Cfl1,Cnp,Cst3,Dpysl2,Gnao1,Got2,Gstm5,Hpca,Park7,Pebp1,Prdx5,Rhob,Scn2b
GO:0008037	cell recognition	9	123	0.00053	Aldoa,Cadm1,Cadm2,Cadm4,Cct3,Cct7,Hspa1b,L1cam,Sirpa
GO:0030836	positive regulation of actin filament depolymerization	4	12	0.00053	Cfl1,Cfl2,Dstn,Sh3bp1
GO:0032970	regulation of actin filament-based process	15	342	0.00053	Actr3,Arpc1a,Atp1a2,Atp2a2,Capzb,Cfl1,Cfl2,Coro1a,Dstn,Fscn1,Gpm6b,Pfn2,Rac1,Sh3bp1,Synpo
GO:1903288	positive regulation of potassium ion import across plasma membrane	3	3	0.00053	Atp1b1,Atp1b2,Atp1b3
GO:0010959	regulation of metal ion transport	16	385	0.00054	Atp1a2,Atp1b1,Atp1b2,Atp1b3,Atp2b2,Coro1a,Gbas,Gnai2,Gnao1,Gpd1l,Hpca,Kcnab2,Ppp2ca,Scn2b,Slc8a1,Trf
GO:0022610	biological adhesion	23	712	0.00054	Actn1,Atp1b1,Atp1b2,Cadm1,Cadm2,Cadm4,Cd9,Cdc42,Cntnap1,Coro1a,Elmo2,Hsp90ab1,Icam5,L1cam,Mag,Mog,Nfasc,Ntm,Rac1,Rap2b,Rhob,Sirpa,Vcan
GO:0042552	myelination	8	95	0.00057	Adam22,Afg3l2,Cd9,Cntnap1,Mag,Nfasc,Plp1,Ppp3r1
GO:1990573	potassium ion import across plasma membrane	5	27	0.00059	Atp1a2,Atp1a3,Atp1b1,Atp1b2,Atp1b3
GO:0022604	regulation of cell morphogenesis	18	478	0.0006	Actr3,Aldoa,Capzb,Cdc42,Cfl1,Coro1a,Cpne6,Dpysl2,Gdi1,Itpka,L1cam,Mag,Ntrk2,Rac1,Rapgef2,Rims1,Sept7,Sipa1l1
GO:1904062	regulation of cation transmembrane transport	14	306	0.0006	Atp1a2,Atp1b1,Atp1b2,Atp1b3,Cfl1,Coro1a,Gbas,Gpd1l,Hpca,Kcnab2,Park7,Ppp2ca,Scn2b,Slc8a1
GO:0006085	acetyl-CoA biosynthetic process	4	13	0.00066	Acly,Dlat,Dld,Pdha1
GO:0044238	primary metabolic process	123	7426	0.00069	Abat,Acaa1a,Acly,Adam22,Adh5,Adssl1,Afg3l2,Aldh5a1,Aldoa,Ass1,Atp1a2,Atp1b1,Atp2b2,Atp5e,Atp5o,Atp6v1b2,Blmh,C1qb,Camkv,Cand1,Capn2,Celf4,Cfl1,Cnp,Cops8,Cs,Ctbp1,Ctsb,Ctsd,Ddah1,Dlat,Dld,Dnajc6,Dynll1,Echs1,Eef1a1,Eef1a2,Eef1g,Efr3b,Eif3c,Eif3f,Etfa,Fah,Fasn,Fbxl16,Gad2,Gbas,Glrx5,Glud1,Gm10221,Got2,Gpd1,Gpd1l,Hdlbp,Hectd3,Hint1,Hk1,Hnrnpl,Hpx,Hsp90ab1,Hspa8,Idh3g,Itpka,Kcnab2,Khsrp,Mdh2,Mpi,Nduf…
GO:0043624	cellular protein complex disassembly	6	48	0.0007	Cfl1,Cfl2,Dnajc6,Dstn,Hspa8,Nsf
GO:0048666	neuron development	24	783	0.00077	Afg3l2,Arl3,Atp2b2,Atp8a2,Capzb,Cdc42,Cnp,Cntnap1,Dpysl2,Gfap,Gnao1,Hsp90ab1,L1cam,Lgi1,Ncdn,Nfasc,Ntrk2,Ogdh,Plp1,Rac1,Rapgef2,Sept7,Tubb3,Uchl1
GO:0006107	oxaloacetate metabolic process	4	14	0.00082	Acly,Cs,Got2,Mdh2
GO:0030043	actin filament fragmentation	3	4	0.00085	Cfl1,Cfl2,Dstn
GO:0031175	neuron projection development	21	637	0.00085	Afg3l2,Atp2b2,Atp8a2,Capzb,Cdc42,Cnp,Cntnap1,Dpysl2,Gfap,Gnao1,Hsp90ab1,L1cam,Lgi1,Ncdn,Nfasc,Plp1,Rac1,Rapgef2,Sept7,Tubb3,Uchl1
GO:0042391	regulation of membrane potential	16	404	0.00085	Abat,Atp1a3,Atp1b1,Atp1b2,Atp1b3,Atp2a2,Celf4,Cntnap1,Dld,Gpd1l,Gria3,Park7,Rims1,Scn2b,Slc8a1,Vcp
GO:0065009	regulation of molecular function	62	3081	0.00085	Actr3,Atp1a2,Atp1b1,Atp1b2,Atp1b3,Cand1,Cdc42,Cfl1,Chordc1,Ckmt1,Cops8,Cst3,Ctsb,Dnaja2,Dynll1,Dynll2,Eef1a2,Eif3c,Fis1,Gbas,Gdi1,Gdi2,Gnai2,Gnao1,Gpd1l,Hk1,Hnrnpl,Hpca,Hsp90ab1,Hspa1b,Hspa4,Hspa8,Hsph1,Kcnab2,Lxn,Mapre3,Ntrk2,Park7,Pebp1,Pfn2,Pin1,Ppp2ca,Ppp2r1a,Prdx5,Pzp,Rac1,Rap2b,Rapgef2,Rnh1,Rpl23,Scn2b,Serpinb6a,Sh3bp1,Sipa1l1,Smap2,Trf,Trim28,Trio,Uchl1,Usp14,Vcan,Vcp
GO:1903278	positive regulation of sodium ion export across plasma membrane	3	4	0.00085	Atp1b1,Atp1b2,Atp1b3
GO:0051259	protein complex oligomerization	19	542	0.00086	Aldh5a1,Aldoa,Atl3,Dnm1,Dpysl3,Eef1a1,Fis1,Kcnab2,Lgi1,Oat,Pfkl,Pfkp,Pkm,Ppp2ca,Sept7,Slc1a2,Trim28,Uqcrh,Vcp
GO:1901565	organonitrogen compound catabolic process	24	790	0.00086	Aldh5a1,Blmh,Capn2,Ctsb,Ctsd,Ddah1,Fah,Gad2,Glud1,Got2,Hectd3,Hint1,Hspa8,Nudt3,Pcbp2,Psma5,Psmd4,Qdpr,Rab7,Sh3bp1,Uba1,Uchl1,Usp14,Vcp
GO:0030001	metal ion transport	20	591	0.00088	Afg3l2,Atp1a2,Atp1a3,Atp1b1,Atp1b2,Atp1b3,Atp2a2,Atp2b1,Atp2b2,Cltc,Coro1a,Hpx,Kcnab2,Nsf,Scn2b,Slc1a2,Slc30a9,Slc6a17,Slc8a1,Trf
GO:0120034	positive regulation of plasma membrane bounded cell projection assembly	8	103	0.00089	Actr3,Cdc42,Cfl1,Dpysl3,Dynll1,Fscn1,Rac1,Sept7
GO:1902903	regulation of supramolecular fiber organization	14	320	0.00089	Actr3,Arpc1a,Capzb,Cfl1,Cfl2,Coro1a,Dctn1,Dstn,Hspa1b,Hspa8,Pfn2,Rac1,Sh3bp1,Synpo
GO:0042775	mitochondrial ATP synthesis coupled electron transport	6	51	0.0009	Dld,Ndufb8,Ndufv1,Sdha,Uqcrc1,Uqcrh
GO:0009628	response to abiotic stimulus	29	1063	0.00093	Abat,Adssl1,Atp1a2,Atp1a3,Atp1b1,Atp2b1,Atp2b2,Atp8a2,Capn2,Cd9,Cst3,Dnaja2,Eef1a2,Hpca,Hsp90ab1,Hspa1b,Hspa4,Lxn,Mag,N28178,P4hb,Pebp1,Ppp1cb,Rac1,Rhob,Serpinb6a,Slc1a2,Slc8a1,Synpo
GO:0035725	sodium ion transmembrane transport	9	135	0.00094	Atp1a2,Atp1a3,Atp1b1,Atp1b2,Atp1b3,Scn2b,Slc1a2,Slc6a17,Slc8a1
GO:0043603	cellular amide metabolic process	21	644	0.00094	Acly,Aldh5a1,Ass1,Cs,Dlat,Dld,Eef1a1,Eef1a2,Eef1g,Eif3c,Eif3f,Fasn,Gstm5,Hspa8,Ogdh,Park7,Pdha1,Rpl23,Rps17,Suclg1,Vars
GO:0006836	neurotransmitter transport	10	169	0.00095	Atp1a2,Cadps,Cplx1,Park7,Rims1,Slc1a2,Slc32a1,Slc6a17,Syn2,Syn3
GO:0007264	small GTPase mediated signal transduction	11	205	0.00095	Arl3,Cdc42,Gdi1,Gdi2,Kpnb1,Rac1,Rap2b,Rapgef2,Rhob,Trim28,Ywhaq
GO:0010001	glial cell differentiation	10	169	0.00095	Actr3,Adam22,Cd9,Cnp,Cntnap1,Gfap,Mag,Ntrk2,Plp1,Ppp3r1
GO:0098739	import across plasma membrane	7	77	0.00098	Atp1a2,Atp1a3,Atp1b1,Atp1b2,Atp1b3,Slc1a2,Slc8a1
GO:0007420	brain development	22	701	0.001	Abat,Atp1a3,Atp2b1,Atp2b2,Cd9,Cfl1,Cnp,Cst3,Dpysl2,Glud1,Gnao1,Hpca,Ntrk2,Ogdh,Pebp1,Ptbp2,Rac1,Rapgef2,Slc1a2,Slc32a1,Slc6a17,Smarcc2
GO:0010035	response to inorganic substance	18	505	0.001	Abat,Ass1,Bsg,Cd9,Cfl1,Cpne6,Cst3,Eef1a2,Gdi1,Glud1,Gnao1,Hpca,Park7,Pebp1,Ppp2ca,Qdpr,Rhob,Trf
GO:0031647	regulation of protein stability	12	245	0.001	Atp1b1,Atp1b2,Atp1b3,Cct3,Cct7,Cdc42,Hspa8,Isoc2a,Park7,Pfn2,Pin1,Rpl23
GO:0007155	cell adhesion	22	705	0.0011	Actn1,Atp1b1,Atp1b2,Cadm1,Cadm2,Cadm4,Cd9,Cdc42,Cntnap1,Coro1a,Elmo2,Icam5,L1cam,Mag,Mog,Nfasc,Ntm,Rac1,Rap2b,Rhob,Sirpa,Vcan
GO:0010720	positive regulation of cell development	20	603	0.0011	Actr3,Ap2a1,Atp8a2,Cdc42,Cfl1,Cpne6,Dpysl3,Eef1a1,Gdi1,Gfap,Itpka,L1cam,Mag,Ntrk2,Pin1,Rac1,Rapgef2,Rims1,Trf,Ube2v2
GO:0010591	regulation of lamellipodium assembly	5	33	0.0012	Actr3,Capzb,Cfl1,Fscn1,Rac1
GO:0034220	ion transmembrane transport	25	865	0.0012	Afg3l2,Atp1a2,Atp1a3,Atp1b1,Atp1b2,Atp1b3,Atp2a2,Atp2b1,Atp2b2,Atp5e,Atp5o,Atp6v1b2,Atp6v1c1,Gm10221,Gria3,Kcnab2,Scn2b,Slc1a2,Slc25a3,Slc25a5,Slc30a9,Slc32a1,Slc6a17,Slc8a1,Trf
GO:0043523	regulation of neuron apoptotic process	12	251	0.0012	Cdc42,Coro1a,Fis1,Hsp90ab1,Hsph1,Mag,Ntrk2,Park7,Pin1,Prkcg,Ube2m,Ube2v2
GO:1902305	regulation of sodium ion transmembrane transport	6	55	0.0012	Atp1a2,Atp1b1,Atp1b2,Atp1b3,Gpd1l,Scn2b
GO:0072347	response to anesthetic	7	81	0.0013	Abat,Dpysl2,Gnao1,Got2,Hpca,Hsp90ab1,Prkcg
GO:0042493	response to drug	26	926	0.0014	Abat,Adssl1,Ass1,Atp1a2,Atp1a3,Blmh,Cfl1,Cst3,Dpysl2,Gad2,Gnai2,Gnao1,Got2,Hpca,Hsp90ab1,Park7,Pebp1,Prkcg,Qdpr,Rhob,Sh3bp1,Slc1a2,Slc25a5,Slc32a1,Slc6a17,Slc8a1
GO:0120032	regulation of plasma membrane bounded cell projection assembly	10	178	0.0014	Actr3,Capzb,Cdc42,Cfl1,Dpysl3,Dynll1,Fscn1,Pfn2,Rac1,Sept7
GO:0019722	calcium-mediated signaling	8	113	0.0015	Atp1b1,Atp2a2,Fis1,Hpca,Ncald,Ntrk2,Ppp3r1,Slc8a1
GO:0042063	gliogenesis	11	217	0.0015	Actr3,Adam22,Cd9,Cnp,Cntnap1,Gfap,Mag,Ntrk2,Plp1,Ppp3r1,Vcan
GO:0051261	protein depolymerization	5	35	0.0015	Cfl1,Cfl2,Dnajc6,Dstn,Hspa8
GO:0006103	2-oxoglutarate metabolic process	4	18	0.0016	Dld,Got2,Idh3g,Ogdh
GO:0032956	regulation of actin cytoskeleton organization	13	301	0.0016	Actr3,Arpc1a,Capzb,Cfl1,Cfl2,Coro1a,Dstn,Fscn1,Gpm6b,Pfn2,Rac1,Sh3bp1,Synpo
GO:0034765	regulation of ion transmembrane transport	16	433	0.0016	Atp1a2,Atp1b1,Atp1b2,Atp1b3,Cfl1,Coro1a,Gbas,Gpd1l,Hk1,Hpca,Kcnab2,Park7,Ppp2ca,Scn2b,Slc8a1,Ywhaq
GO:0043279	response to alkaloid	8	115	0.0016	Abat,Dpysl2,Gnao1,Got2,Hsp90ab1,Prkcg,Slc8a1,Uqcrc1
GO:0044403	symbiont process	11	220	0.0016	Cfl1,Ctsb,Eea1,Eif3f,Hsp90ab1,Hspa8,Pcbp2,Rab7,Ssb,Tardbp,Vcp
GO:0002028	regulation of sodium ion transport	7	86	0.0017	Atp1a2,Atp1b1,Atp1b2,Atp1b3,Gpd1l,Scn2b,Slc8a1
GO:0017157	regulation of exocytosis	10	184	0.0017	Ap1g1,Atp2a2,Cadps,Gnai2,Lgi3,Nsf,Pfn2,Rab7,Rims1,Sept5
GO:0030913	paranodal junction assembly	3	6	0.0017	Cd9,Cntnap1,Nfasc
GO:0050769	positive regulation of neurogenesis	18	531	0.0017	Actr3,Ap2a1,Atp8a2,Cfl1,Cpne6,Dpysl3,Eef1a1,Gdi1,Gfap,Itpka,L1cam,Mag,Ntrk2,Rac1,Rapgef2,Rims1,Trf,Ube2v2
GO:0098659	inorganic cation import across plasma membrane	6	59	0.0017	Atp1a2,Atp1a3,Atp1b1,Atp1b2,Atp1b3,Slc8a1
GO:0048468	cell development	37	1579	0.0018	Actn1,Adam22,Afg3l2,Arl3,Atp2a2,Atp2b2,Atp8a2,Capzb,Cd9,Cdc42,Cfl1,Cfl2,Cnp,Cntnap1,Cst3,Dld,Dpysl2,Fasn,Gfap,Gnao1,Hsp90ab1,L1cam,Lgi1,Mag,Ncdn,Nfasc,Ntrk2,Ogdh,Pebp1,Plp1,Ppp3r1,Rac1,Rapgef2,Sept7,Slc8a1,Tubb3,Uchl1
GO:1903426	regulation of reactive oxygen species biosynthetic process	7	87	0.0018	Ass1,Ddah1,Dynll1,Eef1a1,Hsp90ab1,Khsrp,Park7
GO:0006909	phagocytosis	8	118	0.0019	Cdc42,Coro1a,Elmo2,Icam5,Rab7,Rac1,Sh3bp1,Sirpa
GO:0072583	clathrin-dependent endocytosis	4	19	0.0019	Ap2a1,Ap2a2,Cltc,Dnm1
GO:0044093	positive regulation of molecular function	37	1593	0.0021	Actr3,Atp1b1,Atp1b2,Atp1b3,Cdc42,Cfl1,Cops8,Dnaja2,Dynll1,Dynll2,Eef1a2,Eif3c,Fis1,Gbas,Gdi1,Gdi2,Gnai2,Gnao1,Hnrnpl,Hpca,Hsp90ab1,Hspa4,Hspa8,Hsph1,Mapre3,Park7,Pfn2,Pin1,Ppp2ca,Rac1,Rapgef2,Sh3bp1,Sipa1l1,Smap2,Trf,Trim28,Vcp
GO:0031345	negative regulation of cell projection organization	10	193	0.0023	Actr3,Capzb,Cfl1,Dpysl3,Gdi1,Gfap,Mag,Ntm,Pfn2,Rapgef2
GO:0060359	response to ammonium ion	8	122	0.0023	Abat,Ass1,Dpysl2,Gnai2,Gnao1,Got2,Hsp90ab1,Prkcg
GO:0110053	regulation of actin filament organization	11	231	0.0023	Actr3,Arpc1a,Capzb,Cfl1,Cfl2,Coro1a,Dstn,Pfn2,Rac1,Sh3bp1,Synpo
GO:0010033	response to organic substance	52	2553	0.0024	Abat,Actr3,Adh5,Ass1,Atp1a2,Atp1a3,Atp2a2,Atp2b1,Bsg,Capn2,Cd9,Cdc42,Cfl1,Cnp,Coro1a,Cst3,Ctsb,Dnm1,Dpysl2,Dpysl3,Eef1a1,Fasn,Fis1,Gnai2,Gnao1,Got2,Gpd1,Hnrnpl,Hpca,Hsp90ab1,Hspa4l,Hsph1,Khsrp,Ntrk2,Park7,Pebp1,Pfkl,Pfkp,Pkm,Ppp2ca,Prkcg,Qdpr,Rapgef2,Rpl23,Sh3bp1,Slc1a2,Slc25a5,Slc8a1,Syngr1,Uqcrc1,Vcp,Ywhag
GO:0042176	regulation of protein catabolic process	14	360	0.0024	Cdc42,Cst3,Gfap,Hsp90ab1,Nsf,Park7,Pin1,Ppp2ca,Prkcg,Rab7,Rpl23,Ube2v2,Usp14,Vcp
GO:0050821	protein stabilization	9	157	0.0024	Atp1b1,Atp1b2,Atp1b3,Cct3,Cct7,Park7,Pfn2,Pin1,Rpl23
GO:0106027	neuron projection organization	5	40	0.0024	Atp1a3,Cdc42,Dctn1,Itpka,Sept7
GO:0010592	positive regulation of lamellipodium assembly	4	21	0.0025	Actr3,Cfl1,Fscn1,Rac1
GO:0021782	glial cell development	7	93	0.0025	Adam22,Cd9,Cntnap1,Gfap,Mag,Plp1,Ppp3r1
GO:0030182	neuron differentiation	26	973	0.0026	Afg3l2,Arl3,Atp2b2,Atp8a2,Capzb,Cdc42,Cnp,Cntnap1,Dpysl2,Gfap,Gnao1,Hsp90ab1,L1cam,Lgi1,Ncdn,Nfasc,Ntrk2,Ogdh,Pin1,Plp1,Rac1,Rapgef2,Sept7,Smarcc2,Tubb3,Uchl1
GO:0032386	regulation of intracellular transport	14	364	0.0026	Actr3,Atp2a2,Cdc42,Dctn1,Dync1h1,Fis1,Gdi1,Hpca,Hsp90ab1,Park7,Pfn2,Ppp2ca,Rims1,Trim28
GO:0044087	regulation of cellular component biogenesis	24	863	0.0026	Actr3,Arpc1a,Cand1,Capzb,Cdc42,Cfl1,Coro1a,Dctn1,Dpysl3,Dync1h1,Dynll1,Fscn1,Gpm6b,Hspa1b,Ntrk2,Pfn2,Rab7,Rac1,Rapgef2,Rims1,Sept7,Synpo,Ube2v2,Vcp
GO:0048519	negative regulation of biological process	84	4771	0.0026	Abat,Actn1,Actr3,Ap2a1,Ap2b1,Ap2m1,Ass1,Atp1a2,Atp2a2,Capzb,Cd9,Cdc42,Celf4,Cfl1,Chordc1,Ckmt1,Cltc,Cops8,Coro1a,Cst3,Ctbp1,Ctsb,Ddah1,Dnm1,Dpysl3,Dynll1,Eef1a1,Gdi1,Gfap,Glg1,Gnai2,Gnao1,Gpd1l,Gpm6b,Hk1,Hnrnpl,Hpca,Hsp90ab1,Hspa1b,Hspa4,Hspa8,Hsph1,Idh3g,Khsrp,Lxn,Mag,Necab2,Ntm,Ntrk2,Pabpc1,Park7,Pcbp2,Pcmt1,Pebp1,Pfkl,Pfn2,Pgp,Pin1,Ppp2ca,Prdx5,Prkcg,Ptbp2,Pzp,Rab7,Rac1,Rap2b,Rapgef2,Rhob,Rpl2…
GO:0051345	positive regulation of hydrolase activity	20	652	0.0026	Atp1b1,Atp1b2,Atp1b3,Dnaja2,Dynll1,Dynll2,Fis1,Gdi1,Gdi2,Gnao1,Hpca,Hsp90ab1,Pfn2,Pin1,Ppp2ca,Rapgef2,Sh3bp1,Sipa1l1,Smap2,Vcp
GO:0051099	positive regulation of binding	10	198	0.0027	Actr3,Eif3c,Hnrnpl,Hsp90ab1,Hspa4,Mapre3,Park7,Ppp2ca,Rapgef2,Trim28
GO:0045664	regulation of neuron differentiation	21	714	0.003	Actr3,Ap2a1,Atp8a2,Cfl1,Cpne6,Dpysl2,Dpysl3,Eef1a1,Gdi1,Gfap,Itpka,L1cam,Mag,Ntm,Ntrk2,Rac1,Rapgef2,Rims1,Sipa1l1,Ube2v2,Ywhag
GO:0061732	mitochondrial acetyl-CoA biosynthetic process from pyruvate	3	8	0.003	Dlat,Dld,Pdha1
GO:0048709	oligodendrocyte differentiation	6	69	0.0033	Cd9,Cnp,Cntnap1,Mag,Ntrk2,Plp1
GO:0030534	adult behavior	9	167	0.0034	Abat,Adam22,Atp1a2,Atp1a3,Cnp,Dnm1,Park7,Slc1a2,Uchl1
GO:0008344	adult locomotory behavior	7	99	0.0035	Adam22,Atp1a2,Atp1a3,Cnp,Dnm1,Park7,Uchl1
GO:0034329	cell junction assembly	7	100	0.0036	Actn1,Cd9,Cdc42,Cntnap1,Fscn1,Nfasc,Sh3bp1
GO:0043524	negative regulation of neuron apoptotic process	9	168	0.0036	Coro1a,Hsp90ab1,Hsph1,Mag,Ntrk2,Park7,Pin1,Prkcg,Ube2v2
GO:0030100	regulation of endocytosis	11	248	0.0038	Ap2a1,Ap2b1,Ap2m1,Dnajc6,Dnm1,Hspa8,Necab2,Nsf,Prkcg,Sirpa,Trf
GO:0030388	fructose 1,6-bisphosphate metabolic process	3	9	0.0039	Aldoa,Pfkl,Pfkp
GO:0086036	regulation of cardiac muscle cell membrane potential	3	9	0.0039	Atp1a3,Atp2a2,Slc8a1
GO:1901660	calcium ion export	3	9	0.0039	Atp2b1,Atp2b2,Slc8a1
GO:0061564	axon development	13	337	0.004	Afg3l2,Atp8a2,Cnp,Dpysl2,Hsp90ab1,L1cam,Lgi1,Nfasc,Plp1,Rac1,Sept7,Tubb3,Uchl1
GO:0043085	positive regulation of catalytic activity	30	1239	0.0041	Atp1b1,Atp1b2,Atp1b3,Cdc42,Cops8,Dnaja2,Dynll1,Dynll2,Eef1a2,Fis1,Gdi1,Gdi2,Gnai2,Gnao1,Hpca,Hsp90ab1,Hspa8,Hsph1,Mapre3,Park7,Pfn2,Pin1,Ppp2ca,Rac1,Rapgef2,Sh3bp1,Sipa1l1,Smap2,Trf,Vcp
GO:0099504	synaptic vesicle cycle	7	103	0.0042	Ap2m1,Cadps,Cplx1,Dnajc6,Dnm1,Rims1,Slc32a1
GO:0034762	regulation of transmembrane transport	17	530	0.0043	Atp1a2,Atp1b1,Atp1b2,Atp1b3,Cfl1,Coro1a,Gbas,Gpd1l,Hk1,Hpca,Kcnab2,Park7,Ppp2ca,Scn2b,Slc1a2,Slc8a1,Ywhaq
GO:0006941	striated muscle contraction	7	104	0.0044	Aldoa,Atp1a3,Atp1b1,Atp8a2,Gpd1l,Scn2b,Slc8a1
GO:0032092	positive regulation of protein binding	7	104	0.0044	Actr3,Hsp90ab1,Hspa4,Mapre3,Park7,Ppp2ca,Rapgef2
GO:0034622	cellular protein-containing complex assembly	20	687	0.0045	Ap2b1,Cadps,Celf4,Cltc,Cops8,Dmxl2,Dnm1,Dync1h1,Hsp90ab1,Hspa4,Ndufb7,Ndufb8,Ndufs8,Psmd4,Ptbp2,Rac1,Rims1,Rps17,Tppp3,Vbp1
GO:0055085	transmembrane transport	27	1073	0.0045	Afg3l2,Atp1a2,Atp1a3,Atp1b1,Atp1b2,Atp1b3,Atp2a2,Atp2b1,Atp2b2,Atp5e,Atp5o,Atp6v1b2,Atp6v1c1,Gm10221,Gria3,Hpx,Hspa8,Kcnab2,Scn2b,Slc1a2,Slc25a3,Slc25a5,Slc30a9,Slc32a1,Slc6a17,Slc8a1,Trf
GO:0048667	cell morphogenesis involved in neuron differentiation	14	389	0.0046	Afg3l2,Atp2b2,Atp8a2,Cdc42,Cnp,Dpysl2,Hsp90ab1,L1cam,Lgi1,Nfasc,Rac1,Sept7,Tubb3,Uchl1
GO:0010769	regulation of cell morphogenesis involved in differentiation	12	299	0.0047	Actr3,Cdc42,Cfl1,Dpysl2,Gdi1,Itpka,L1cam,Mag,Ntrk2,Rac1,Rapgef2,Sipa1l1
GO:0030834	regulation of actin filament depolymerization	5	48	0.0047	Capzb,Cfl1,Cfl2,Dstn,Sh3bp1
GO:0120033	negative regulation of plasma membrane bounded cell projection assembly	4	26	0.0047	Actr3,Capzb,Cfl1,Pfn2
GO:0006002	fructose 6-phosphate metabolic process	3	10	0.0048	Mpi,Pfkl,Pfkp
GO:0006531	aspartate metabolic process	3	10	0.0048	Adssl1,Ass1,Got2
GO:0016032	viral process	8	140	0.0048	Ctsb,Eea1,Eif3f,Hsp90ab1,Pcbp2,Rab7,Ssb,Vcp
GO:0042592	homeostatic process	34	1494	0.0048	Afg3l2,Aldoa,Atp1a2,Atp1a3,Atp1b1,Atp1b2,Atp1b3,Atp2a2,Atp2b1,Atp2b2,Cfl2,Coro1a,Dctn1,Dld,Dmxl2,Fis1,Glrx5,Gng3,Gpd1l,Hk1,Hpx,Hsp90ab1,Ncdn,P4hb,Park7,Ppp2ca,Prdx5,Rab7,Rac1,Rps17,Scn2b,Slc30a9,Slc8a1,Trf
GO:0075522	IRES-dependent viral translational initiation	3	10	0.0048	Eif3f,Pcbp2,Ssb
GO:0051489	regulation of filopodium assembly	5	49	0.005	Actr3,Capzb,Cdc42,Dpysl3,Fscn1
GO:1901214	regulation of neuron death	13	348	0.0051	Ap2b1,Cdc42,Coro1a,Fis1,Hsp90ab1,Hsph1,Mag,Ntrk2,Park7,Pin1,Prkcg,Ube2m,Ube2v2
GO:0006536	glutamate metabolic process	4	27	0.0052	Aldh5a1,Gad2,Glud1,Got2
GO:0051588	regulation of neurotransmitter transport	7	108	0.0052	Abat,Atp2a2,Gfap,Gpm6b,Ntrk2,Pfn2,Rims1
GO:0032989	cellular component morphogenesis	21	752	0.0053	Actn1,Afg3l2,Atp2b2,Atp8a2,Cadm1,Capzb,Cd9,Cdc42,Cfl2,Cnp,Cntnap1,Dpysl2,Fis1,Hsp90ab1,L1cam,Lgi1,Nfasc,Rac1,Sept7,Tubb3,Uchl1
GO:0007017	microtubule-based process	18	595	0.0054	Actr3,Ap1g1,Arl3,Cdc42,Cltc,Cnp,Dctn1,Dync1h1,Dynll1,Dynll2,Kpnb1,Ppp2r1a,Tppp3,Tuba4a,Tuba8,Tubb3,Uchl1,Vbp1
GO:0045861	negative regulation of proteolysis	13	350	0.0054	Cst3,Glg1,Hsp90ab1,Hspa1b,Lxn,Park7,Pebp1,Prdx5,Prkcg,Pzp,Rpl23,Serpinb6a,Usp14
GO:0098693	regulation of synaptic vesicle cycle	5	50	0.0054	Ap2m1,Atp2a2,Dnm1,Pfn2,Rims1
GO:0099003	vesicle-mediated transport in synapse	7	109	0.0054	Ap2m1,Cadps,Cplx1,Dnajc6,Dnm1,Dpysl2,Rims1
GO:0042026	protein refolding	3	11	0.0058	Dnaja2,Hspa1b,Hspa8
GO:0019058	viral life cycle	6	79	0.0059	Ctsb,Eea1,Hsp90ab1,Pcbp2,Rab7,Vcp
GO:0007409	axonogenesis	12	310	0.006	Afg3l2,Atp8a2,Cnp,Dpysl2,Hsp90ab1,L1cam,Lgi1,Nfasc,Rac1,Sept7,Tubb3,Uchl1
GO:0008361	regulation of cell size	9	184	0.006	Actr3,Atp2b2,Cfl1,Dpysl2,Gdi1,Hsp90ab1,L1cam,Mag,Rac1
GO:0033157	regulation of intracellular protein transport	10	224	0.006	Actr3,Cdc42,Dctn1,Fis1,Gdi1,Hpca,Hsp90ab1,Park7,Ppp2ca,Trim28
GO:0007041	lysosomal transport	6	80	0.0061	Ap1g1,Hspa8,Rab7,Rhob,Vcp,Vipas39
GO:0007610	behavior	19	655	0.0061	Abat,Adam22,Atp1a2,Atp1a3,Atp2b2,Atp8a2,Cnp,Cst3,Dctn1,Dnm1,Glud1,Gnao1,Ntrk2,Park7,Pebp1,Prkcg,Slc1a2,Synpo,Uchl1
GO:0009410	response to xenobiotic stimulus	10	225	0.0061	Abat,Ass1,Dpysl2,Gnao1,Got2,Gstm5,Hpca,Hsp90ab1,Prkcg,Slc8a1
GO:0034330	cell junction organization	8	147	0.0061	Actn1,Cd9,Cdc42,Cntnap1,Fscn1,Nfasc,Rac1,Sh3bp1
GO:0060047	heart contraction	6	80	0.0061	Atp1a3,Atp1b1,Cdc42,Gpd1l,Scn2b,Slc8a1
GO:0030003	cellular cation homeostasis	17	554	0.0063	Afg3l2,Atp1a2,Atp1a3,Atp1b1,Atp1b2,Atp1b3,Atp2a2,Atp2b1,Atp2b2,Dmxl2,Fis1,Gng3,Hpx,Rab7,Slc30a9,Slc8a1,Trf
GO:0031334	positive regulation of protein complex assembly	10	226	0.0063	Actr3,Arpc1a,Cand1,Dctn1,Fscn1,Hspa1b,Pfn2,Rac1,Rims1,Vcp
GO:1902600	proton transmembrane transport	7	113	0.0064	Atp1a2,Atp5e,Atp5o,Atp6v1b2,Atp6v1c1,Gm10221,Slc32a1
GO:0051017	actin filament bundle assembly	5	53	0.0066	Actn1,Cdc42,Dpysl3,Fscn1,Sh3bp1
GO:0060284	regulation of cell development	25	992	0.0066	Actr3,Ap2a1,Atp8a2,Cdc42,Cfl1,Cpne6,Dpysl2,Dpysl3,Eef1a1,Gdi1,Gfap,Itpka,L1cam,Mag,Ntm,Ntrk2,Pin1,Ppp2r1a,Rac1,Rapgef2,Rims1,Sipa1l1,Trf,Ube2v2,Ywhag
GO:1901215	negative regulation of neuron death	10	228	0.0066	Ap2b1,Coro1a,Hsp90ab1,Hsph1,Mag,Ntrk2,Park7,Pin1,Prkcg,Ube2v2
GO:1903828	negative regulation of cellular protein localization	7	114	0.0066	Ap2m1,Cltc,Gdi1,Gpm6b,Hsph1,Park7,Ppp2ca
GO:0033240	positive regulation of cellular amine metabolic process	3	12	0.0068	Abat,Park7,Pebp1
GO:0043393	regulation of protein binding	10	229	0.0068	Actr3,Cdc42,Ckmt1,Hsp90ab1,Hspa4,Mapre3,Park7,Pin1,Ppp2ca,Rapgef2
GO:0055082	cellular chemical homeostasis	19	663	0.0068	Afg3l2,Atp1a2,Atp1a3,Atp1b1,Atp1b2,Atp1b3,Atp2a2,Atp2b1,Atp2b2,Dmxl2,Fis1,Gng3,Hk1,Hpx,Ppp2ca,Rab7,Slc30a9,Slc8a1,Trf
GO:0007626	locomotory behavior	10	230	0.0069	Abat,Adam22,Atp1a2,Atp1a3,Atp2b2,Cnp,Dnm1,Gnao1,Park7,Uchl1
GO:0032271	regulation of protein polymerization	9	189	0.0069	Actr3,Arpc1a,Capzb,Cfl1,Coro1a,Dctn1,Hspa1b,Pfn2,Rac1
GO:0002026	regulation of the force of heart contraction	4	31	0.0077	Atp1a2,Atp2a2,Pebp1,Slc8a1
GO:1903427	negative regulation of reactive oxygen species biosynthetic process	4	31	0.0077	Dynll1,Eef1a1,Khsrp,Park7
GO:0051650	establishment of vesicle localization	8	154	0.0078	Ap2m1,Cadps,Cplx1,Dctn1,Dnm1,Dpysl2,Dync1h1,Rims1
GO:0006540	glutamate decarboxylation to succinate	2	2	0.008	Aldh5a1,Gad2
GO:0010882	regulation of cardiac muscle contraction by calcium ion signaling	3	13	0.008	Atp1b1,Atp2a2,Slc8a1
GO:0019932	second-messenger-mediated signaling	10	235	0.008	Atp1b1,Atp2a2,Fis1,Gnai2,Hpca,Ncald,Ntrk2,Ppp3r1,Rapgef2,Slc8a1
GO:0031623	receptor internalization	5	56	0.008	Ap2b1,Ap2m1,Cd9,Cltc,Dnm1
GO:0034641	cellular nitrogen compound metabolic process	74	4247	0.008	Acly,Adssl1,Aldh5a1,Aldoa,Ass1,Atp1a2,Atp1b1,Atp2b2,Atp5e,Atp5o,Atp6v1b2,Celf4,Cnp,Cs,Ctbp1,Ddah1,Dlat,Dld,Dynll1,Eef1a1,Eef1a2,Eef1g,Eif3c,Eif3f,Fasn,Gbas,Gm10221,Gpd1,Gpd1l,Gstm5,Hint1,Hk1,Hnrnpl,Hsp90ab1,Hspa8,Idh3g,Kcnab2,Khsrp,Mdh2,Mpi,Ndufb8,Ndufv1,Nudt3,Ogdh,Pabpc1,Park7,Pcmt1,Pdha1,Pfkl,Pfkp,Pgam1,Pkm,Prdx5,Prps1,Ptbp2,Qdpr,Rpl23,Rps17,Sdha,Sh3bp1,Slc30a9,Smarcc2,Snrnp200,Ssb,Suclg1,Tardb…
GO:0042177	negative regulation of protein catabolic process	7	119	0.008	Cst3,Hsp90ab1,Park7,Pin1,Prkcg,Rpl23,Usp14
GO:0046168	glycerol-3-phosphate catabolic process	2	2	0.008	Gpd1,Gpd1l
GO:0051656	establishment of organelle localization	12	324	0.008	Actr3,Ap2m1,Cadps,Cdc42,Cplx1,Dctn1,Dnm1,Dpysl2,Dync1h1,Kpnb1,Rims1,Uchl1
GO:0044267	cellular protein metabolic process	56	2995	0.0082	Adh5,Afg3l2,Camkv,Cand1,Capn2,Cfl1,Cops8,Ctbp1,Ctsb,Ddah1,Dld,Dnajc6,Eef1a1,Eef1a2,Eef1g,Eif3c,Eif3f,Fbxl16,Glrx5,Hectd3,Hk1,Hspa8,Itpka,Mdh2,Mpi,Ntrk2,Ogdh,P4hb,Park7,Pcbp2,Pcmt1,Pebp1,Pgp,Pin1,Ppp1cb,Ppp2ca,Ppp2r1a,Ppp3r1,Prkcg,Psma5,Psmd4,Rab7,Rpl23,Rps17,Sh3bp1,Trf,Trim28,Trio,Uba1,Ube2m,Ube2v2,Uchl1,Usp14,Vars,Vcp,Vipas39
GO:0051239	regulation of multicellular organismal process	54	2858	0.0082	Abat,Actr3,Afg3l2,Ap2a1,Ap2a2,Atp1a2,Atp1b1,Atp2a2,Atp8a2,Cadm1,Cd9,Cdc42,Celf4,Cfl1,Cpne6,Cst3,Ddah1,Dpysl2,Dpysl3,Eef1a1,Gdi1,Gfap,Glg1,Gnai2,Gnao1,Gpd1l,Gpm6b,Hk1,Hsp90ab1,Itpka,Khsrp,L1cam,Mag,Ntm,Ntrk2,Park7,Pebp1,Pfn2,Pin1,Ppp2ca,Ppp2r1a,Rac1,Rapgef2,Rhob,Rims1,Rnh1,Scn2b,Sept7,Sh3bp1,Sipa1l1,Slc8a1,Trf,Ube2v2,Ywhag
GO:0032990	cell part morphogenesis	15	470	0.0083	Afg3l2,Atp8a2,Cdc42,Cnp,Cntnap1,Dpysl2,Fis1,Hsp90ab1,L1cam,Lgi1,Nfasc,Rac1,Sept7,Tubb3,Uchl1
GO:0099537	trans-synaptic signaling	12	328	0.0087	Cadps,Cplx1,Dnm1,Gria3,Ntrk2,Park7,Prkcg,Rac1,Rims1,Syn2,Syn3,Usp14
GO:1905475	regulation of protein localization to membrane	8	158	0.0087	Actr3,Ap2b1,Ap2m1,Cltc,Fis1,Gdi1,Hpca,Necab2
GO:1904951	positive regulation of establishment of protein localization	14	424	0.0088	Abat,Actr3,Cadm1,Cct3,Cct7,Cdc42,Dctn1,Dynll1,Fis1,Glud1,Hk1,Hpca,Hsp90ab1,Trim28
GO:0051098	regulation of binding	13	376	0.0089	Actr3,Cdc42,Ckmt1,Eif3c,Hnrnpl,Hsp90ab1,Hspa4,Mapre3,Park7,Pin1,Ppp2ca,Rapgef2,Trim28
GO:1901360	organic cyclic compound metabolic process	71	4057	0.009	Acaa1a,Acly,Adssl1,Aldoa,Atp1a2,Atp1b1,Atp2b2,Atp5e,Atp5o,Atp6v1b2,Celf4,Cnp,Cs,Ctbp1,Dlat,Dld,Dynll1,Fah,Fasn,Gbas,Gm10221,Got2,Gpd1,Gpd1l,Gstm5,Hdlbp,Hint1,Hk1,Hnrnpl,Hpx,Hsp90ab1,Hspa8,Idh3g,Kcnab2,Khsrp,Mdh2,Mpi,Ndufb8,Ndufv1,Nudt3,Oat,Ogdh,Pabpc1,Park7,Pcmt1,Pdha1,Pfkl,Pfkp,Pgam1,Pkm,Prdx5,Prps1,Ptbp2,Qdpr,Rps17,Sdha,Sh3bp1,Slc30a9,Smarcc2,Snrnp200,Ssb,Suclg1,Tardbp,Tpi1,Trim28,Ube2v2,Uqcrc1…
GO:0009109	coenzyme catabolic process	3	14	0.0093	Cbr3,Sh3bp1,Vcp
GO:0070201	regulation of establishment of protein localization	19	686	0.0093	Abat,Actr3,Cadm1,Cct3,Cct7,Cdc42,Dctn1,Dynll1,Fis1,Gdi1,Glud1,Hk1,Hpca,Hsp90ab1,Hsph1,Park7,Pfkl,Ppp2ca,Trim28
GO:0045428	regulation of nitric oxide biosynthetic process	5	59	0.0094	Ass1,Ddah1,Dynll1,Hsp90ab1,Khsrp
GO:0032388	positive regulation of intracellular transport	9	201	0.0097	Actr3,Cdc42,Dctn1,Dync1h1,Fis1,Hpca,Hsp90ab1,Rims1,Trim28
GO:0048812	neuron projection morphogenesis	14	429	0.0097	Afg3l2,Atp8a2,Cdc42,Cnp,Cntnap1,Dpysl2,Hsp90ab1,L1cam,Lgi1,Nfasc,Rac1,Sept7,Tubb3,Uchl1
GO:0006911	phagocytosis, engulfment	4	34	0.0098	Cdc42,Rac1,Sh3bp1,Sirpa
GO:0009894	regulation of catabolic process	20	745	0.0098	Cdc42,Cst3,Gfap,Gpd1,Hsp90ab1,Khsrp,Nsf,Pabpc1,Park7,Pgam1,Pin1,Ppp1cb,Ppp2ca,Prkcg,Rab7,Rpl23,Tardbp,Ube2v2,Usp14,Vcp
GO:0048259	regulation of receptor-mediated endocytosis	6	90	0.0098	Ap2a1,Ap2m1,Dnajc6,Necab2,Nsf,Trf
GO:0051491	positive regulation of filopodium assembly	4	34	0.0098	Actr3,Cdc42,Dpysl3,Fscn1
GO:0061077	chaperone-mediated protein folding	5	60	0.0099	Cct3,Cct7,Chordc1,Hspa8,Hsph1
GO:0061640	cytoskeleton-dependent cytokinesis	5	60	0.0099	Actr3,Arl3,Cfl1,Rhob,Sept7
GO:0120031	plasma membrane bounded cell projection assembly	12	335	0.01	Actr3,Arl3,Capzb,Cdc42,Dctn1,Dynll1,Dynll2,Fscn1,Rac1,Rapgef2,Sept7,Sh3bp1
GO:0048489	synaptic vesicle transport	6	91	0.0101	Ap2m1,Cadps,Cplx1,Dnm1,Dpysl2,Rims1
GO:0070887	cellular response to chemical stimulus	45	2287	0.0101	Actr3,Adh5,Adssl1,Ass1,Atp1a2,Atp1a3,Atp2a2,Atp2b1,Capn2,Cdc42,Cfl1,Coro1a,Cpne6,Cst3,Ctsb,Dpysl3,Eef1a1,Elmo2,Fasn,Fis1,Gnai2,Gpd1,Gstm5,Hpca,Hsp90ab1,Khsrp,Ntrk2,P4hb,Park7,Pfkp,Pkm,Ppp2ca,Prdx5,Qdpr,Rac1,Rapgef2,Rhob,Rpl23,Sh3bp1,Slc25a5,Slc8a1,Syngr1,Trf,Vcp,Ywhag
GO:0010970	transport along microtubule	7	126	0.0103	Arl3,Cdc42,Dctn1,Dync1h1,Dynll1,Dynll2,Uchl1
GO:0006458	'de novo' protein folding	4	35	0.0105	Cct3,Cct7,Hspa8,Hsph1
GO:0050767	regulation of neurogenesis	22	864	0.0105	Actr3,Ap2a1,Atp8a2,Cfl1,Cpne6,Dpysl2,Dpysl3,Eef1a1,Gdi1,Gfap,Itpka,L1cam,Mag,Ntm,Ntrk2,Rac1,Rapgef2,Rims1,Sipa1l1,Trf,Ube2v2,Ywhag
GO:0060236	regulation of mitotic spindle organization	4	35	0.0105	Cltc,Dctn1,Dync1h1,Hspa1b
GO:0086009	membrane repolarization	3	15	0.0105	Atp1b1,Atp1b2,Atp1b3
GO:0006725	cellular aromatic compound metabolic process	68	3879	0.0107	Acly,Adssl1,Aldoa,Atp1a2,Atp1b1,Atp2b2,Atp5e,Atp5o,Atp6v1b2,Celf4,Cnp,Cs,Ctbp1,Dlat,Dld,Dynll1,Fah,Fasn,Gbas,Gm10221,Got2,Gpd1,Gpd1l,Gstm5,Hint1,Hk1,Hnrnpl,Hpx,Hsp90ab1,Hspa8,Idh3g,Kcnab2,Khsrp,Mdh2,Mpi,Ndufb8,Ndufv1,Nudt3,Ogdh,Pabpc1,Park7,Pcmt1,Pdha1,Pfkl,Pfkp,Pgam1,Pkm,Prdx5,Prps1,Ptbp2,Qdpr,Rps17,Sdha,Sh3bp1,Slc30a9,Smarcc2,Snrnp200,Ssb,Suclg1,Tardbp,Tpi1,Trim28,Ube2v2,Uqcrc1,Uqcrh,Vars,Vcp,V…
GO:0008016	regulation of heart contraction	8	165	0.0107	Atp1a2,Atp1b1,Atp2a2,Gnao1,Gpd1l,Pebp1,Scn2b,Slc8a1
GO:0043270	positive regulation of ion transport	11	293	0.0107	Abat,Atp1b1,Atp1b2,Atp1b3,Atp2b2,Atp8a2,Cfl1,Dpysl2,Gbas,Gpd1l,Park7
GO:0051260	protein homooligomerization	12	339	0.0107	Aldh5a1,Aldoa,Atl3,Dpysl3,Eef1a1,Fis1,Lgi1,Pfkl,Pfkp,Pkm,Slc1a2,Vcp
GO:0051591	response to cAMP	6	93	0.0109	Ass1,Bsg,Gpd1,Pebp1,Rapgef2,Slc8a1
GO:0051924	regulation of calcium ion transport	10	249	0.0109	Atp1a2,Atp1b1,Atp2b2,Coro1a,Gbas,Gnai2,Gnao1,Hpca,Ppp2ca,Slc8a1
GO:0007339	binding of sperm to zona pellucida	4	36	0.0112	Aldoa,Cct3,Cct7,Hspa1b
GO:2000008	regulation of protein localization to cell surface	4	36	0.0112	Gpd1l,Gpm6b,Hsp90ab1,Kcnab2
GO:0006875	cellular metal ion homeostasis	15	492	0.0116	Afg3l2,Atp1a2,Atp1a3,Atp1b1,Atp1b2,Atp1b3,Atp2a2,Atp2b1,Atp2b2,Fis1,Gng3,Hpx,Slc30a9,Slc8a1,Trf
GO:0007265	Ras protein signal transduction	7	130	0.0116	Cdc42,Gdi1,Kpnb1,Rac1,Rap2b,Rapgef2,Trim28
GO:0010038	response to metal ion	12	344	0.0116	Abat,Ass1,Bsg,Cpne6,Gdi1,Glud1,Hpca,Park7,Pebp1,Ppp2ca,Qdpr,Trf
GO:0031547	brain-derived neurotrophic factor receptor signaling pathway	2	3	0.0116	Ntrk2,Rapgef2
GO:0046683	response to organophosphorus	7	130	0.0116	Ass1,Bsg,Gpd1,Pebp1,Rapgef2,Sh3bp1,Slc8a1
GO:0110095	cellular detoxification of aldehyde	2	3	0.0116	Adh5,Park7
GO:1900126	negative regulation of hyaluronan biosynthetic process	2	3	0.0116	Ap2a1,Cltc
GO:1903279	regulation of calcium:sodium antiporter activity	2	3	0.0116	Atp1a2,Atp1b1
GO:0050801	ion homeostasis	19	706	0.0117	Afg3l2,Atp1a2,Atp1a3,Atp1b1,Atp1b2,Atp1b3,Atp2a2,Atp2b1,Atp2b2,Dmxl2,Fis1,Gng3,Gpd1l,Hpx,Rab7,Scn2b,Slc30a9,Slc8a1,Trf
GO:0000902	cell morphogenesis	18	652	0.0118	Actn1,Afg3l2,Atp2b2,Atp8a2,Cadm1,Capzb,Cdc42,Cnp,Cntnap1,Dpysl2,Hsp90ab1,L1cam,Lgi1,Nfasc,Rac1,Sept7,Tubb3,Uchl1
GO:0001504	neurotransmitter uptake	3	16	0.0118	Atp1a2,Park7,Slc1a2
GO:0006525	arginine metabolic process	3	16	0.0118	Ass1,Ddah1,Fah
GO:0008652	cellular amino acid biosynthetic process	5	64	0.012	Abat,Ass1,Glud1,Got2,Oat
GO:0048523	negative regulation of cellular process	74	4336	0.0123	Abat,Actn1,Actr3,Ap2a1,Ap2b1,Ass1,Capzb,Cd9,Celf4,Cfl1,Chordc1,Ckmt1,Cltc,Cops8,Coro1a,Cst3,Ctbp1,Ctsb,Ddah1,Dnm1,Dpysl3,Dynll1,Eef1a1,Gdi1,Gfap,Glg1,Gnai2,Gpd1l,Hk1,Hnrnpl,Hpca,Hsp90ab1,Hspa1b,Hspa4,Hspa8,Hsph1,Khsrp,Lxn,Mag,Necab2,Ntm,Ntrk2,Pabpc1,Park7,Pcmt1,Pebp1,Pfkl,Pfn2,Pgp,Pin1,Ppp2ca,Prdx5,Prkcg,Ptbp2,Pzp,Rab7,Rap2b,Rapgef2,Rhob,Rpl23,Serpinb6a,Sh3bp1,Slc25a5,Smarcc2,Tagln3,Tardbp,Tpt1,T…
GO:0007422	peripheral nervous system development	5	65	0.0127	Adam22,Cntnap1,Nfasc,Ntrk2,Ppp3r1
GO:0043467	regulation of generation of precursor metabolites and energy	6	97	0.0127	Cisd1,Gpd1,Park7,Pgam1,Ppp1cb,Vcp
GO:0045216	cell-cell junction organization	7	133	0.0129	Actn1,Cd9,Cdc42,Cntnap1,Fscn1,Nfasc,Rac1
GO:0030162	regulation of proteolysis	19	716	0.0134	Cfl1,Cst3,Fis1,Glg1,Hsp90ab1,Hspa1b,Hspa8,Lxn,Park7,Pebp1,Ppp2ca,Prdx5,Prkcg,Pzp,Rpl23,Serpinb6a,Ube2v2,Usp14,Vcp
GO:0007568	aging	10	259	0.0135	Abat,Ass1,Atp2b1,Atp8a2,Cnp,Dld,Gnao1,Pebp1,Slc1a2,Slc32a1
GO:0009084	glutamine family amino acid biosynthetic process	3	17	0.0135	Ass1,Glud1,Oat
GO:0019079	viral genome replication	3	17	0.0135	Eea1,Pcbp2,Vcp
GO:1903051	negative regulation of proteolysis involved in cellular protein catabolic process	5	66	0.0135	Hsp90ab1,Park7,Prkcg,Rpl23,Usp14
GO:0010765	positive regulation of sodium ion transport	4	39	0.014	Atp1b1,Atp1b2,Atp1b3,Gpd1l
GO:0014003	oligodendrocyte development	4	39	0.014	Cd9,Cntnap1,Mag,Plp1
GO:0090313	regulation of protein targeting to membrane	4	39	0.014	Actr3,Fis1,Gdi1,Hpca
GO:0030833	regulation of actin filament polymerization	7	136	0.0141	Actr3,Arpc1a,Capzb,Cfl1,Coro1a,Pfn2,Rac1
GO:0048168	regulation of neuronal synaptic plasticity	5	67	0.0141	Ncdn,Rac1,Rims1,Syngr1,Synpo
GO:0060048	cardiac muscle contraction	5	67	0.0141	Atp1a3,Atp1b1,Gpd1l,Scn2b,Slc8a1
GO:0000904	cell morphogenesis involved in differentiation	15	506	0.0142	Actn1,Afg3l2,Atp2b2,Atp8a2,Cdc42,Cnp,Dpysl2,Hsp90ab1,L1cam,Lgi1,Nfasc,Rac1,Sept7,Tubb3,Uchl1
GO:0022603	regulation of anatomical structure morphogenesis	24	1009	0.0142	Actr3,Aldoa,Capzb,Cdc42,Cfl1,Coro1a,Cpne6,Cst3,Ddah1,Dpysl2,Fis1,Gdi1,Itpka,L1cam,Mag,Ntrk2,Rac1,Rapgef2,Rhob,Rims1,Rnh1,Sept7,Sipa1l1,Vat1
GO:0050793	regulation of developmental process	47	2475	0.0142	Actr3,Afg3l2,Aldoa,Ap2a1,Ap2a2,Atp8a2,Capzb,Cdc42,Celf4,Cfl1,Coro1a,Cpne6,Cst3,Ddah1,Dpysl2,Dpysl3,Eef1a1,Fis1,Gdi1,Gfap,Glg1,Gpm6b,Hsp90ab1,Itpka,L1cam,Mag,Ntm,Ntrk2,Ociad1,Pin1,Ppp2ca,Ppp2r1a,Rac1,Rapgef2,Rhob,Rims1,Rnh1,Sept7,Sipa1l1,Slc8a1,Tmsb4x,Tpt1,Trf,Trio,Ube2v2,Vat1,Ywhag
GO:0044262	cellular carbohydrate metabolic process	7	137	0.0146	Hk1,Itpka,Pfkl,Pfkp,Pgp,Ppp1cb,Tpi1
GO:0051653	spindle localization	4	40	0.0149	Actr3,Dctn1,Dync1h1,Kpnb1
GO:0022010	central nervous system myelination	3	18	0.015	Cntnap1,Mag,Plp1
GO:0090075	relaxation of muscle	3	18	0.015	Atp1b1,Atp2a2,Slc8a1
GO:0014823	response to activity	5	69	0.0155	Adssl1,Cfl1,Got2,Pebp1,Uqcrc1
GO:0043254	regulation of protein complex assembly	13	409	0.0155	Actr3,Arpc1a,Cand1,Capzb,Cfl1,Coro1a,Dctn1,Fscn1,Hspa1b,Pfn2,Rac1,Rims1,Vcp
GO:0016185	synaptic vesicle budding from presynaptic endocytic zone membrane	2	4	0.0159	Ap2m1,Dnm1
GO:0032269	negative regulation of cellular protein metabolic process	24	1020	0.0159	Chordc1,Cst3,Ctbp1,Glg1,Gnai2,Gpd1l,Hsp90ab1,Hspa1b,Hspa4,Hsph1,Khsrp,Lxn,Park7,Pebp1,Pin1,Ppp2ca,Prdx5,Prkcg,Pzp,Rpl23,Serpinb6a,Tardbp,Uchl1,Usp14
GO:0051187	cofactor catabolic process	4	41	0.0159	Cbr3,Prdx5,Sh3bp1,Vcp
GO:0106077	histone succinylation	2	4	0.0159	Dld,Ogdh
GO:1903751	negative regulation of intrinsic apoptotic signaling pathway in response to hydrogen peroxide	2	4	0.0159	Hsph1,Park7
GO:2000152	regulation of ubiquitin-specific protease activity	2	4	0.0159	Park7,Vcp
GO:0010941	regulation of cell death	34	1640	0.0161	Ap2b1,Cdc42,Ckmt1,Coro1a,Cst3,Ctsb,Eef1a1,Eef1a2,Fis1,Gnai2,Hk1,Hsp90ab1,Hspa1b,Hspa4,Hspa8,Hsph1,Mag,Ntrk2,P4hb,Park7,Pcmt1,Pin1,Ppp2ca,Ppp2r1a,Prdx5,Prkcg,Rapgef2,Rhob,Slc25a5,Tardbp,Tpt1,Ube2m,Ube2v2,Vcp
GO:0017158	regulation of calcium ion-dependent exocytosis	5	70	0.0161	Atp2a2,Cadps,Gnai2,Pfn2,Rims1
GO:0051054	positive regulation of DNA metabolic process	9	223	0.0161	Cct3,Cct7,Cdc42,Cst3,Hsp90ab1,Prkcg,Rac1,Trim28,Ube2v2
GO:0006839	mitochondrial transport	8	181	0.0163	Afg3l2,Atp5o,Cnp,Fis1,Hspa4,Kbp,Slc25a3,Slc25a5
GO:0003008	system process	31	1454	0.0166	Abat,Adh5,Aldoa,Atp1a2,Atp1a3,Atp1b1,Atp2a2,Atp2b2,Atp8a2,Cbr3,Cdc42,Cntnap1,Dctn1,Ddah1,Dnm1,Glud1,Gnai2,Gpd1l,Gria3,Kcnab2,Lxn,N28178,Ncald,Nfasc,Ntrk2,Prkcg,Scn2b,Serpinb6a,Slc8a1,Synpo,Uchl1
GO:0035089	establishment of apical/basal cell polarity	3	19	0.0167	Cdc42,Fscn1,Sh3bp1
GO:0043604	amide biosynthetic process	13	414	0.0167	Acly,Ass1,Dlat,Dld,Eef1a1,Eef1a2,Eef1g,Eif3c,Eif3f,Pdha1,Rpl23,Rps17,Vars
GO:0030900	forebrain development	13	415	0.0168	Atp1a3,Cfl1,Cnp,Dpysl2,Gnao1,Ntrk2,Ogdh,Pebp1,Rac1,Rapgef2,Slc1a2,Slc32a1,Smarcc2
GO:0046483	heterocycle metabolic process	66	3830	0.0171	Acly,Adssl1,Aldoa,Atp1a2,Atp1b1,Atp2b2,Atp5e,Atp5o,Atp6v1b2,Celf4,Cnp,Cs,Ctbp1,Dlat,Dld,Dynll1,Fasn,Gbas,Gm10221,Gpd1,Gpd1l,Hint1,Hk1,Hnrnpl,Hpx,Hsp90ab1,Hspa8,Idh3g,Kcnab2,Khsrp,Mdh2,Mpi,Ndufb8,Ndufv1,Nudt3,Oat,Ogdh,Pabpc1,Park7,Pcmt1,Pdha1,Pfkl,Pfkp,Pgam1,Pkm,Prdx5,Prps1,Ptbp2,Qdpr,Rps17,Sdha,Sh3bp1,Slc30a9,Smarcc2,Snrnp200,Ssb,Suclg1,Tardbp,Tpi1,Trim28,Ube2v2,Uqcrc1,Uqcrh,Vars,Vcp,Vipas39
GO:0050807	regulation of synapse organization	8	183	0.0171	Actr3,Cdc42,Cfl1,Dctn1,Itpka,Ntrk2,Sipa1l1,Ube2v2
GO:2000377	regulation of reactive oxygen species metabolic process	8	184	0.0176	Ass1,Ddah1,Dynll1,Eef1a1,Gnai2,Hsp90ab1,Khsrp,Park7
GO:1901652	response to peptide	13	418	0.0177	Ass1,Atp1a3,Atp2a2,Bsg,Cfl1,Dnm1,Fis1,Got2,Hnrnpl,Pkm,Qdpr,Rpl23,Ywhag
GO:0008154	actin polymerization or depolymerization	4	43	0.0178	Cfl1,Cfl2,Dstn,Rac1
GO:0090316	positive regulation of intracellular protein transport	7	144	0.0178	Actr3,Cdc42,Dctn1,Fis1,Hpca,Hsp90ab1,Trim28
GO:0051301	cell division	14	471	0.0181	Actr3,Arl3,Cfl1,Cltc,Dctn1,Dync1h1,Gnai2,Mapre3,Ppp1cb,Rhob,Sept3,Sept5,Sept6,Sept7
GO:0007268	chemical synaptic transmission	11	321	0.0182	Cadps,Cplx1,Dnm1,Gria3,Park7,Prkcg,Rac1,Rims1,Syn2,Syn3,Usp14
GO:0032411	positive regulation of transporter activity	6	107	0.0182	Atp1b1,Atp1b2,Atp1b3,Cfl1,Gbas,Park7
GO:1901615	organic hydroxy compound metabolic process	12	370	0.0182	Acaa1a,Adh5,Atp2b2,Gpd1,Hdlbp,Itpka,Nudt3,Park7,Pgp,Qdpr,Sh3bp1,Tpi1
GO:0070507	regulation of microtubule cytoskeleton organization	8	186	0.0184	Capzb,Chordc1,Cltc,Dctn1,Dync1h1,Hspa1b,Hsph1,Rac1
GO:0008333	endosome to lysosome transport	4	44	0.0189	Rab7,Rhob,Vcp,Vipas39
GO:0061001	regulation of dendritic spine morphogenesis	4	44	0.0189	Actr3,Cfl1,Itpka,Sipa1l1
GO:1903169	regulation of calcium ion transmembrane transport	7	146	0.0189	Atp1a2,Atp1b1,Coro1a,Gbas,Hpca,Ppp2ca,Slc8a1
GO:0006928	movement of cell or subcellular component	27	1223	0.0191	Actr3,Arl3,Cdc42,Cfl1,Coro1a,Dctn1,Dpysl2,Dync1h1,Dynll1,Dynll2,Elmo2,Fscn1,Gpd1l,Kpnb1,L1cam,Lgi1,Nfasc,Ntrk2,Ogdh,Rac1,Rapgef2,Scn2b,Sh3bp1,Sirpa,Tubb3,Uchl1,Vcan
GO:0048524	positive regulation of viral process	5	74	0.0191	Cfl1,Hspa8,P4hb,Pabpc1,Rab7
GO:0035690	cellular response to drug	11	325	0.0195	Adssl1,Ass1,Cfl1,Cst3,Gnai2,Hsp90ab1,Park7,Qdpr,Rhob,Sh3bp1,Slc8a1
GO:0014074	response to purine-containing compound	7	148	0.0201	Ass1,Bsg,Gpd1,Pebp1,Rapgef2,Sh3bp1,Slc8a1
GO:0002175	protein localization to paranode region of axon	2	5	0.0203	Cntnap1,Nfasc
GO:0009448	gamma-aminobutyric acid metabolic process	2	5	0.0203	Abat,Aldh5a1
GO:0019538	protein metabolic process	62	3580	0.0203	Adam22,Adh5,Afg3l2,Blmh,C1qb,Camkv,Cand1,Capn2,Cfl1,Cops8,Ctbp1,Ctsb,Ctsd,Ddah1,Dld,Dnajc6,Eef1a1,Eef1a2,Eef1g,Eif3c,Eif3f,Fbxl16,Glrx5,Hectd3,Hk1,Hpx,Hspa8,Itpka,Mdh2,Mpi,Ntrk2,Ogdh,P4hb,Park7,Pcbp2,Pcmt1,Pebp1,Pgp,Pin1,Ppp1cb,Ppp2ca,Ppp2r1a,Ppp3r1,Prkcg,Psma5,Psmd4,Rab7,Rpl23,Rps17,Sh3bp1,Trf,Trim28,Trio,Uba1,Ube2m,Ube2v2,Uchl1,Uqcrc1,Usp14,Vars,Vcp,Vipas39
GO:0030010	establishment of cell polarity	6	110	0.0203	Cdc42,Cfl1,Dctn1,Fscn1,Hsp90ab1,Sh3bp1
GO:0033864	positive regulation of NAD(P)H oxidase activity	2	5	0.0203	Gnai2,Park7
GO:0051305	chromosome movement towards spindle pole	2	5	0.0203	Actr3,Kpnb1
GO:0071205	protein localization to juxtaparanode region of axon	2	5	0.0203	Cntnap1,Nfasc
GO:0090063	positive regulation of microtubule nucleation	2	5	0.0203	Dctn1,Hspa1b
GO:0098771	inorganic ion homeostasis	17	642	0.0203	Afg3l2,Atp1a2,Atp1a3,Atp1b1,Atp1b2,Atp1b3,Atp2a2,Atp2b1,Atp2b2,Dmxl2,Fis1,Gng3,Hpx,Rab7,Slc30a9,Slc8a1,Trf
GO:1901701	cellular response to oxygen-containing compound	21	870	0.0203	Adh5,Ass1,Atp1a3,Atp2b1,Capn2,Cfl1,Cst3,Fis1,Gnai2,Gpd1,Ntrk2,Park7,Pkm,Ppp2ca,Prdx5,Rapgef2,Rhob,Rpl23,Sh3bp1,Slc8a1,Ywhag
GO:2000582	positive regulation of ATP-dependent microtubule motor activity, plus-end-directed	2	5	0.0203	Dynll1,Dynll2
GO:0010951	negative regulation of endopeptidase activity	9	235	0.0206	Cst3,Hspa1b,Lxn,Park7,Pebp1,Prdx5,Pzp,Serpinb6a,Usp14
GO:0032273	positive regulation of protein polymerization	6	111	0.0206	Actr3,Arpc1a,Dctn1,Hspa1b,Pfn2,Rac1
GO:0051246	regulation of protein metabolic process	48	2612	0.0211	Cdc42,Cfl1,Chordc1,Cops8,Cst3,Ctbp1,Eif3c,Fis1,Gfap,Glg1,Gnai2,Gpd1l,Hnrnpl,Hpx,Hsp90ab1,Hspa1b,Hspa4,Hspa8,Hsph1,Khsrp,L1cam,Lxn,Mapre3,Necab2,Nsf,Ntrk2,Park7,Pebp1,Pfn2,Pin1,Ppp2ca,Ppp2r1a,Prdx5,Prkcg,Pzp,Rab7,Rac1,Rap2b,Rapgef2,Rpl23,Serpinb6a,Tardbp,Trf,Ube2v2,Uchl1,Usp14,Vcan,Vcp
GO:0071320	cellular response to cAMP	4	46	0.0211	Ass1,Gpd1,Rapgef2,Slc8a1
GO:2000059	negative regulation of ubiquitin-dependent protein catabolic process	4	46	0.0211	Hsp90ab1,Park7,Rpl23,Usp14
GO:0043200	response to amino acid	6	112	0.0213	Ass1,Capn2,Cfl1,Hpca,Ntrk2,Slc1a2
GO:1901019	regulation of calcium ion transmembrane transporter activity	5	77	0.0215	Atp1a2,Atp1b1,Gbas,Hpca,Ppp2ca
GO:0006541	glutamine metabolic process	3	22	0.022	Adssl1,Aldh5a1,Glud1
GO:1901018	positive regulation of potassium ion transmembrane transporter activity	3	22	0.022	Atp1b1,Atp1b2,Atp1b3
GO:2000649	regulation of sodium ion transmembrane transporter activity	4	47	0.0223	Atp1a2,Atp1b1,Gpd1l,Scn2b
GO:0042133	neurotransmitter metabolic process	5	78	0.0224	Abat,Aldh5a1,Atp2b2,Ddah1,Gad2
GO:0043067	regulation of programmed cell death	31	1495	0.0225	Cdc42,Ckmt1,Coro1a,Cst3,Eef1a2,Fis1,Gnai2,Hk1,Hsp90ab1,Hspa1b,Hspa4,Hspa8,Hsph1,Mag,Ntrk2,P4hb,Park7,Pcmt1,Pin1,Ppp2ca,Ppp2r1a,Prdx5,Prkcg,Rapgef2,Rhob,Slc25a5,Tardbp,Tpt1,Ube2m,Ube2v2,Vcp
GO:0000281	mitotic cytokinesis	4	48	0.0238	Arl3,Cfl1,Rhob,Sept7
GO:0052548	regulation of endopeptidase activity	12	387	0.024	Cst3,Fis1,Hspa1b,Lxn,Park7,Pebp1,Ppp2ca,Prdx5,Pzp,Serpinb6a,Usp14,Vcp
GO:0006813	potassium ion transport	7	155	0.0242	Atp1a2,Atp1a3,Atp1b1,Atp1b2,Atp1b3,Kcnab2,Nsf
GO:0050792	regulation of viral process	7	155	0.0242	Cfl1,Hspa8,P4hb,Pabpc1,Rab7,Tardbp,Trim28
GO:0015986	ATP synthesis coupled proton transport	3	23	0.0243	Atp5e,Atp5o,Gm10221
GO:0038179	neurotrophin signaling pathway	3	23	0.0243	Coro1a,Ntrk2,Rapgef2
GO:0044057	regulation of system process	15	546	0.0243	Abat,Atp1a2,Atp1b1,Atp2a2,Celf4,Gnai2,Gnao1,Gpd1l,Mag,Pebp1,Pin1,Rims1,Scn2b,Slc8a1,Trf
GO:0006575	cellular modified amino acid metabolic process	7	156	0.0248	Aldh5a1,Ass1,Eef1g,Gstm5,P4hb,Park7,Pcmt1
GO:1901799	negative regulation of proteasomal protein catabolic process	4	49	0.0251	Hsp90ab1,Park7,Prkcg,Usp14
GO:1904528	positive regulation of microtubule binding	2	6	0.0251	Mapre3,Ppp2ca
GO:0045807	positive regulation of endocytosis	7	157	0.0254	Ap2a1,Ap2b1,Ap2m1,Dnm1,Hspa8,Sirpa,Trf
GO:0043271	negative regulation of ion transport	7	158	0.0262	Abat,Atp1a2,Gnao1,Gpm6b,Park7,Ppp2ca,Ywhaq
GO:0032268	regulation of cellular protein metabolic process	45	2443	0.0264	Cdc42,Cfl1,Chordc1,Cops8,Cst3,Ctbp1,Eif3c,Fis1,Glg1,Gnai2,Gpd1l,Hnrnpl,Hpx,Hsp90ab1,Hspa1b,Hspa4,Hspa8,Hsph1,Khsrp,L1cam,Lxn,Mapre3,Necab2,Ntrk2,Park7,Pebp1,Pfn2,Pin1,Ppp2ca,Ppp2r1a,Prdx5,Prkcg,Pzp,Rac1,Rap2b,Rapgef2,Rpl23,Serpinb6a,Tardbp,Trf,Ube2v2,Uchl1,Usp14,Vcan,Vcp
GO:0006066	alcohol metabolic process	9	247	0.0265	Adh5,Gpd1,Hdlbp,Itpka,Nudt3,Park7,Pgp,Qdpr,Tpi1
GO:0007269	neurotransmitter secretion	5	82	0.0265	Cadps,Cplx1,Rims1,Syn2,Syn3
GO:0007566	embryo implantation	4	50	0.0265	Bsg,Cst3,Pzp,Trim28
GO:0045453	bone resorption	3	24	0.0265	Ncdn,Rab7,Rac1
GO:0048747	muscle fiber development	4	50	0.0265	Afg3l2,Capzb,Slc8a1,Uchl1
GO:0060998	regulation of dendritic spine development	5	82	0.0265	Actr3,Cfl1,Itpka,Rac1,Sipa1l1
GO:1900542	regulation of purine nucleotide metabolic process	5	82	0.0265	Gpd1,Hpca,Park7,Pgam1,Vcp
GO:0007338	single fertilization	6	119	0.0267	Aldoa,Cct3,Cct7,Cd9,Hspa1b,Park7
GO:0010977	negative regulation of neuron projection development	7	160	0.0273	Actr3,Dpysl3,Gdi1,Gfap,Mag,Ntm,Rapgef2
GO:0071417	cellular response to organonitrogen compound	13	448	0.0273	Ass1,Atp1a3,Capn2,Cfl1,Fis1,Gpd1,Ntrk2,Pkm,Rapgef2,Rpl23,Sh3bp1,Slc8a1,Ywhag
GO:0072659	protein localization to plasma membrane	7	160	0.0273	Atp1b1,Atp1b3,Bsg,Efr3b,Nfasc,Rac1,Rapgef2
GO:1903305	regulation of regulated secretory pathway	6	120	0.0274	Ap1g1,Atp2a2,Cadps,Gnai2,Pfn2,Rims1
GO:0031113	regulation of microtubule polymerization	4	51	0.0275	Capzb,Dctn1,Hspa1b,Rac1
GO:0051602	response to electrical stimulus	4	51	0.0275	Adssl1,Eef1a2,Hpca,Pebp1
GO:0051129	negative regulation of cellular component organization	17	669	0.0277	Actr3,Capzb,Cfl1,Coro1a,Cst3,Ctbp1,Dpysl3,Gdi1,Gfap,Hspa8,Mag,Necab2,Ntm,Pfn2,Rapgef2,Slc25a5,Vat1
GO:0019751	polyol metabolic process	5	84	0.0283	Itpka,Nudt3,Pgp,Qdpr,Tpi1
GO:0050905	neuromuscular process	6	121	0.0283	Atp2b2,Atp8a2,Cntnap1,Dctn1,Kcnab2,Uchl1
GO:0015991	ATP hydrolysis coupled proton transport	3	25	0.0284	Atp1a2,Atp6v1b2,Atp6v1c1
GO:0022011	myelination in peripheral nervous system	3	25	0.0284	Adam22,Cntnap1,Ppp3r1
GO:0046835	carbohydrate phosphorylation	3	25	0.0284	Hk1,Pfkl,Pfkp
GO:0006749	glutathione metabolic process	4	52	0.0289	Aldh5a1,Eef1g,Gstm5,Park7
GO:1903530	regulation of secretion by cell	18	733	0.03	Abat,Ap1g1,Atp2a2,Cadm1,Cadps,Dpysl2,Dynll1,Glud1,Gnai2,Hk1,Lgi3,Nsf,Ntrk2,Pfkl,Pfn2,Rab7,Rims1,Sept5
GO:0000052	citrulline metabolic process	2	7	0.0303	Ass1,Ddah1
GO:0006094	gluconeogenesis	3	26	0.0303	Gpd1,Pgam1,Tpi1
GO:0006104	succinyl-CoA metabolic process	2	7	0.0303	Ogdh,Suclg1
GO:0006167	AMP biosynthetic process	2	7	0.0303	Adssl1,Prps1
GO:0006559	L-phenylalanine catabolic process	2	7	0.0303	Fah,Qdpr
GO:0007157	heterophilic cell-cell adhesion via plasma membrane cell adhesion molecules	4	53	0.0303	Cadm1,Cadm2,Cadm4,L1cam
GO:0010044	response to aluminum ion	2	7	0.0303	Glud1,Qdpr
GO:0017014	protein nitrosylation	2	7	0.0303	Adh5,Ddah1
GO:0038180	nerve growth factor signaling pathway	2	7	0.0303	Coro1a,Rapgef2
GO:0043457	regulation of cellular respiration	3	26	0.0303	Cisd1,Park7,Vcp
GO:0045964	positive regulation of dopamine metabolic process	2	7	0.0303	Abat,Park7
GO:0048638	regulation of developmental growth	11	353	0.0303	Actr3,Afg3l2,Atp8a2,Cfl1,Cpne6,Dpysl2,Gdi1,L1cam,Mag,Pin1,Rims1
GO:0051051	negative regulation of transport	14	509	0.0303	Abat,Atp1a2,Coro1a,Gdi1,Gnai2,Gnao1,Gpm6b,Necab2,Park7,Pfkl,Ppp2ca,Rab7,Slc25a5,Ywhaq
GO:0070995	NADPH oxidation	2	7	0.0303	Kcnab2,Prdx5
GO:0072318	clathrin coat disassembly	2	7	0.0303	Dnajc6,Hspa8
GO:0072594	establishment of protein localization to organelle	9	255	0.0303	Ap2b1,Cfl1,Fis1,Hk1,Hspa4,Hspa8,Kpnb1,Ppp3r1,Rab7
GO:0099563	modification of synaptic structure	2	7	0.0303	Cdc42,Synpo
GO:1902222	erythrose 4-phosphate/phosphoenolpyruvate family amino acid catabolic process	2	7	0.0303	Fah,Qdpr
GO:1903862	positive regulation of oxidative phosphorylation	2	7	0.0303	Park7,Vcp
GO:0007018	microtubule-based movement	9	256	0.0309	Actr3,Arl3,Cdc42,Dctn1,Dync1h1,Dynll1,Dynll2,Kpnb1,Uchl1
GO:0042981	regulation of apoptotic process	30	1476	0.0309	Cdc42,Ckmt1,Coro1a,Eef1a2,Fis1,Gnai2,Hk1,Hsp90ab1,Hspa1b,Hspa4,Hspa8,Hsph1,Mag,Ntrk2,P4hb,Park7,Pcmt1,Pin1,Ppp2ca,Ppp2r1a,Prdx5,Prkcg,Rapgef2,Rhob,Slc25a5,Tardbp,Tpt1,Ube2m,Ube2v2,Vcp
GO:0009719	response to endogenous stimulus	27	1289	0.0321	Actr3,Ass1,Atp1a2,Atp1a3,Atp2a2,Atp2b1,Bsg,Capn2,Cd9,Cfl1,Coro1a,Cst3,Ctsb,Eef1a1,Fis1,Gnai2,Got2,Gpd1,Ntrk2,Pebp1,Pkm,Qdpr,Rapgef2,Rpl23,Sh3bp1,Slc8a1,Ywhag
GO:0010770	positive regulation of cell morphogenesis involved in differentiation	7	167	0.0321	Actr3,Cdc42,Gdi1,Itpka,L1cam,Ntrk2,Rac1
GO:0006950	response to stress	51	2899	0.0322	Abat,Actr3,Adh5,Adssl1,Ass1,Atp1b1,Atp2a2,Atp2b1,C1qb,Capn2,Cd9,Cdc42,Cfl1,Coro1a,Cst3,Dnaja2,Dpysl3,Gfap,Gnao1,Gstm5,Hk1,Hnrnpl,Hsp90ab1,Hspa1b,Hspa4,Hspa4l,Hsph1,Lxn,Ndufs8,Orm1,P4hb,Park7,Pcbp2,Pebp1,Pkm,Plp1,Prdx5,Prkcg,Rac1,Rap2b,Rhob,Serpinb6a,Slc1a2,Slc8a1,Trf,Trim28,Uba1,Ube2v2,Uchl1,Usp14,Vcp
GO:0021954	central nervous system neuron development	5	88	0.0322	Hsp90ab1,Ntrk2,Ogdh,Rac1,Rapgef2
GO:0044703	multi-organism reproductive process	21	919	0.0322	Abat,Aldoa,Bsg,Cadm1,Cct3,Cct7,Cd9,Cst3,Ctsb,Dld,Got2,Hspa1b,Park7,Pebp1,Ppp2r1a,Pzp,Sept6,Sept7,Tpt1,Trim28,Vipas39
GO:0051289	protein homotetramerization	5	88	0.0322	Aldh5a1,Aldoa,Pfkl,Pfkp,Pkm
GO:0006414	translational elongation	3	27	0.0326	Eef1a1,Eef1a2,Eef1g
GO:0071353	cellular response to interleukin-4	3	27	0.0326	Coro1a,Fasn,Hsp90ab1
GO:2000300	regulation of synaptic vesicle exocytosis	3	27	0.0326	Atp2a2,Pfn2,Rims1
GO:0051222	positive regulation of protein transport	12	410	0.0329	Abat,Actr3,Cadm1,Cdc42,Dctn1,Dynll1,Fis1,Glud1,Hk1,Hpca,Hsp90ab1,Trim28
GO:0060999	positive regulation of dendritic spine development	4	55	0.0329	Actr3,Cfl1,Itpka,Rac1
GO:1903428	positive regulation of reactive oxygen species biosynthetic process	4	55	0.0329	Ass1,Ddah1,Hsp90ab1,Park7
GO:0034614	cellular response to reactive oxygen species	6	127	0.033	Cfl1,Cst3,Park7,Prdx5,Rhob,Slc8a1
GO:0035304	regulation of protein dephosphorylation	6	127	0.033	Gnai2,Hsp90ab1,Pin1,Ppp2ca,Ppp2r1a,Vcan
GO:0007163	establishment or maintenance of cell polarity	7	170	0.0343	Actr3,Cdc42,Cfl1,Dctn1,Fscn1,Hsp90ab1,Sh3bp1
GO:0070925	organelle assembly	15	576	0.0343	Actr3,Arl3,Cfl2,Cltc,Coro1a,Ctsd,Dctn1,Dync1h1,Dynll1,Dynll2,Kpnb1,Rab7,Rps17,Sept7,Synpo
GO:0060249	anatomical structure homeostasis	9	262	0.0346	Aldoa,Cfl2,Coro1a,Dctn1,Hsp90ab1,Ncdn,Prdx5,Rab7,Rac1
GO:0006072	glycerol-3-phosphate metabolic process	2	8	0.0351	Gpd1,Gpd1l
GO:0050773	regulation of dendrite development	7	171	0.0351	Actr3,Cfl1,Itpka,Ntrk2,Rac1,Rapgef2,Sipa1l1
GO:0055119	relaxation of cardiac muscle	2	8	0.0351	Atp1b1,Atp2a2
GO:0097151	positive regulation of inhibitory postsynaptic potential	2	8	0.0351	Abat,Rims1
GO:1902175	regulation of oxidative stress-induced intrinsic apoptotic signaling pathway	3	28	0.0351	Hsph1,P4hb,Park7
GO:1902416	positive regulation of mRNA binding	2	8	0.0351	Eif3c,Hnrnpl
GO:1990535	neuron projection maintenance	2	8	0.0351	Atp1a3,Dctn1
GO:0006139	nucleobase-containing compound metabolic process	62	3702	0.0352	Acly,Adssl1,Aldoa,Atp1a2,Atp1b1,Atp2b2,Atp5e,Atp5o,Atp6v1b2,Celf4,Cnp,Cs,Ctbp1,Dlat,Dld,Dynll1,Fasn,Gbas,Gm10221,Gpd1,Gpd1l,Hint1,Hk1,Hnrnpl,Hsp90ab1,Hspa8,Idh3g,Kcnab2,Khsrp,Mdh2,Mpi,Ndufb8,Ndufv1,Nudt3,Ogdh,Pabpc1,Park7,Pcmt1,Pdha1,Pfkl,Pfkp,Pgam1,Pkm,Prdx5,Prps1,Ptbp2,Rps17,Sdha,Slc30a9,Smarcc2,Snrnp200,Ssb,Suclg1,Tardbp,Tpi1,Trim28,Ube2v2,Uqcrc1,Uqcrh,Vars,Vcp,Vipas39
GO:0045921	positive regulation of exocytosis	5	91	0.0353	Ap1g1,Cadps,Rab7,Rims1,Sept5
GO:0006081	cellular aldehyde metabolic process	4	57	0.0357	Adh5,Park7,Sh3bp1,Tpi1
GO:0006605	protein targeting	7	173	0.0363	Fis1,Hspa4,Hspa8,Rab7,Syngr1,Ywhag,Ywhaq
GO:0006898	receptor-mediated endocytosis	7	173	0.0363	Ap2a1,Ap2a2,Ap2b1,Ap2m1,Cd9,Cltc,Dnm1
GO:0007006	mitochondrial membrane organization	5	92	0.0364	Afg3l2,Cnp,Dnajc11,Hspa4,Slc25a5
GO:0030516	regulation of axon extension	5	92	0.0364	Actr3,Dpysl2,Gdi1,L1cam,Mag
GO:0007043	cell-cell junction assembly	4	58	0.0374	Cd9,Cntnap1,Fscn1,Nfasc
GO:1901616	organic hydroxy compound catabolic process	4	58	0.0374	Adh5,Nudt3,Sh3bp1,Tpi1
GO:0042737	drug catabolic process	5	93	0.0376	Adh5,Fah,Prdx5,Qdpr,Sh3bp1
GO:1901699	cellular response to nitrogen compound	14	530	0.038	Ass1,Atp1a3,Capn2,Cfl1,Fis1,Gnai2,Gpd1,Ntrk2,Pkm,Rapgef2,Rpl23,Sh3bp1,Slc8a1,Ywhag
GO:0048878	chemical homeostasis	22	1002	0.0386	Afg3l2,Atp1a2,Atp1a3,Atp1b1,Atp1b2,Atp1b3,Atp2a2,Atp2b1,Atp2b2,Dmxl2,Fis1,Gng3,Gpd1l,Hk1,Hpx,Park7,Ppp2ca,Rab7,Scn2b,Slc30a9,Slc8a1,Trf
GO:0009895	negative regulation of catabolic process	9	269	0.0388	Cst3,Hsp90ab1,Pabpc1,Park7,Pin1,Prkcg,Rpl23,Tardbp,Usp14
GO:0030307	positive regulation of cell growth	7	176	0.0389	Cfl1,Cpne6,Gdi1,L1cam,Lgi1,Pin1,Rims1
GO:0051704	multi-organism process	35	1840	0.0389	Abat,Adh5,Aldoa,Ass1,Atp2a2,Bsg,Cadm1,Cct3,Cct7,Cd9,Cfl1,Cnp,Cst3,Ctsb,Dld,Eea1,Eif3f,Got2,Hsp90ab1,Hspa1b,Hspa8,Park7,Pcbp2,Pebp1,Ppp2r1a,Pzp,Rab7,Sept6,Sept7,Ssb,Tardbp,Tpt1,Trim28,Vcp,Vipas39
GO:0060548	negative regulation of cell death	22	1004	0.0392	Ap2b1,Ckmt1,Coro1a,Cst3,Ctsb,Gnai2,Hk1,Hsp90ab1,Hspa1b,Hspa4,Hspa8,Hsph1,Mag,Ntrk2,Park7,Pcmt1,Pin1,Prdx5,Prkcg,Slc25a5,Tpt1,Ube2v2
GO:0021537	telencephalon development	9	270	0.0394	Atp1a3,Cfl1,Dpysl2,Ntrk2,Ogdh,Pebp1,Rac1,Slc1a2,Slc32a1
GO:0006470	protein dephosphorylation	7	177	0.0398	Dnajc6,Pgp,Ppp1cb,Ppp2ca,Ppp2r1a,Ppp3r1,Sh3bp1
GO:0048488	synaptic vesicle endocytosis	3	30	0.0398	Ap2m1,Dnajc6,Dnm1
GO:0006527	arginine catabolic process	2	9	0.0402	Ddah1,Fah
GO:0006558	L-phenylalanine metabolic process	2	9	0.0402	Fah,Qdpr
GO:0009111	vitamin catabolic process	2	9	0.0402	Cbr3,Sh3bp1
GO:0022028	tangential migration from the subventricular zone to the olfactory bulb	2	9	0.0402	Ogdh,Rac1
GO:0032486	Rap protein signal transduction	2	9	0.0402	Rap2b,Rapgef2
GO:0033135	regulation of peptidyl-serine phosphorylation	6	135	0.0402	Cdc42,Gpd1l,Hsp90ab1,Ntrk2,Park7,Pfn2
GO:0043086	negative regulation of catalytic activity	18	765	0.0402	Cand1,Chordc1,Cst3,Dynll1,Gbas,Gnai2,Hpca,Hspa1b,Lxn,Park7,Pebp1,Prdx5,Pzp,Rnh1,Rpl23,Serpinb6a,Uchl1,Usp14
GO:0050770	regulation of axonogenesis	7	178	0.0402	Actr3,Dpysl2,Gdi1,L1cam,Mag,Ntrk2,Sipa1l1
GO:1901607	alpha-amino acid biosynthetic process	4	60	0.0402	Ass1,Glud1,Got2,Oat
GO:1902221	erythrose 4-phosphate/phosphoenolpyruvate family amino acid metabolic process	2	9	0.0402	Fah,Qdpr
GO:0019220	regulation of phosphate metabolic process	32	1650	0.0405	Cdc42,Chordc1,Cops8,Dynll1,Eef1a2,Gnai2,Gpd1,Gpd1l,Hpca,Hpx,Hsp90ab1,Hspa4,Hsph1,L1cam,Mapre3,Necab2,Ntrk2,Park7,Pebp1,Pfn2,Pgam1,Pin1,Ppp2ca,Ppp2r1a,Rac1,Rap2b,Rapgef2,Tardbp,Trf,Uchl1,Vcan,Vcp
GO:0008015	blood circulation	11	376	0.0418	Abat,Adh5,Atp1a2,Atp1a3,Atp1b1,Cdc42,Ddah1,Gpd1l,Ncald,Scn2b,Slc8a1
GO:0031116	positive regulation of microtubule polymerization	3	31	0.0418	Dctn1,Hspa1b,Rac1
GO:0031330	negative regulation of cellular catabolic process	8	226	0.0418	Cst3,Hsp90ab1,Pabpc1,Park7,Prkcg,Rpl23,Tardbp,Usp14
GO:0032435	negative regulation of proteasomal ubiquitin-dependent protein catabolic process	3	31	0.0418	Hsp90ab1,Park7,Usp14
GO:0033119	negative regulation of RNA splicing	3	31	0.0418	Celf4,Hnrnpl,Ptbp2
GO:1903580	positive regulation of ATP metabolic process	3	31	0.0418	Gpd1,Park7,Vcp
GO:1905476	negative regulation of protein localization to membrane	3	31	0.0418	Ap2m1,Cltc,Gdi1
GO:0044092	negative regulation of molecular function	23	1078	0.0425	Atp1a2,Cand1,Chordc1,Ckmt1,Cst3,Dynll1,Gbas,Gnai2,Hpca,Hspa1b,Hspa4,Lxn,Park7,Pebp1,Pin1,Ppp2ca,Prdx5,Pzp,Rnh1,Rpl23,Serpinb6a,Uchl1,Usp14
GO:0021543	pallium development	7	182	0.0437	Atp1a3,Cfl1,Ntrk2,Ogdh,Pebp1,Rac1,Slc32a1
GO:0032414	positive regulation of ion transmembrane transporter activity	5	98	0.0437	Atp1b1,Atp1b2,Atp1b3,Cfl1,Gbas
GO:0055117	regulation of cardiac muscle contraction	4	62	0.0437	Atp1a2,Atp1b1,Atp2a2,Slc8a1
GO:1900371	regulation of purine nucleotide biosynthetic process	4	62	0.0437	Gpd1,Hpca,Pgam1,Vcp
GO:0042325	regulation of phosphorylation	29	1466	0.0441	Cdc42,Chordc1,Cops8,Dynll1,Eef1a2,Gnai2,Gpd1,Gpd1l,Hpx,Hsp90ab1,Hspa4,Hsph1,L1cam,Mapre3,Necab2,Ntrk2,Park7,Pebp1,Pfn2,Pgam1,Pin1,Ppp2ca,Rac1,Rap2b,Rapgef2,Tardbp,Trf,Uchl1,Vcp
GO:0090314	positive regulation of protein targeting to membrane	3	32	0.0445	Actr3,Fis1,Hpca
GO:0097061	dendritic spine organization	3	32	0.0445	Cdc42,Itpka,Sept7
GO:0035556	intracellular signal transduction	26	1274	0.0446	Arl3,Atp1b1,Atp2a2,Camkv,Cdc42,Cops8,Fis1,Gdi1,Gdi2,Gnai2,Hint1,Hpca,Kpnb1,Ncald,Ntrk2,Pebp1,Ppp3r1,Prkcg,Rac1,Rap2b,Rapgef2,Rhob,Slc8a1,Trf,Trim28,Ywhaq
GO:0051223	regulation of protein transport	16	661	0.0454	Abat,Actr3,Cadm1,Cdc42,Dctn1,Dynll1,Fis1,Gdi1,Glud1,Hk1,Hpca,Hsp90ab1,Park7,Pfkl,Ppp2ca,Trim28
GO:0021879	forebrain neuron differentiation	4	63	0.0455	Ogdh,Rac1,Rapgef2,Smarcc2
GO:0034214	protein hexamerization	2	10	0.0455	Oat,Vcp
GO:0045454	cell redox homeostasis	4	63	0.0455	Dld,Glrx5,P4hb,Prdx5
GO:1904851	positive regulation of establishment of protein localization to telomere	2	10	0.0455	Cct3,Cct7
GO:1904064	positive regulation of cation transmembrane transport	6	141	0.0467	Atp1b1,Atp1b2,Atp1b3,Cfl1,Gbas,Park7
GO:0042180	cellular ketone metabolic process	4	64	0.0475	Cbr3,Got2,Gpd1,Park7
GO:0043278	response to morphine	3	33	0.0475	Gnao1,Got2,Prkcg
GO:0046928	regulation of neurotransmitter secretion	4	64	0.0475	Atp2a2,Ntrk2,Pfn2,Rims1
GO:2000378	negative regulation of reactive oxygen species metabolic process	4	64	0.0475	Dynll1,Eef1a1,Khsrp,Park7
GO:2000379	positive regulation of reactive oxygen species metabolic process	5	101	0.0477	Ass1,Ddah1,Gnai2,Hsp90ab1,Park7
GO:0006518	peptide metabolic process	12	440	0.048	Aldh5a1,Eef1a1,Eef1a2,Eef1g,Eif3c,Eif3f,Gstm5,Hspa8,Park7,Rpl23,Rps17,Vars
GO:0003012	muscle system process	8	234	0.0485	Aldoa,Atp1a3,Atp1b1,Atp2a2,Atp8a2,Gpd1l,Scn2b,Slc8a1
GO:0045597	positive regulation of cell differentiation	22	1033	0.0492	Actr3,Ap2a1,Atp8a2,Cdc42,Cfl1,Cpne6,Dpysl3,Eef1a1,Gdi1,Gfap,Hsp90ab1,Itpka,L1cam,Mag,Ntrk2,Pin1,Rac1,Rapgef2,Rims1,Tmsb4x,Trf,Ube2v2
GO:0007005	mitochondrion organization	11	388	0.0493	Afg3l2,Cnp,Dnajc11,Dnm1,Fis1,Hspa4,Ndufb7,Ndufb8,Ndufs8,Park7,Slc25a5
GO:0043666	regulation of phosphoprotein phosphatase activity	5	102	0.0493	Gnai2,Hsp90ab1,Ppp2ca,Ppp2r1a,Vcan
GO:0048814	regulation of dendrite morphogenesis	5	102	0.0493	Actr3,Cfl1,Itpka,Rapgef2,Sipa1l1
GO:1905477	positive regulation of protein localization to membrane	5	102	0.0493	Actr3,Ap2b1,Fis1,Hpca,Necab2

## Sheet: S7
	S7. Table S7 The Cell Component (CC) Associated with the Differentially Expressed Proteins in the AD+SMC/AD Group.
	Se-methylselenocysteine (SMC) Improves Cognitive Deficits by Attenuating Synaptic and Metabolic Abnormalities in Alzheimer's Mice Model: A Proteomic Study Xiubo Du1#, Qingqing Shi1#, Yuxi Zhao1, Yongli Xie1, Xuexia Li1, Qiong Liu1, Javed Iqbal1, Huajie Zhang1,2, Xukun Liu1,3, Liming Shen1* 1Shenzhen Key Laboratory of Marine Biotechnology and Ecology, College of Life Science and Oceanography, Shen…
#term ID	Term description	Observed gene count	Background gene count	False discovery rate	Matching proteins
GO:0043209	myelin sheath	47	212	1.27e-38	Aldoa,Ass1,Atp1a2,Atp1a3,Atp1b1,Atp5o,Atp6v1b2,Cct3,Cdc42,Ckmt1,Cltc,Cnp,Cntnap1,Dlat,Dld,Dnm1,Dpysl2,Eef1a1,Eef1a2,Fscn1,Gdi1,Gdi2,Gfap,Gnao1,Got2,Hspa8,Mag,Mdh2,Mog,Nfasc,Nsf,Pdha1,Pebp1,Pgam1,Pkm,Plp1,Sdha,Sept7,Slc25a3,Slc25a5,Stip1,Syn2,Tagln3,Uchl1,Uqcrc1,Vcp,Ywhag
GO:0005737	cytoplasm	226	9909	3.68e-36	AW549877,Abat,Acaa1a,Acly,Actn1,Actr3,Adh5,Adssl1,Afg3l2,Aldh5a1,Aldoa,Anks1b,Ap1g1,Ap2a1,Ap2a2,Ap2b1,Ap2m1,Ap2s1,Arl3,Arpc1a,Ass1,Atl3,Atp1a2,Atp1a3,Atp1b2,Atp1b3,Atp2a2,Atp2b2,Atp5e,Atp5o,Atp6v1b2,Atp6v1c1,Atp8a2,Blmh,Bsg,Cadm1,Cadm2,Cadps,Camkv,Cand1,Capn2,Capzb,Cbr1,Cbr3,Cct3,Cct7,Cdc42,Celf4,Cfl1,Cfl2,Cisd1,Ckmt1,Cltc,Cnp,Cops8,Coro1a,Cplx1,Cpne6,Cs,Cst3,Ctbp1,Ctsb,Ctsd,Dctn1,Dip2b,Dlat,Dld,…
GO:0044444	cytoplasmic part	197	7673	3.61e-34	AW549877,Abat,Acaa1a,Acly,Actn1,Actr3,Adh5,Afg3l2,Aldh5a1,Aldoa,Anks1b,Ap1g1,Ap2a1,Ap2a2,Ap2b1,Ap2m1,Ap2s1,Arl3,Ass1,Atl3,Atp1a2,Atp1a3,Atp1b3,Atp2a2,Atp2b2,Atp5e,Atp5o,Atp6v1b2,Atp6v1c1,Atp8a2,Bsg,Cadm1,Cadps,Camkv,Cand1,Capn2,Capzb,Cbr3,Cct3,Cct7,Cdc42,Cfl1,Cfl2,Cisd1,Ckmt1,Cltc,Cnp,Cops8,Coro1a,Cplx1,Cpne6,Cs,Cst3,Ctbp1,Ctsb,Ctsd,Dctn1,Dlat,Dld,Dmxl2,Dnaja2,Dnajc11,Dnm1,Dpysl2,Dpysl3,Dstn,Dynl…
GO:0097458	neuron part	95	1732	5.44e-34	Abat,Actn1,Adam22,Anks1b,Ap2a2,Ap2m1,Arl3,Ass1,Atp1a2,Atp1a3,Atp2b1,Atp2b2,Atp8a2,Cadm1,Cadm2,Cadps,Capn2,Capzb,Cfl1,Ckmt1,Cltc,Cntnap1,Coro1a,Cplx1,Cpne6,Cst3,Ctbp1,Dctn1,Dmxl2,Dnajc6,Dnm1,Dpysl2,Dpysl3,Dync1h1,Dynll1,Eea1,Eef1a2,Fscn1,Gad2,Gdi1,Glrx5,Gnai2,Gnao1,Gnaz,Gng3,Got2,Gria3,Hpca,Hsp90ab1,Hspa8,Itpka,Kcnab2,Khsrp,L1cam,Lgi3,Mag,Ncdn,Necab2,Nfasc,Nsf,Ntm,Ntrk2,Pabpc1,Park7,Pcmt1,Pebp1,Pf…
GO:0005623	cell	257	14044	8.22e-32	AW549877,Abat,Acaa1a,Acly,Actn1,Actr3,Adam22,Adh5,Adssl1,Afg3l2,Aldh5a1,Aldoa,Anks1b,Ap1g1,Ap2a1,Ap2a2,Ap2b1,Ap2m1,Ap2s1,Arl3,Arpc1a,Ass1,Atl3,Atp1a2,Atp1a3,Atp1b1,Atp1b2,Atp1b3,Atp2a2,Atp2b1,Atp2b2,Atp5e,Atp5o,Atp6v1b2,Atp6v1c1,Atp8a2,Blmh,Bsg,Cadm1,Cadm2,Cadm4,Cadps,Camkv,Cand1,Capn2,Capzb,Cbr1,Cbr3,Cct3,Cct7,Cd9,Cdc42,Celf4,Cfl1,Cfl2,Cisd1,Ckmt1,Cltc,Cnp,Cntnap1,Cops8,Coro1a,Cplx1,Cpne6,Cs,Csr…
GO:0044464	cell part	256	14017	4.28e-31	AW549877,Abat,Acaa1a,Acly,Actn1,Actr3,Adam22,Adh5,Adssl1,Afg3l2,Aldh5a1,Aldoa,Anks1b,Ap1g1,Ap2a1,Ap2a2,Ap2b1,Ap2m1,Ap2s1,Arl3,Arpc1a,Ass1,Atl3,Atp1a2,Atp1a3,Atp1b1,Atp1b2,Atp1b3,Atp2a2,Atp2b1,Atp2b2,Atp5e,Atp5o,Atp6v1b2,Atp6v1c1,Atp8a2,Blmh,Bsg,Cadm1,Cadm2,Cadm4,Cadps,Camkv,Cand1,Capn2,Capzb,Cbr1,Cbr3,Cct3,Cct7,Cd9,Cdc42,Celf4,Cfl1,Cfl2,Cisd1,Ckmt1,Cltc,Cnp,Cntnap1,Cops8,Coro1a,Cplx1,Cpne6,Cs,Csr…
GO:0043005	neuron projection	81	1429	2.51e-29	Abat,Actn1,Adam22,Anks1b,Ap2m1,Arl3,Ass1,Atp1a2,Atp1a3,Atp2b1,Atp2b2,Atp8a2,Cadm1,Cadm2,Capn2,Capzb,Cfl1,Cltc,Cntnap1,Coro1a,Cplx1,Cpne6,Cst3,Dctn1,Dnm1,Dpysl2,Dpysl3,Dync1h1,Dynll1,Eea1,Fscn1,Gad2,Gdi1,Glrx5,Gnai2,Gnao1,Gnaz,Gng3,Gria3,Hpca,Hsp90ab1,Hspa8,Itpka,Kcnab2,Khsrp,L1cam,Lgi3,Mag,Ncdn,Necab2,Nfasc,Nsf,Ntm,Ntrk2,Pabpc1,Park7,Pcmt1,Pebp1,Pfn2,Pin1,Ppp2ca,Ppp2r1a,Prkcg,Ptbp2,Qdpr,Rab7,Rac1…
GO:0005622	intracellular	241	12462	3.57e-29	AW549877,Abat,Acaa1a,Acly,Actn1,Actr3,Adh5,Adssl1,Afg3l2,Aldh5a1,Aldoa,Anks1b,Ap1g1,Ap2a1,Ap2a2,Ap2b1,Ap2m1,Ap2s1,Arl3,Arpc1a,Ass1,Atl3,Atp1a2,Atp1a3,Atp1b1,Atp1b2,Atp1b3,Atp2a2,Atp2b1,Atp2b2,Atp5e,Atp5o,Atp6v1b2,Atp6v1c1,Atp8a2,Blmh,Bsg,Cadm1,Cadm2,Cadps,Camkv,Cand1,Capn2,Capzb,Cbr1,Cbr3,Cct3,Cct7,Cdc42,Celf4,Cfl1,Cfl2,Cisd1,Ckmt1,Cltc,Cnp,Cops8,Coro1a,Cplx1,Cpne6,Cs,Csrp1,Cst3,Ctbp1,Ctsb,Ctsd,D…
GO:0044424	intracellular part	237	12219	7.23e-28	AW549877,Abat,Acaa1a,Acly,Actn1,Actr3,Adh5,Adssl1,Afg3l2,Aldh5a1,Aldoa,Anks1b,Ap1g1,Ap2a1,Ap2a2,Ap2b1,Ap2m1,Ap2s1,Arl3,Arpc1a,Ass1,Atl3,Atp1a2,Atp1a3,Atp1b2,Atp1b3,Atp2a2,Atp2b1,Atp2b2,Atp5e,Atp5o,Atp6v1b2,Atp6v1c1,Atp8a2,Blmh,Bsg,Cadm1,Cadm2,Cadps,Camkv,Cand1,Capn2,Capzb,Cbr1,Cbr3,Cct3,Cct7,Cdc42,Celf4,Cfl1,Cfl2,Cisd1,Ckmt1,Cltc,Cnp,Cops8,Coro1a,Cplx1,Cpne6,Cs,Csrp1,Cst3,Ctbp1,Ctsb,Ctsd,Dctn1,Di…
GO:0120025	plasma membrane bounded cell projection	96	2172	1.33e-27	Abat,Actn1,Actr3,Adam22,Aldoa,Anks1b,Ap2a1,Ap2m1,Arl3,Arpc1a,Ass1,Atp1a2,Atp1a3,Atp2b1,Atp2b2,Atp6v1b2,Atp8a2,Cadm1,Cadm2,Capn2,Capzb,Cbr1,Cdc42,Cfl1,Cltc,Cnp,Cntnap1,Coro1a,Cplx1,Cpne6,Cst3,Dctn1,Dld,Dnm1,Dpysl2,Dpysl3,Dync1h1,Dynll1,Eea1,Eef1a1,Fscn1,Gad2,Gdi1,Gfap,Glrx5,Gnai2,Gnao1,Gnaz,Gng3,Gria3,Gstm5,Hk1,Hpca,Hsp90ab1,Hspa8,Itpka,Kcnab2,Khsrp,L1cam,Lgi3,Mag,Ncdn,Necab2,Nfasc,Nsf,Ntm,Ntrk2,P…
GO:0120038	plasma membrane bounded cell projection part	75	1532	2.87e-23	Actn1,Actr3,Aldoa,Anks1b,Ap2a1,Ap2m1,Arl3,Arpc1a,Atp1a2,Atp1a3,Atp2b1,Atp2b2,Atp8a2,Cadm1,Capn2,Capzb,Cdc42,Cfl1,Cltc,Cntnap1,Coro1a,Cplx1,Cpne6,Dctn1,Dnm1,Dpysl2,Dpysl3,Dynll1,Eea1,Eef1a1,Fscn1,Glrx5,Gnai2,Gnao1,Gnaz,Gng3,Gria3,Gstm5,Hk1,Hpca,Hsp90ab1,Hspa8,Itpka,Kcnab2,Khsrp,L1cam,Mag,Ncdn,Necab2,Nfasc,Nsf,Ntrk2,Pabpc1,Pcmt1,Pebp1,Pfn2,Ppp2ca,Ppp2r1a,Prkcg,Ptbp2,Rab7,Rac1,Sept5,Sept6,Sept7,Sh3b…
GO:0045202	synapse	59	968	2.89e-22	Actn1,Actr3,Anks1b,Ap2a2,Ap2m1,Atp1a2,Atp1a3,Atp2a2,Atp2b1,Atp2b2,Cadm1,Cadm2,Cadps,Capzb,Cfl1,Cltc,Cplx1,Ctbp1,Dmxl2,Dnajc6,Dnm1,Dpysl2,Gad2,Gng3,Gria3,Hpca,Hspa8,Itpka,Kcnab2,L1cam,Lgi1,Lgi3,Nsf,Ntm,Ntrk2,Park7,Pebp1,Pfn2,Ppp2ca,Prkcg,Rab7,Rac1,Rapgef2,Rims1,Sept3,Sept5,Sept6,Sept7,Sipa1l1,Slc1a2,Slc32a1,Slc6a17,Slc8a1,Syn2,Syn3,Syngr1,Synpo,Usp14,Wdr7
GO:0044456	synapse part	52	809	2.11e-20	Actn1,Anks1b,Ap2a2,Ap2m1,Atp1a2,Atp1a3,Atp2b1,Atp2b2,Cadm1,Cadps,Capzb,Cfl1,Cltc,Cplx1,Ctbp1,Dmxl2,Dnajc6,Dnm1,Dpysl2,Gad2,Gng3,Gria3,Hpca,Hspa8,Itpka,Kcnab2,L1cam,Lgi3,Nsf,Ntrk2,Park7,Pebp1,Pfn2,Ppp2ca,Prkcg,Rab7,Rac1,Rims1,Sept3,Sept5,Sept6,Sept7,Sipa1l1,Slc1a2,Slc32a1,Slc6a17,Slc8a1,Syn2,Syn3,Syngr1,Synpo,Wdr7
GO:0036477	somatodendritic compartment	55	990	6.59e-19	Actn1,Anks1b,Ass1,Atp1a2,Atp1a3,Atp2b1,Atp2b2,Cadm1,Cadm2,Capn2,Capzb,Cfl1,Ckmt1,Cplx1,Cpne6,Cst3,Dctn1,Dpysl2,Dync1h1,Eef1a2,Fscn1,Gdi1,Glrx5,Gnai2,Gnao1,Gnaz,Gng3,Got2,Gria3,Hpca,Hsp90ab1,Hspa8,Itpka,Khsrp,L1cam,Ncdn,Necab2,Nfasc,Nsf,Ntrk2,Pabpc1,Pcmt1,Pebp1,Ppp2r1a,Prkcg,Ptbp2,Rac1,Rapgef2,Sipa1l1,Slc1a2,Slc32a1,Slc8a1,Synpo,Tubb3,Uchl1
GO:0030424	axon	47	712	8.57e-19	Adam22,Ap2m1,Atp1a3,Cadm1,Cadm2,Cfl1,Cltc,Cntnap1,Coro1a,Cplx1,Cpne6,Cst3,Dnm1,Dpysl2,Dpysl3,Dync1h1,Dynll1,Eea1,Fscn1,Gad2,Gdi1,Gria3,Hpca,Hsp90ab1,Hspa8,Kcnab2,L1cam,Mag,Necab2,Nfasc,Ntm,Ntrk2,Park7,Pebp1,Pfn2,Ppp2ca,Ptbp2,Rab7,Sept5,Sept6,Sept7,Slc1a2,Slc32a1,Syn2,Syngr1,Tubb3,Uchl1
GO:0032991	protein-containing complex	122	4701	1.73e-16	Abat,Acly,Actr3,Afg3l2,Aldoa,Ap1g1,Ap2a1,Ap2a2,Ap2b1,Ap2m1,Ap2s1,Arpc1a,Atp1a2,Atp1a3,Atp1b1,Atp1b2,Atp1b3,Atp2a2,Atp5e,Atp5o,Atp6v1b2,Atp6v1c1,C1qb,Cand1,Capzb,Cct3,Cct7,Cltc,Cops8,Coro1a,Cplx1,Ctbp1,Dctn1,Dlat,Dld,Dmxl2,Dnajc11,Dnm1,Dpysl2,Dpysl3,Dync1h1,Dynll1,Dynll2,Eea1,Eef1a2,Eif3c,Eif3f,Etfa,Fis1,Fscn1,Gdi1,Gm10221,Gnai2,Gnao1,Gnaz,Gng3,Got2,Gpd1,Gpd1l,Gria3,Hdlbp,Hint1,Hk1,Hnrnpl,Hsp90ab1…
GO:0005829	cytosol	99	3326	2.27e-16	AW549877,Acly,Aldoa,Anks1b,Ap1g1,Ass1,Atp6v1b2,Cand1,Capn2,Cbr3,Cct3,Cct7,Cdc42,Cfl1,Cltc,Cnp,Cops8,Coro1a,Cplx1,Ctbp1,Dctn1,Dnaja2,Dpysl2,Dpysl3,Dynll1,Eea1,Eef1a1,Efr3b,Elmo2,Fasn,Fscn1,Gad2,Gnai2,Gnaz,Gpd1,Gstm5,Hdlbp,Hint1,Hk1,Hnrnpl,Hpca,Hsp90ab1,Hspa4,Hspa4l,Hspa8,Hsph1,Kcnab2,Khsrp,Kpnb1,Ncald,Ncdn,Ndufv1,Nsf,Ntrk2,Nudt3,Pabpc1,Park7,Pcbp2,Pcmt1,Pfkl,Pfkp,Pfn2,Pgam1,Pgp,Pin1,Pkm,Ppp1cb,Ppp…
GO:0043226	organelle	203	10897	4.38e-16	AW549877,Abat,Acaa1a,Acly,Actn1,Actr3,Adh5,Afg3l2,Aldh5a1,Aldoa,Anks1b,Ap1g1,Ap2a1,Ap2a2,Ap2b1,Ap2m1,Ap2s1,Arl3,Arpc1a,Ass1,Atl3,Atp1a2,Atp1a3,Atp1b3,Atp2a2,Atp2b1,Atp2b2,Atp5e,Atp5o,Atp6v1b2,Atp6v1c1,Atp8a2,Bsg,Cadm1,Cadps,Camkv,Cand1,Capn2,Capzb,Cbr1,Cbr3,Cct3,Cct7,Cd9,Cdc42,Celf4,Cfl1,Cfl2,Cisd1,Ckmt1,Cltc,Cnp,Cops8,Coro1a,Cpne6,Cs,Csrp1,Cst3,Ctbp1,Ctsb,Ctsd,Dctn1,Dip2b,Dlat,Dld,Dmxl2,Dnaja2,D…
GO:0044297	cell body	45	776	5.35e-16	Ass1,Atp1a3,Atp2b1,Atp2b2,Cadm2,Capzb,Cct3,Cct7,Cfl1,Ckmt1,Cplx1,Cpne6,Cst3,Dctn1,Dpysl2,Dpysl3,Dync1h1,Eef1a2,Gdi1,Gfap,Glrx5,Gnai2,Gnao1,Gnaz,Gng3,Got2,Gria3,Hpca,Hsp90ab1,Hspa1b,Hspa8,Khsrp,L1cam,Ncdn,Ntrk2,Park7,Pcmt1,Pebp1,Ptbp2,Rapgef2,Sept7,Sipa1l1,Synpo,Tubb3,Uchl1
GO:0098793	presynapse	34	429	1.16e-15	Ap2a2,Ap2m1,Cadm1,Cadps,Cltc,Cplx1,Ctbp1,Dmxl2,Dnm1,Dpysl2,Gad2,Gria3,Hspa8,Kcnab2,L1cam,Lgi3,Ntrk2,Park7,Pebp1,Pfn2,Ppp2ca,Rab7,Rims1,Sept3,Sept5,Sept6,Sept7,Slc1a2,Slc32a1,Slc6a17,Syn2,Syn3,Syngr1,Wdr7
GO:0030425	dendrite	41	694	8.51e-15	Actn1,Anks1b,Atp1a2,Atp1a3,Atp2b1,Atp2b2,Cadm1,Capn2,Capzb,Cfl1,Cplx1,Cpne6,Dpysl2,Fscn1,Glrx5,Gnai2,Gnao1,Gnaz,Gng3,Gria3,Hpca,Hsp90ab1,Hspa8,Itpka,Khsrp,L1cam,Ncdn,Necab2,Nfasc,Nsf,Ntrk2,Pabpc1,Ppp2r1a,Prkcg,Rac1,Sipa1l1,Slc1a2,Slc32a1,Slc8a1,Synpo,Tubb3
GO:0043229	intracellular organelle	196	10645	2.86e-14	AW549877,Abat,Acaa1a,Acly,Actn1,Actr3,Adh5,Afg3l2,Aldh5a1,Aldoa,Anks1b,Ap1g1,Ap2a1,Ap2a2,Ap2b1,Ap2m1,Ap2s1,Arl3,Arpc1a,Ass1,Atl3,Atp1a2,Atp1a3,Atp1b3,Atp2a2,Atp2b1,Atp2b2,Atp5e,Atp5o,Atp6v1b2,Atp6v1c1,Atp8a2,Bsg,Cadm1,Cadps,Camkv,Cand1,Capn2,Capzb,Cbr1,Cbr3,Cct3,Cct7,Cdc42,Celf4,Cfl1,Cfl2,Cisd1,Ckmt1,Cltc,Cnp,Cops8,Coro1a,Cpne6,Cs,Csrp1,Cst3,Ctbp1,Ctsb,Ctsd,Dctn1,Dip2b,Dlat,Dld,Dmxl2,Dnaja2,Dnajc…
GO:0031982	vesicle	66	1837	7.57e-14	Actn1,Aldoa,Ap1g1,Ap2a1,Ap2a2,Ap2b1,Ap2m1,Ap2s1,Atp1a2,Atp1b3,Atp2a2,Atp6v1b2,Atp6v1c1,Atp8a2,Bsg,Cadm1,Cadps,Camkv,Cd9,Cdc42,Cltc,Cnp,Coro1a,Cpne6,Cst3,Ctsb,Ctsd,Dld,Dmxl2,Dnajc6,Dnm1,Dynll1,Eea1,Fasn,Gad2,Hsp90ab1,Hspa4,Hspa8,L1cam,Lgi3,Ntrk2,Ociad1,P4hb,Pebp1,Prdx5,Rab7,Rac1,Rap2b,Rapgef2,Rhob,Rims1,Sept5,Sept6,Slc30a9,Slc32a1,Slc6a17,Syn2,Syn3,Syngr1,Tpt1,Trf,Uba1,Usp14,Vipas39,Wdr7,Ywhag
GO:0033267	axon part	33	472	8.5e-14	Ap2m1,Cadm1,Cfl1,Cltc,Cntnap1,Cplx1,Dnm1,Dpysl2,Dpysl3,Dynll1,Eea1,Fscn1,Gria3,Hsp90ab1,Hspa8,Kcnab2,L1cam,Mag,Nfasc,Ntrk2,Pebp1,Pfn2,Ppp2ca,Ptbp2,Rab7,Sept5,Sept6,Sept7,Slc1a2,Slc32a1,Syn2,Syngr1,Uchl1
GO:1902494	catalytic complex	53	1266	2.05e-13	Abat,Afg3l2,Atp1a2,Atp1a3,Atp1b1,Atp1b2,Atp1b3,Atp2a2,Cand1,Dctn1,Dlat,Dld,Dync1h1,Dynll1,Dynll2,Eea1,Etfa,Gnai2,Gnao1,Gnaz,Gng3,Gpd1,Gpd1l,Hint1,Hspa8,Ndufb7,Ndufb8,Ndufs8,Ndufv1,Ogdh,P4hb,Pabpc1,Park7,Pdha1,Pfkl,Pfkp,Pkm,Ppp1cb,Ppp2ca,Ppp2r1a,Ppp3r1,Prps1,Psma5,Psmd4,Sdha,Smarcc2,Snrnp200,Suclg1,Ube2v2,Uqcrc1,Uqcrh,Usp14,Vcp
GO:0044429	mitochondrial part	42	854	1.14e-12	Abat,Afg3l2,Ass1,Atp5e,Atp5o,Cfl1,Cisd1,Ckmt1,Cnp,Cs,Dlat,Dld,Dnajc11,Dnm1,Echs1,Etfa,Fis1,Gbas,Glrx5,Glud1,Gm10221,Got2,Hk1,Hspa1b,Mdh2,Ndufb7,Ndufb8,Ndufs8,Ndufv1,Oat,Ogdh,Park7,Pcca,Pdha1,Pebp1,Sdha,Slc25a3,Slc25a5,Suclg1,Uqcrc1,Uqcrh,Vat1
GO:0016020	membrane	152	7460	1.63e-12	Acly,Actn1,Actr3,Adam22,Adssl1,Afg3l2,Aldoa,Anks1b,Ap1g1,Ap2a1,Ap2a2,Ap2b1,Ap2m1,Ap2s1,Arl3,Arpc1a,Ass1,Atl3,Atp1a2,Atp1a3,Atp1b1,Atp1b2,Atp1b3,Atp2a2,Atp2b1,Atp2b2,Atp5e,Atp5o,Atp6v1b2,Atp6v1c1,Atp8a2,Bsg,Cadm1,Cadm2,Cadm4,Cadps,Camkv,Capn2,Capzb,Cbr1,Cct3,Cd9,Cdc42,Cfl1,Cisd1,Ckmt1,Cltc,Cnp,Cntnap1,Coro1a,Cplx1,Cpne6,Cst3,Ctsb,Ctsd,Dctn1,Dmxl2,Dnaja2,Dnajc11,Dnm1,Dpysl2,Dynll1,Eea1,Eef1a1,Efr3b…
GO:0005739	mitochondrion	52	1312	2.77e-12	Abat,Adh5,Afg3l2,Aldh5a1,Aldoa,Ass1,Atp5e,Atp5o,Bsg,Cfl1,Cisd1,Ckmt1,Cnp,Cs,Dlat,Dld,Dnajc11,Dnm1,Dynll1,Echs1,Etfa,Fis1,Gbas,Glrx5,Glud1,Gm10221,Got2,Hk1,Hspa1b,Idh3g,Kbp,Mdh2,Ndufb7,Ndufb8,Ndufs8,Ndufv1,Oat,Ogdh,Park7,Pcca,Pdha1,Pebp1,Pin1,Sdha,Slc25a3,Slc25a5,Slc8a1,Suclg1,Uba1,Uqcrc1,Uqcrh,Vat1
GO:0043227	membrane-bounded organelle	180	9775	5.51e-12	AW549877,Abat,Acaa1a,Acly,Actn1,Actr3,Adh5,Afg3l2,Aldh5a1,Aldoa,Anks1b,Ap1g1,Ap2a1,Ap2a2,Ap2b1,Ap2m1,Ap2s1,Arl3,Ass1,Atl3,Atp1a2,Atp1a3,Atp1b3,Atp2a2,Atp2b1,Atp2b2,Atp5e,Atp5o,Atp6v1b2,Atp6v1c1,Atp8a2,Bsg,Cadm1,Cadps,Camkv,Cand1,Capn2,Cbr1,Cbr3,Cd9,Cdc42,Celf4,Cfl1,Cfl2,Cisd1,Ckmt1,Cltc,Cnp,Cops8,Coro1a,Cpne6,Cs,Csrp1,Cst3,Ctbp1,Ctsb,Ctsd,Dctn1,Dip2b,Dlat,Dld,Dmxl2,Dnaja2,Dnajc11,Dnajc6,Dnm1,Dync…
GO:0098805	whole membrane	51	1300	6.81e-12	Actn1,Ap1g1,Ap2a2,Ap2b1,Ap2m1,Ap2s1,Ass1,Atp1a2,Atp1b1,Atp1b3,Atp2b1,Atp2b2,Atp6v1c1,Bsg,Capn2,Cisd1,Cltc,Cnp,Coro1a,Ctsd,Dmxl2,Dnajc11,Eea1,Fis1,Gad2,Gbas,Gfap,Gnai2,Gpm6b,Hk1,Hsp90ab1,Hspa8,L1cam,Mag,Mog,Ntrk2,Park7,Pebp1,Rab7,Rac1,Rap2b,Rhob,Slc25a5,Slc32a1,Slc6a17,Syn2,Syn3,Syngr1,Trf,Uba1,Vat1
GO:0031410	cytoplasmic vesicle	59	1710	1.3e-11	Actn1,Ap1g1,Ap2a1,Ap2a2,Ap2b1,Ap2m1,Ap2s1,Atp1a2,Atp1b3,Atp6v1b2,Atp6v1c1,Atp8a2,Bsg,Cadm1,Cadps,Camkv,Cdc42,Cltc,Cnp,Coro1a,Cpne6,Cst3,Ctsb,Ctsd,Dld,Dmxl2,Dnm1,Dynll1,Eea1,Fasn,Gad2,Hsp90ab1,Hspa8,L1cam,Lgi3,Ntrk2,Ociad1,P4hb,Pebp1,Prdx5,Rab7,Rac1,Rap2b,Rapgef2,Rhob,Sept5,Sept6,Slc30a9,Slc32a1,Slc6a17,Syn2,Syn3,Syngr1,Tpt1,Trf,Uba1,Usp14,Vipas39,Wdr7
GO:0071944	cell periphery	106	4443	1.62e-11	Acly,Actn1,Adam22,Anks1b,Ap2a1,Ap2a2,Ap2b1,Ap2m1,Ap2s1,Arpc1a,Atp1a2,Atp1a3,Atp1b1,Atp1b2,Atp1b3,Atp2a2,Atp2b1,Atp2b2,Atp5o,Atp6v1b2,Atp6v1c1,Atp8a2,Bsg,Cadm1,Cadm2,Cadm4,Camkv,Capn2,Capzb,Cbr1,Cct3,Cd9,Cdc42,Cfl1,Cltc,Cnp,Cntnap1,Coro1a,Cpne6,Ctsb,Dctn1,Dnm1,Dpysl2,Dstn,Eea1,Eef1a1,Efr3b,Fasn,Fscn1,Gad2,Glg1,Gnai2,Gnao1,Gnaz,Gng3,Got2,Gpd1l,Gpm6b,Gria3,Hint1,Hk1,Hpca,Hsp90ab1,Hspa8,Icam5,Kcnab2,…
GO:1990204	oxidoreductase complex	16	103	2.14e-11	Dlat,Dld,Etfa,Gpd1,Gpd1l,Ndufb7,Ndufb8,Ndufs8,Ndufv1,Ogdh,P4hb,Park7,Pdha1,Sdha,Uqcrc1,Uqcrh
GO:0098796	membrane protein complex	43	1009	4.24e-11	Afg3l2,Ap1g1,Ap2a1,Ap2a2,Ap2b1,Ap2m1,Ap2s1,Atp1a2,Atp1a3,Atp1b1,Atp1b2,Atp1b3,Atp2a2,Atp5e,Atp5o,Atp6v1b2,Atp6v1c1,Cltc,Cplx1,Dctn1,Dnajc11,Dnm1,Gm10221,Gnai2,Gnao1,Gnaz,Gng3,Gria3,Kcnab2,Ndufb7,Ndufb8,Ndufs8,Ndufv1,Park7,Rab7,Scn2b,Sdha,Syn2,Trf,Uqcrc1,Uqcrh,Vcp,Vipas39
GO:0044306	neuron projection terminus	20	206	8.68e-11	Ap2m1,Cltc,Cplx1,Dpysl2,Gria3,Hspa8,Kcnab2,L1cam,Ntrk2,Pebp1,Pfn2,Ppp2ca,Rab7,Sept5,Sept6,Sept7,Slc32a1,Syn2,Syngr1,Uchl1
GO:0005886	plasma membrane	102	4328	1.12e-10	Acly,Actn1,Adam22,Anks1b,Ap2a1,Ap2a2,Ap2b1,Ap2m1,Ap2s1,Arpc1a,Atp1a2,Atp1a3,Atp1b1,Atp1b2,Atp1b3,Atp2a2,Atp2b1,Atp2b2,Atp5o,Atp6v1b2,Atp6v1c1,Atp8a2,Bsg,Cadm1,Cadm2,Cadm4,Camkv,Capn2,Cbr1,Cct3,Cd9,Cdc42,Cfl1,Cltc,Cnp,Cntnap1,Coro1a,Cpne6,Ctsb,Dnm1,Dpysl2,Eea1,Eef1a1,Efr3b,Fasn,Fscn1,Gad2,Glg1,Gnai2,Gnao1,Gnaz,Gng3,Got2,Gpd1l,Gpm6b,Gria3,Hint1,Hk1,Hpca,Hsp90ab1,Hspa8,Icam5,Kcnab2,L1cam,Mag,Necab2,…
GO:0044446	intracellular organelle part	146	7416	1.34e-10	AW549877,Abat,Acaa1a,Acly,Actn1,Actr3,Afg3l2,Aldoa,Ap1g1,Ap2a2,Ap2b1,Ap2m1,Ap2s1,Arl3,Arpc1a,Ass1,Atl3,Atp2a2,Atp5e,Atp5o,Atp6v1c1,Atp8a2,Bsg,Cadps,Camkv,Cand1,Capn2,Capzb,Cbr3,Cct3,Cct7,Cdc42,Cfl1,Cfl2,Cisd1,Ckmt1,Cltc,Cnp,Cops8,Coro1a,Cs,Csrp1,Cst3,Ctbp1,Ctsb,Dctn1,Dlat,Dld,Dmxl2,Dnajc11,Dnm1,Dpysl3,Dstn,Dync1h1,Dynll1,Dynll2,Echs1,Eea1,Eef1a1,Etfa,Fis1,Fscn1,Gad2,Gbas,Gfap,Glg1,Glrx5,Glud1,Gm1…
GO:0043679	axon terminus	19	188	1.46e-10	Ap2m1,Cltc,Cplx1,Dpysl2,Gria3,Hspa8,Kcnab2,L1cam,Ntrk2,Pebp1,Pfn2,Ppp2ca,Rab7,Sept5,Sept6,Sept7,Slc32a1,Syn2,Syngr1
GO:0043025	neuronal cell body	34	688	2.19e-10	Ass1,Atp1a3,Atp2b1,Atp2b2,Cadm2,Capzb,Cfl1,Ckmt1,Cplx1,Cpne6,Cst3,Dctn1,Dpysl2,Dync1h1,Eef1a2,Gdi1,Glrx5,Got2,Gria3,Hpca,Hsp90ab1,Hspa8,Khsrp,L1cam,Ncdn,Ntrk2,Pcmt1,Pebp1,Ptbp2,Rapgef2,Sipa1l1,Synpo,Tubb3,Uchl1
GO:0044422	organelle part	148	7665	3.67e-10	AW549877,Abat,Acaa1a,Acly,Actn1,Actr3,Afg3l2,Aldoa,Ap1g1,Ap2a2,Ap2b1,Ap2m1,Ap2s1,Arl3,Arpc1a,Ass1,Atl3,Atp2a2,Atp2b2,Atp5e,Atp5o,Atp6v1c1,Atp8a2,Bsg,Cadps,Camkv,Cand1,Capn2,Capzb,Cbr3,Cct3,Cct7,Cdc42,Cfl1,Cfl2,Cisd1,Ckmt1,Cltc,Cnp,Cops8,Coro1a,Cs,Csrp1,Cst3,Ctbp1,Ctsb,Dctn1,Dlat,Dld,Dmxl2,Dnajc11,Dnm1,Dpysl3,Dstn,Dync1h1,Dynll1,Dynll2,Echs1,Eea1,Eef1a1,Etfa,Fis1,Fscn1,Gad2,Gbas,Gfap,Glg1,Glrx5,Gl…
GO:0044309	neuron spine	18	194	1.77e-09	Actn1,Anks1b,Atp1a2,Atp1a3,Atp2b1,Capzb,Cfl1,Eea1,Gria3,Hpca,Hspa8,Itpka,Ntrk2,Rac1,Sipa1l1,Slc1a2,Slc8a1,Synpo
GO:0098794	postsynapse	28	514	1.8e-09	Actn1,Anks1b,Atp1a2,Atp1a3,Atp2b1,Atp2b2,Cadm1,Capzb,Cfl1,Dnajc6,Gng3,Gria3,Hpca,Hspa8,Itpka,Kcnab2,Nsf,Ntrk2,Ppp2ca,Prkcg,Rac1,Rims1,Sipa1l1,Slc1a2,Slc8a1,Syn2,Syn3,Synpo
GO:0042470	melanosome	14	103	2.18e-09	Atp1b3,Atp6v1b2,Bsg,Cltc,Cnp,Ctsb,Ctsd,Fasn,Hsp90ab1,Hspa8,P4hb,Rab7,Rac1,Syngr1
GO:0150034	distal axon	24	378	2.18e-09	Ap2m1,Cfl1,Cltc,Cplx1,Dpysl2,Dpysl3,Fscn1,Gria3,Hsp90ab1,Hspa8,Kcnab2,L1cam,Ntrk2,Pebp1,Pfn2,Ppp2ca,Ptbp2,Rab7,Sept5,Sept6,Sept7,Slc32a1,Syn2,Syngr1
GO:0044459	plasma membrane part	65	2362	6.84e-09	Anks1b,Ap2a1,Ap2a2,Ap2b1,Ap2m1,Ap2s1,Arpc1a,Atp1a2,Atp1a3,Atp1b1,Atp1b2,Atp1b3,Atp2a2,Atp2b1,Atp2b2,Bsg,Cadm1,Cadm2,Cadm4,Cd9,Cdc42,Cfl1,Cltc,Coro1a,Ctsb,Eea1,Eef1a1,Fscn1,Gad2,Gnai2,Gnao1,Gnaz,Gng3,Got2,Gria3,Hk1,Hpca,Hsp90ab1,Icam5,Kcnab2,L1cam,Mag,Ntrk2,P4hb,Pcmt1,Ppp2r1a,Prkcg,Rac1,Rapgef2,Rhob,Rims1,Scn2b,Sept3,Sept5,Sept6,Sept7,Sh3bp1,Sipa1l1,Sirpa,Slc1a2,Slc32a1,Slc6a17,Slc8a1,Synpo,Trf
GO:0043195	terminal bouton	14	116	8.3e-09	Ap2m1,Cltc,Cplx1,Dpysl2,Gria3,Hspa8,L1cam,Ntrk2,Pfn2,Ppp2ca,Rab7,Sept5,Syn2,Syngr1
GO:0043197	dendritic spine	17	193	1.06e-08	Actn1,Anks1b,Atp1a2,Atp1a3,Atp2b1,Capzb,Cfl1,Gria3,Hpca,Hspa8,Itpka,Ntrk2,Rac1,Sipa1l1,Slc1a2,Slc8a1,Synpo
GO:0031966	mitochondrial membrane	27	539	1.94e-08	Afg3l2,Ass1,Atp5e,Atp5o,Cfl1,Cisd1,Ckmt1,Cnp,Dnajc11,Dnm1,Fis1,Gbas,Gm10221,Hk1,Ndufb7,Ndufb8,Ndufs8,Ndufv1,Ogdh,Park7,Pebp1,Sdha,Slc25a3,Slc25a5,Uqcrc1,Uqcrh,Vat1
GO:0008021	synaptic vesicle	16	183	3.57e-08	Ap2a2,Cadm1,Dmxl2,Dnm1,Gad2,Hspa8,Lgi3,Pebp1,Sept5,Sept6,Slc32a1,Slc6a17,Syn2,Syn3,Syngr1,Wdr7
GO:0030054	cell junction	38	1037	3.81e-08	Actn1,Actr3,Anks1b,Atp1a2,Atp1b1,Atp2b1,Atp2b2,Cadm1,Cadm2,Cadm4,Cadps,Capzb,Cdc42,Cfl1,Cntnap1,Coro1a,Dmxl2,Fscn1,Gad2,Gria3,Kcnab2,Lgi1,Lgi3,Nfasc,Prkcg,Rap2b,Rapgef2,Rims1,Sept3,Sh3bp1,Sipa1l1,Slc6a17,Slc8a1,Syn2,Syn3,Syngr1,Synpo,Uba1
GO:0098590	plasma membrane region	39	1115	7.86e-08	Anks1b,Ap2a1,Arpc1a,Atp1a2,Atp1b1,Atp1b2,Atp1b3,Atp2b1,Atp2b2,Cadm1,Cd9,Cdc42,Cfl1,Ctsb,Eef1a1,Fscn1,Gad2,Gria3,Hk1,Hpca,Hsp90ab1,L1cam,Ntrk2,Pcmt1,Prkcg,Rac1,Rapgef2,Rhob,Rims1,Sept3,Sept5,Sept6,Sept7,Sh3bp1,Sipa1l1,Slc1a2,Slc8a1,Synpo,Trf
GO:0099503	secretory vesicle	25	525	1.88e-07	Actn1,Ap2a1,Ap2a2,Ap2m1,Bsg,Cadm1,Cadps,Cdc42,Dld,Dmxl2,Dnm1,Dynll1,Gad2,Hspa8,Lgi3,Pebp1,Rab7,Sept5,Sept6,Slc32a1,Slc6a17,Syn2,Syn3,Syngr1,Wdr7
GO:0098800	inner mitochondrial membrane protein complex	13	131	2.5e-07	Afg3l2,Atp5e,Atp5o,Dnajc11,Gm10221,Ndufb7,Ndufb8,Ndufs8,Ndufv1,Park7,Sdha,Uqcrc1,Uqcrh
GO:0031090	organelle membrane	67	2740	3.1e-07	Actn1,Actr3,Afg3l2,Ap1g1,Ap2a2,Ap2b1,Ap2m1,Ap2s1,Arl3,Ass1,Atl3,Atp2a2,Atp5e,Atp5o,Atp6v1c1,Bsg,Cadps,Camkv,Cdc42,Cfl1,Cisd1,Ckmt1,Cltc,Cnp,Coro1a,Cst3,Dmxl2,Dnajc11,Dnm1,Eea1,Fis1,Gad2,Gbas,Gfap,Glg1,Gm10221,Hk1,Hsp90ab1,Hspa8,Kpnb1,Ndufb7,Ndufb8,Ndufs8,Ndufv1,Ntrk2,Ogdh,Park7,Pebp1,Rab7,Rac1,Rap2b,Rhob,Sdha,Slc25a3,Slc25a5,Slc32a1,Slc6a17,Syn2,Syn3,Syngr1,Trf,Uba1,Uchl1,Uqcrc1,Uqcrh,Vat1,Vcp
GO:0090533	cation-transporting ATPase complex	6	13	7.3e-07	Atp1a2,Atp1a3,Atp1b1,Atp1b2,Atp1b3,Atp2a2
GO:0014069	postsynaptic density	17	267	7.95e-07	Anks1b,Atp2b2,Cadm1,Dnajc6,Gng3,Gria3,Hspa8,Kcnab2,Nsf,Ntrk2,Ppp2ca,Prkcg,Rims1,Sipa1l1,Syn2,Syn3,Synpo
GO:0005911	cell-cell junction	21	417	1.01e-06	Actn1,Actr3,Atp1a2,Atp1b1,Cadm1,Cadm2,Cadm4,Capzb,Cdc42,Cfl1,Cntnap1,Coro1a,Fscn1,Nfasc,Prkcg,Rap2b,Rapgef2,Sh3bp1,Slc8a1,Synpo,Uba1
GO:0044425	membrane part	112	5857	1.12e-06	Adam22,Afg3l2,Anks1b,Ap1g1,Ap2a1,Ap2a2,Ap2b1,Ap2m1,Ap2s1,Arpc1a,Atl3,Atp1a2,Atp1a3,Atp1b1,Atp1b2,Atp1b3,Atp2a2,Atp2b1,Atp2b2,Atp5e,Atp5o,Atp6v1b2,Atp6v1c1,Atp8a2,Bsg,Cadm1,Cadm2,Cadm4,Capn2,Cd9,Cdc42,Cfl1,Cisd1,Ckmt1,Cltc,Cntnap1,Coro1a,Cplx1,Ctsb,Ctsd,Dctn1,Dnajc11,Dnm1,Eea1,Eef1a1,Fis1,Fscn1,Gad2,Gfap,Glg1,Gm10221,Gnai2,Gnao1,Gnaz,Gng3,Got2,Gpm6b,Gria3,Hk1,Hpca,Hsp90ab1,Hspa8,Icam5,Kcnab2,L1cam…
GO:0044455	mitochondrial membrane part	15	212	1.19e-06	Afg3l2,Atp5e,Atp5o,Ckmt1,Dnajc11,Fis1,Gm10221,Ndufb7,Ndufb8,Ndufs8,Ndufv1,Park7,Sdha,Uqcrc1,Uqcrh
GO:0030133	transport vesicle	18	320	1.69e-06	Ap1g1,Ap2a2,Cadm1,Cltc,Dmxl2,Dnm1,Gad2,Hspa8,Lgi3,Pebp1,Sept5,Sept6,Slc32a1,Slc6a17,Syn2,Syn3,Syngr1,Wdr7
GO:0005856	cytoskeleton	51	1933	1.93e-06	Actn1,Actr3,Aldoa,Ap1g1,Arl3,Arpc1a,Capzb,Cct3,Cct7,Cdc42,Cfl1,Cfl2,Cltc,Cnp,Coro1a,Csrp1,Dctn1,Dnm1,Dpysl2,Dpysl3,Dstn,Dync1h1,Dynll1,Dynll2,Eef1a1,Fscn1,Gfap,Gnai2,Hspa1b,Hspa8,Kbp,Kcnab2,Mapre3,Pfn2,Ppp2ca,Rac1,Sept3,Sept5,Sept6,Sept7,Sh3bp1,Sipa1l1,Slc25a5,Slc30a9,Slc8a1,Synpo,Tmsb4x,Tppp3,Tuba4a,Tuba8,Tubb3
GO:0098798	mitochondrial protein complex	16	255	2.01e-06	Afg3l2,Atp5e,Atp5o,Dlat,Dnajc11,Etfa,Gm10221,Ndufb7,Ndufb8,Ndufs8,Ndufv1,Park7,Sdha,Suclg1,Uqcrc1,Uqcrh
GO:0005759	mitochondrial matrix	18	327	2.19e-06	Abat,Cs,Dlat,Dld,Echs1,Etfa,Glrx5,Glud1,Got2,Hspa1b,Mdh2,Oat,Ogdh,Park7,Pcca,Pdha1,Slc25a5,Suclg1
GO:0012506	vesicle membrane	21	449	2.85e-06	Actn1,Ap1g1,Ap2a2,Ap2b1,Ap2m1,Ap2s1,Atp2a2,Bsg,Cadps,Camkv,Cltc,Coro1a,Dmxl2,Gad2,Rab7,Slc32a1,Slc6a17,Syn2,Syn3,Syngr1,Trf
GO:0030659	cytoplasmic vesicle membrane	20	424	4.75e-06	Actn1,Ap1g1,Ap2a2,Ap2b1,Ap2m1,Ap2s1,Bsg,Cadps,Camkv,Cltc,Coro1a,Dmxl2,Gad2,Rab7,Slc32a1,Slc6a17,Syn2,Syn3,Syngr1,Trf
GO:0005890	sodium:potassium-exchanging ATPase complex	5	10	5.64e-06	Atp1a2,Atp1a3,Atp1b1,Atp1b2,Atp1b3
GO:0098588	bounding membrane of organelle	42	1513	7.06e-06	Actn1,Actr3,Ap1g1,Ap2a2,Ap2b1,Ap2m1,Ap2s1,Arl3,Ass1,Atp2a2,Atp6v1c1,Bsg,Cdc42,Cisd1,Cltc,Cnp,Coro1a,Dmxl2,Dnajc11,Eea1,Fis1,Gad2,Gbas,Gfap,Glg1,Hk1,Hsp90ab1,Hspa8,Ntrk2,Pebp1,Rab7,Rac1,Rap2b,Rhob,Slc32a1,Slc6a17,Syn2,Syn3,Syngr1,Trf,Uba1,Vat1
GO:0005743	mitochondrial inner membrane	17	321	7.37e-06	Afg3l2,Atp5e,Atp5o,Ckmt1,Cnp,Dnajc11,Gm10221,Ndufb7,Ndufb8,Ndufs8,Ndufv1,Park7,Sdha,Slc25a3,Slc25a5,Uqcrc1,Uqcrh
GO:0044433	cytoplasmic vesicle part	27	746	7.38e-06	Actn1,Ap1g1,Ap2a2,Ap2b1,Ap2m1,Ap2s1,Bsg,Cadps,Camkv,Cltc,Coro1a,Dld,Dmxl2,Eea1,Gad2,Ntrk2,Rab7,Rac1,Rap2b,Rhob,Slc32a1,Slc6a17,Syn2,Syn3,Syngr1,Trf,Uba1
GO:0030125	clathrin vesicle coat	6	23	8.83e-06	Ap1g1,Ap2a2,Ap2b1,Ap2m1,Ap2s1,Cltc
GO:0015629	actin cytoskeleton	19	410	1.09e-05	Actn1,Actr3,Aldoa,Arpc1a,Capzb,Cfl1,Cfl2,Coro1a,Csrp1,Dctn1,Dpysl3,Dstn,Dynll2,Eef1a1,Fscn1,Sept5,Sept7,Sh3bp1,Synpo
GO:0099513	polymeric cytoskeletal fiber	23	581	1.13e-05	Actn1,Arl3,Capzb,Cct3,Cct7,Cltc,Cnp,Coro1a,Dctn1,Dnm1,Dpysl3,Dync1h1,Dynll1,Dynll2,Fscn1,Gfap,Hspa8,Mapre3,Slc8a1,Tppp3,Tuba4a,Tuba8,Tubb3
GO:0045121	membrane raft	18	374	1.22e-05	Atp1a2,Atp1b1,Atp1b3,Atp2b1,Atp2b2,Bsg,Capn2,Ctsd,Gnai2,Gpm6b,Hk1,Hspa8,L1cam,Mag,Mog,Park7,Rap2b,Slc25a5
GO:0044448	cell cortex part	11	136	1.39e-05	Actn1,Capzb,Cfl1,Coro1a,Dctn1,Dstn,Eef1a1,Rims1,Sept5,Sept6,Sept7
GO:0030117	membrane coat	9	87	1.87e-05	Ap1g1,Ap2a1,Ap2a2,Ap2b1,Ap2m1,Ap2s1,Cltc,Dnm1,Trf
GO:0030120	vesicle coat	7	46	2.4e-05	Ap1g1,Ap2a2,Ap2b1,Ap2m1,Ap2s1,Cltc,Trf
GO:0030131	clathrin adaptor complex	6	29	2.53e-05	Ap1g1,Ap2a1,Ap2a2,Ap2b1,Ap2m1,Ap2s1
GO:0030118	clathrin coat	7	47	2.67e-05	Ap1g1,Ap2a1,Ap2a2,Ap2b1,Ap2m1,Ap2s1,Cltc
GO:0043231	intracellular membrane-bounded organelle	149	9088	2.67e-05	AW549877,Abat,Acaa1a,Acly,Actn1,Actr3,Adh5,Afg3l2,Aldh5a1,Aldoa,Anks1b,Ap1g1,Ap2b1,Arl3,Ass1,Atl3,Atp1a3,Atp2a2,Atp2b1,Atp2b2,Atp5e,Atp5o,Atp6v1b2,Atp6v1c1,Atp8a2,Bsg,Cand1,Capn2,Cbr1,Cbr3,Cdc42,Celf4,Cfl1,Cfl2,Cisd1,Ckmt1,Cltc,Cnp,Cops8,Cs,Csrp1,Cst3,Ctbp1,Ctsb,Ctsd,Dctn1,Dip2b,Dlat,Dld,Dnaja2,Dnajc11,Dnm1,Dync1h1,Dynll1,Echs1,Eef1a1,Eef1a2,Eef1g,Etfa,Fasn,Fis1,Gad2,Gbas,Gdi1,Gdi2,Gfap,Glg1,Glrx…
GO:0099512	supramolecular fiber	27	809	2.73e-05	Actn1,Aldoa,Arl3,Capzb,Cct3,Cct7,Cfl2,Cltc,Cnp,Coro1a,Cst3,Dctn1,Dnm1,Dpysl3,Dync1h1,Dynll1,Dynll2,Fscn1,Gfap,Hspa8,Mapre3,Slc8a1,Synpo,Tppp3,Tuba4a,Tuba8,Tubb3
GO:0031967	organelle envelope	31	1015	2.94e-05	Afg3l2,Ass1,Atp5e,Atp5o,Cfl1,Cisd1,Ckmt1,Cnp,Cst3,Dctn1,Dnajc11,Dnm1,Dync1h1,Fis1,Gbas,Gm10221,Hk1,Kpnb1,Ndufb7,Ndufb8,Ndufs8,Ndufv1,Ogdh,Park7,Pebp1,Sdha,Slc25a3,Slc25a5,Uqcrc1,Uqcrh,Vat1
GO:0030132	clathrin coat of coated pit	5	18	4.49e-05	Ap2a2,Ap2b1,Ap2m1,Ap2s1,Cltc
GO:0005874	microtubule	17	377	4.52e-05	Arl3,Cct3,Cct7,Cltc,Cnp,Dctn1,Dnm1,Dync1h1,Dynll1,Dynll2,Hspa8,Mapre3,Slc8a1,Tppp3,Tuba4a,Tuba8,Tubb3
GO:1904949	ATPase complex	8	77	5.63e-05	Atp1a2,Atp1a3,Atp1b1,Atp1b2,Atp1b3,Atp2a2,Smarcc2,Vcp
GO:0098803	respiratory chain complex	8	78	6.08e-05	Ndufb7,Ndufb8,Ndufs8,Ndufv1,Park7,Sdha,Uqcrc1,Uqcrh
GO:0005746	mitochondrial respirasome	8	79	6.56e-05	Ndufb7,Ndufb8,Ndufs8,Ndufv1,Park7,Sdha,Uqcrc1,Uqcrh
GO:0044430	cytoskeletal part	38	1460	7.84e-05	Actn1,Actr3,Arl3,Arpc1a,Capzb,Cct3,Cct7,Cdc42,Cfl1,Cltc,Cnp,Coro1a,Dctn1,Dnm1,Dpysl3,Dstn,Dync1h1,Dynll1,Dynll2,Eef1a1,Fscn1,Gfap,Gnai2,Hspa1b,Hspa8,Mapre3,Ppp2ca,Rac1,Sept5,Sept6,Sept7,Slc25a5,Slc8a1,Synpo,Tppp3,Tuba4a,Tuba8,Tubb3
GO:0005905	clathrin-coated pit	7	62	0.00012	Ap2a1,Ap2a2,Ap2b1,Ap2m1,Ap2s1,Cltc,Trf
GO:0045334	clathrin-coated endocytic vesicle	5	24	0.00014	Ap2a2,Ap2b1,Ap2m1,Ap2s1,Cpne6
GO:0098797	plasma membrane protein complex	18	461	0.00014	Ap2a2,Ap2b1,Ap2m1,Ap2s1,Atp1a2,Atp1a3,Atp1b1,Atp1b2,Atp1b3,Cltc,Gnai2,Gnao1,Gnaz,Gng3,Gria3,Kcnab2,Scn2b,Trf
GO:0012505	endomembrane system	72	3670	0.00016	Actn1,Actr3,Ap1g1,Ap2a1,Ap2a2,Ap2b1,Ap2m1,Ap2s1,Arl3,Ass1,Atl3,Atp1a2,Atp1a3,Atp2a2,Atp2b2,Atp6v1b2,Atp8a2,Bsg,Cadm1,Cadps,Cand1,Capn2,Cdc42,Cltc,Coro1a,Cpne6,Cst3,Dctn1,Dld,Dmxl2,Dnm1,Dync1h1,Dynll1,Eea1,Fasn,Fis1,Gad2,Gdi1,Gdi2,Glg1,Hspa8,Kpnb1,L1cam,Lgi3,Ndufb8,Nsf,Ntrk2,Ociad1,P4hb,Park7,Pebp1,Rab7,Rac1,Rap2b,Rapgef2,Rhob,Sept5,Sept6,Slc30a9,Slc32a1,Slc6a17,Syn2,Syn3,Syngr1,Synpo,Tpt1,Trf,Uba…
GO:0097060	synaptic membrane	15	339	0.00017	Anks1b,Atp2b1,Atp2b2,Cfl1,Gad2,Gria3,L1cam,Ntrk2,Prkcg,Rims1,Sept3,Sipa1l1,Slc1a2,Slc8a1,Synpo
GO:0030122	AP-2 adaptor complex	4	12	0.00019	Ap2a2,Ap2b1,Ap2m1,Ap2s1
GO:0031252	cell leading edge	16	393	0.00024	Actn1,Actr3,Atp2b1,Atp6v1b2,Capzb,Cdc42,Cfl1,Coro1a,Dctn1,Dpysl3,Eef1a1,Fscn1,Hpca,Rac1,Sh3bp1,Slc1a2
GO:0043232	intracellular non-membrane-bounded organelle	73	3809	0.00028	Actn1,Actr3,Aldoa,Ap1g1,Arl3,Arpc1a,Capn2,Capzb,Cct3,Cct7,Cdc42,Cfl1,Cfl2,Cltc,Cnp,Coro1a,Csrp1,Cst3,Ctsb,Dctn1,Dnm1,Dpysl2,Dpysl3,Dstn,Dync1h1,Dynll1,Dynll2,Eef1a1,Fscn1,Gfap,Gnai2,Hnrnpl,Hspa1b,Hspa4,Hspa8,Idh3g,Kbp,Kcnab2,Khsrp,Kpnb1,Mapre3,Pabpc1,Park7,Pdha1,Pfn2,Ppp1cb,Ppp2ca,Ppp2r1a,Rab7,Rac1,Rpl23,Rps17,Sdha,Selenbp1,Sept3,Sept5,Sept6,Sept7,Sh3bp1,Sipa1l1,Slc25a5,Slc30a9,Slc8a1,Smarcc2,Syn…
GO:0048471	perinuclear region of cytoplasm	23	730	0.00028	Actr3,Ap1g1,Atp2a2,Capn2,Capzb,Cnp,Cops8,Cst3,Ctsb,Gad2,Hectd3,Hnrnpl,Hsp90ab1,Hspa8,Mapre3,Ntm,Park7,Prdx5,Prkcg,Rapgef2,Tppp3,Trf,Vcp
GO:0043204	perikaryon	10	170	0.00038	Ass1,Ckmt1,Cpne6,Got2,Gria3,Hpca,Hspa8,Ntrk2,Pcmt1,Synpo
GO:0044304	main axon	7	78	0.0004	Cadm1,Cntnap1,Dnm1,Kcnab2,Mag,Nfasc,Slc1a2
GO:0061827	sperm head	4	16	0.00045	Actr3,Aldoa,Hsp90ab1,Park7
GO:0030139	endocytic vesicle	10	176	0.00049	Ap2a2,Ap2b1,Ap2m1,Ap2s1,Cdc42,Coro1a,Cpne6,Rab7,Rapgef2,Trf
GO:0030136	clathrin-coated vesicle	8	113	0.00059	Ap1g1,Ap2a1,Ap2a2,Ap2b1,Ap2m1,Ap2s1,Cltc,Cpne6
GO:0042383	sarcolemma	9	147	0.00063	Atp1a2,Atp1a3,Atp1b1,Bsg,Cltc,Ctsb,Got2,Ppp3r1,Slc8a1
GO:0101031	chaperone complex	4	18	0.00064	Cct3,Cct7,Hspa8,Stip1
GO:0031105	septin complex	3	6	0.00069	Sept5,Sept6,Sept7
GO:0030658	transport vesicle membrane	9	153	0.00081	Ap1g1,Cltc,Dmxl2,Gad2,Slc32a1,Slc6a17,Syn2,Syn3,Syngr1
GO:0030672	synaptic vesicle membrane	7	91	0.00093	Dmxl2,Gad2,Slc32a1,Slc6a17,Syn2,Syn3,Syngr1
GO:0030666	endocytic vesicle membrane	6	65	0.0011	Ap2a2,Ap2b1,Ap2m1,Ap2s1,Coro1a,Rab7
GO:0005741	mitochondrial outer membrane	9	165	0.0013	Ass1,Cisd1,Cnp,Dnajc11,Fis1,Gbas,Hk1,Pebp1,Vat1
GO:0019897	extrinsic component of plasma membrane	9	164	0.0013	Atp2a2,Eea1,Gnai2,Gnao1,Gnaz,Gng3,Kcnab2,Rac1,Trf
GO:0030496	midbody	9	165	0.0013	Arl3,Cdc42,Gdi1,Gnai2,Mapre3,Pin1,Sept6,Sept7,Sh3bp1
GO:0045254	pyruvate dehydrogenase complex	3	8	0.0013	Dlat,Dld,Pdha1
GO:0005868	cytoplasmic dynein complex	4	24	0.0016	Dctn1,Dync1h1,Dynll1,Dynll2
GO:0044291	cell-cell contact zone	6	71	0.0016	Actn1,Atp1a2,Atp1b1,Capzb,Rap2b,Slc8a1
GO:0005747	mitochondrial respiratory chain complex I	5	46	0.0017	Ndufb7,Ndufb8,Ndufs8,Ndufv1,Park7
GO:0016469	proton-transporting two-sector ATPase complex	5	46	0.0017	Atp5e,Atp5o,Atp6v1b2,Atp6v1c1,Gm10221
GO:0030135	coated vesicle	9	172	0.0017	Ap1g1,Ap2a1,Ap2a2,Ap2b1,Ap2m1,Ap2s1,Cltc,Cpne6,Trf
GO:0032432	actin filament bundle	6	72	0.0017	Actn1,Cfl1,Fscn1,Sept5,Sept7,Synpo
GO:0099568	cytoplasmic region	15	439	0.002	Actn1,Arl3,Capzb,Cfl1,Coro1a,Dctn1,Dstn,Dynll1,Eef1a1,Hpca,Rims1,Sept5,Sept6,Sept7,Uchl1
GO:0032154	cleavage furrow	5	53	0.0029	Rhob,Sept5,Sept6,Sept7,Sh3bp1
GO:0019898	extrinsic component of membrane	11	273	0.003	Atp2a2,Eea1,Gnai2,Gnao1,Gnaz,Gng3,Hpca,Kcnab2,Rab7,Rac1,Trf
GO:0030027	lamellipodium	9	189	0.003	Actr3,Capzb,Cdc42,Cfl1,Coro1a,Dpysl3,Fscn1,Rac1,Sh3bp1
GO:0031253	cell projection membrane	12	316	0.003	Arpc1a,Atp2b1,Cdc42,Cfl1,Eef1a1,Fscn1,Hpca,Hsp90ab1,Pcmt1,Rac1,Sh3bp1,Slc1a2
GO:0045239	tricarboxylic acid cycle enzyme complex	3	12	0.003	Dld,Ogdh,Suclg1
GO:0005768	endosome	21	779	0.0033	Ap1g1,Atp1a2,Atp8a2,Cltc,Coro1a,Cpne6,Cst3,Eea1,Hspa8,L1cam,Ntrk2,Ociad1,Rab7,Rac1,Rap2b,Rapgef2,Rhob,Tpt1,Trf,Uba1,Vipas39
GO:0005834	heterotrimeric G-protein complex	4	31	0.0033	Gnai2,Gnao1,Gnaz,Gng3
GO:0002199	zona pellucida receptor complex	3	13	0.0034	Cct3,Cct7,Hspa1b
GO:0005940	septin ring	2	2	0.0034	Sept6,Sept7
GO:0014704	intercalated disc	5	56	0.0034	Actn1,Atp1a2,Atp1b1,Capzb,Slc8a1
GO:0030863	cortical cytoskeleton	6	85	0.0034	Actn1,Capzb,Cfl1,Coro1a,Dstn,Eef1a1
GO:0032809	neuronal cell body membrane	4	32	0.0036	Atp2b1,Atp2b2,Cadm2,Hpca
GO:0033178	proton-transporting two-sector ATPase complex, catalytic domain	3	14	0.004	Atp5e,Atp6v1b2,Atp6v1c1
GO:0033270	paranode region of axon	3	14	0.004	Cntnap1,Mag,Nfasc
GO:0031256	leading edge membrane	8	161	0.0042	Atp2b1,Cdc42,Cfl1,Eef1a1,Hpca,Rac1,Sh3bp1,Slc1a2
GO:0097223	sperm part	10	243	0.0042	Actr3,Aldoa,Bsg,Dld,Gstm5,Hk1,Hsp90ab1,Park7,Sept6,Sept7
GO:0001725	stress fiber	5	63	0.0052	Actn1,Fscn1,Sept5,Sept7,Synpo
GO:0001726	ruffle	8	168	0.0052	Actn1,Actr3,Atp6v1b2,Cfl1,Eef1a1,Fscn1,Rac1,Sh3bp1
GO:0005945	6-phosphofructokinase complex	2	3	0.0052	Pfkl,Pfkp
GO:0009331	glycerol-3-phosphate dehydrogenase complex	2	3	0.0052	Gpd1,Gpd1l
GO:0015630	microtubule cytoskeleton	26	1106	0.0052	Ap1g1,Arl3,Cct3,Cct7,Cdc42,Cltc,Cnp,Dctn1,Dnm1,Dync1h1,Dynll1,Dynll2,Gnai2,Hspa1b,Hspa8,Mapre3,Ppp2ca,Rac1,Sept6,Sept7,Slc25a5,Slc8a1,Tppp3,Tuba4a,Tuba8,Tubb3
GO:0098858	actin-based cell projection	9	216	0.0063	Ap2a1,Atp6v1b2,Cbr1,Cfl1,Cnp,Coro1a,Dync1h1,Fscn1,Nfasc
GO:0043198	dendritic shaft	5	67	0.0065	Gria3,Hspa8,Nsf,Slc1a2,Slc8a1
GO:0044292	dendrite terminus	3	20	0.0091	Hsp90ab1,L1cam,Slc32a1
GO:0008287	protein serine/threonine phosphatase complex	4	44	0.0094	Ppp1cb,Ppp2ca,Ppp2r1a,Ppp3r1
GO:0045177	apical part of cell	13	423	0.0094	Ap2a1,Atp1b1,Atp1b2,Atp2b1,Atp2b2,Atp6v1c1,Cd9,Cdc42,Ctsb,Hsp90ab1,Pebp1,Rapgef2,Trf
GO:0005753	mitochondrial proton-transporting ATP synthase complex	3	21	0.0101	Atp5e,Atp5o,Gm10221
GO:0097227	sperm annulus	2	5	0.0101	Sept6,Sept7
GO:0031234	extrinsic component of cytoplasmic side of plasma membrane	6	111	0.0104	Atp2a2,Gnai2,Gnao1,Gnaz,Gng3,Kcnab2
GO:0070013	intracellular organelle lumen	66	3882	0.0111	AW549877,Abat,Acaa1a,Acly,Aldoa,Atp2a2,Atp8a2,Cand1,Cbr3,Cfl1,Cfl2,Cnp,Cops8,Cs,Csrp1,Ctbp1,Ctsb,Dlat,Dld,Dnm1,Echs1,Eef1a1,Etfa,Glrx5,Glud1,Gnai2,Got2,Hint1,Hnrnpl,Hnrnpul2,Hspa1b,Hspa8,Hsph1,Idh3g,Khsrp,Kpnb1,Mdh2,Ndufb7,Oat,Ogdh,P4hb,Park7,Pcbp2,Pcca,Pdha1,Pin1,Ppp1cb,Prdx5,Psma5,Psmd4,Rnh1,Rpl23,Sdha,Selenbp1,Slc25a5,Slc8a1,Smarcc2,Snrnp200,Suclg1,Tardbp,Tpt1,Trim28,Uba1,Ube2v2,Uchl1,Vcp
GO:0031258	lamellipodium membrane	3	23	0.0122	Cdc42,Cfl1,Sh3bp1
GO:0060077	inhibitory synapse	3	23	0.0122	Gad2,Rims1,Slc32a1
GO:0005884	actin filament	5	80	0.0123	Actn1,Capzb,Coro1a,Dpysl3,Fscn1
GO:0070062	extracellular exosome	5	80	0.0123	Aldoa,Cd9,Hspa4,Hspa8,Rap2b
GO:0035749	myelin sheath adaxonal region	2	6	0.0125	Cnp,Mag
GO:0045252	oxoglutarate dehydrogenase complex	2	6	0.0125	Dld,Ogdh
GO:0098562	cytoplasmic side of membrane	8	199	0.0125	Atp2a2,Atp2b1,Gfap,Gnai2,Gnao1,Gnaz,Gng3,Kcnab2
GO:0001891	phagocytic cup	3	25	0.0145	Coro1a,Rac1,Sh3bp1
GO:0005913	cell-cell adherens junction	5	84	0.0145	Actn1,Actr3,Cadm1,Cadm2,Cadm4
GO:0033180	proton-transporting V-type ATPase, V1 domain	2	7	0.0156	Atp6v1b2,Atp6v1c1
GO:0042587	glycogen granule	2	7	0.0156	Fasn,Ppp1cb
GO:0030426	growth cone	8	209	0.016	Cfl1,Dpysl2,Dpysl3,Fscn1,Hsp90ab1,L1cam,Ntrk2,Ptbp2
GO:0030864	cortical actin cytoskeleton	4	54	0.0166	Cfl1,Coro1a,Dstn,Eef1a1
GO:0030018	Z disc	6	127	0.0176	Actn1,Aldoa,Capzb,Cfl2,Slc8a1,Synpo
GO:0005773	vacuole	14	519	0.0177	Ass1,Atp6v1c1,Capn2,Cdc42,Cltc,Cst3,Ctsb,Ctsd,Dld,Gfap,Hsp90ab1,Hspa8,Rab7,Uba1
GO:0033010	paranodal junction	2	8	0.0186	Cntnap1,Nfasc
GO:0071541	eukaryotic translation initiation factor 3 complex, eIF3m	2	8	0.0186	Eif3c,Eif3f
GO:0030315	T-tubule	4	58	0.0203	Atp1a2,Cltc,Got2,Slc8a1
GO:0042734	presynaptic membrane	5	93	0.0205	Gad2,L1cam,Rims1,Sept3,Slc1a2
GO:1905368	peptidase complex	5	93	0.0205	Afg3l2,Psma5,Psmd4,Usp14,Vcp
GO:0005764	lysosome	12	422	0.0208	Ass1,Atp6v1c1,Capn2,Cltc,Cst3,Ctsb,Ctsd,Gfap,Hsp90ab1,Hspa8,Rab7,Uba1
GO:0009898	cytoplasmic side of plasma membrane	7	177	0.0215	Atp2a2,Atp2b1,Gnai2,Gnao1,Gnaz,Gng3,Kcnab2
GO:0005902	microvillus	5	95	0.0217	Atp6v1b2,Cbr1,Cnp,Fscn1,Nfasc
GO:0005770	late endosome	8	225	0.0224	Cst3,Hspa8,Rab7,Rapgef2,Rhob,Tpt1,Trf,Vipas39
GO:1902495	transmembrane transporter complex	9	273	0.0224	Atp1a2,Atp1a3,Atp1b1,Atp1b2,Atp1b3,Atp2a2,Gria3,Kcnab2,Scn2b
GO:0005832	chaperonin-containing T-complex	2	10	0.0252	Cct3,Cct7
GO:0005885	Arp2/3 protein complex	2	10	0.0252	Actr3,Arpc1a
GO:0030130	clathrin coat of trans-Golgi network vesicle	2	10	0.0252	Ap1g1,Cltc
GO:0051286	cell tip	2	10	0.0252	Slc32a1,Trf
GO:0070852	cell body fiber	2	10	0.0252	Ass1,Cadm1
GO:0005634	nucleus	93	6086	0.0261	AW549877,Acly,Actn1,Adh5,Aldoa,Anks1b,Arl3,Ass1,Atp1a3,Atp2a2,Atp2b1,Atp8a2,Cand1,Capn2,Cbr1,Cbr3,Celf4,Cfl1,Cfl2,Cnp,Cops8,Csrp1,Cst3,Ctbp1,Ctsb,Dctn1,Dip2b,Dld,Dnaja2,Dnm1,Dync1h1,Dynll1,Eef1a1,Eef1a2,Eef1g,Glrx5,Gnai2,Hdlbp,Hint1,Hnrnpl,Hnrnpul2,Hsp90ab1,Hspa4,Hspa4l,Hspa8,Hsph1,Idh3g,Isoc2a,Khsrp,Kpnb1,Nudt3,Oat,Ogdh,Pabpc1,Park7,Pcbp2,Pdha1,Pgam1,Pin1,Pkm,Ppp1cb,Ppp2ca,Prdx5,Prkcg,Psma5,Psmd…
GO:0098862	cluster of actin-based cell projections	7	189	0.028	Actn1,Actr3,Capzb,Coro1a,Hsp90ab1,Pcmt1,Rac1
GO:0005750	mitochondrial respiratory chain complex III	2	11	0.0285	Uqcrc1,Uqcrh
GO:0016324	apical plasma membrane	10	339	0.0288	Ap2a1,Atp1b1,Atp1b2,Atp2b1,Atp2b2,Cd9,Ctsb,Hsp90ab1,Rapgef2,Trf
GO:0000502	proteasome complex	4	67	0.0295	Psma5,Psmd4,Usp14,Vcp
GO:0005887	integral component of plasma membrane	23	1115	0.0318	Atp1a2,Atp1a3,Atp1b1,Atp1b2,Atp1b3,Atp2b1,Atp2b2,Bsg,Cadm1,Cadm2,Cadm4,Cd9,Gria3,Icam5,Kcnab2,Mag,Ntrk2,Scn2b,Sirpa,Slc1a2,Slc32a1,Slc6a17,Slc8a1
GO:0016323	basolateral plasma membrane	8	243	0.0318	Ap2a1,Atp1b1,Atp2b1,Cadm1,Hsp90ab1,Pcmt1,Slc8a1,Trf
GO:0000276	mitochondrial proton-transporting ATP synthase complex, coupling factor F(o)	2	12	0.0322	Atp5o,Gm10221
GO:0035686	sperm fibrous sheath	2	12	0.0322	Aldoa,Gstm5
GO:0044327	dendritic spine head	2	12	0.0322	Atp1a3,Hpca
GO:0098552	side of membrane	13	514	0.0331	Atp2a2,Atp2b1,Cd9,Ctsb,Gfap,Gnai2,Gnao1,Gnaz,Gng3,Kcnab2,L1cam,P4hb,Trf
GO:0036126	sperm flagellum	5	109	0.0332	Aldoa,Gstm5,Hk1,Sept6,Sept7
GO:0044294	dendritic growth cone	2	13	0.0359	Hsp90ab1,L1cam
GO:1990124	messenger ribonucleoprotein complex	2	13	0.0359	Hspa8,Pabpc1
GO:0048786	presynaptic active zone	3	39	0.0366	Ntrk2,Rims1,Slc32a1
GO:0055037	recycling endosome	6	156	0.0366	Ap1g1,Eea1,Rac1,Rap2b,Trf,Vipas39
GO:0060076	excitatory synapse	3	39	0.0366	Actr3,Ntm,Ntrk2
GO:0031143	pseudopodium	2	14	0.0396	Capn2,Cnp
GO:0035371	microtubule plus-end	2	15	0.044	Dctn1,Mapre3
GO:0030141	secretory granule	10	371	0.0459	Actn1,Ap2a1,Ap2a2,Ap2m1,Bsg,Cadps,Cdc42,Dld,Dynll1,Rab7
GO:0043196	varicosity	2	16	0.0487	Cadm1,Dnm1
GO:0005819	spindle	9	321	0.049	Arl3,Cdc42,Cltc,Dctn1,Dynll1,Ppp2ca,Sept6,Sept7,Slc25a5

## Sheet: S8
	S8. Table S8 The Molecular Function (MF) Associated with the Differentially Expressed Proteins in the AD+SMC/AD Group.
	Se-methylselenocysteine (SMC) Improves Cognitive Deficits by Attenuating Synaptic and Metabolic Abnormalities in Alzheimer's Mice Model: A Proteomic Study Xiubo Du1#, Qingqing Shi1#, Yuxi Zhao1, Yongli Xie1, Xuexia Li1, Qiong Liu1, Javed Iqbal1, Huajie Zhang1,2, Xukun Liu1,3, Liming Shen1* 1Shenzhen Key Laboratory of Marine Biotechnology and Ecology, College of Life Science and Oceanography, Shen…
#term ID	Term description	Observed gene count	Background gene count	False discovery rate	Matching proteins
GO:0005488	binding	229	10884	1.94e-30	Abat,Acly,Actn1,Actr3,Adh5,Adssl1,Afg3l2,Aldh5a1,Aldoa,Anks1b,Ap1g1,Ap2a1,Ap2a2,Ap2b1,Ap2m1,Arl3,Arpc1a,Ass1,Atl3,Atp1a2,Atp1a3,Atp1b1,Atp1b2,Atp1b3,Atp2a2,Atp2b1,Atp2b2,Atp5o,Atp6v1b2,Atp8a2,Blmh,Bsg,C1qb,Cadm1,Cadm2,Cadm4,Cadps,Camkv,Cand1,Capn2,Capzb,Cbr3,Cct3,Cct7,Cd9,Cdc42,Celf4,Cfl1,Cfl2,Chordc1,Cisd1,Ckmt1,Cltc,Cnp,Cntnap1,Coro1a,Cplx1,Cpne6,Csrp1,Cst3,Ctbp1,Ctsb,Ctsd,Dctn1,Ddah1,Dlat,Dld,…
GO:0005515	protein binding	172	6454	2.55e-28	Abat,Actn1,Actr3,Adh5,Adssl1,Aldoa,Anks1b,Ap1g1,Ap2a1,Ap2a2,Ap2b1,Ap2m1,Arl3,Arpc1a,Ass1,Atl3,Atp1a2,Atp1a3,Atp1b1,Atp1b2,Atp1b3,Atp2a2,Atp2b1,Atp2b2,Blmh,C1qb,Cadm1,Cadm2,Cadm4,Cadps,Camkv,Cand1,Capn2,Capzb,Cct3,Cct7,Cd9,Cdc42,Cfl1,Cfl2,Chordc1,Cisd1,Ckmt1,Cltc,Cntnap1,Coro1a,Cplx1,Cst3,Ctbp1,Ctsb,Dctn1,Dlat,Dmxl2,Dnaja2,Dnajc6,Dnm1,Dpysl2,Dpysl3,Dstn,Dync1h1,Dynll1,Dynll2,Eea1,Eef1a1,Eef1a2,Eif…
GO:0036094	small molecule binding	95	2364	1.31e-23	Abat,Acly,Actr3,Adh5,Adssl1,Afg3l2,Aldh5a1,Aldoa,Arl3,Ass1,Atl3,Atp1a2,Atp1a3,Atp1b1,Atp2a2,Atp2b1,Atp2b2,Atp6v1b2,Atp8a2,Bsg,Camkv,Cbr3,Cct3,Cct7,Cdc42,Chordc1,Ckmt1,Cnp,Ctbp1,Ddah1,Dld,Dnaja2,Dnm1,Dync1h1,Eef1a1,Eef1a2,Etfa,Fasn,Gad2,Glud1,Gnai2,Gnao1,Gnaz,Got2,Gpd1,Gpd1l,Hint1,Hk1,Hsp90ab1,Hspa1b,Hspa4,Hspa4l,Hspa8,Hsph1,Idh3g,Itpka,L1cam,Mag,Ndufv1,Nsf,Ntrk2,Oat,Ogdh,Pcca,Pebp1,Pfkl,Pfkp,Pkm,…
GO:0043168	anion binding	97	2578	2.91e-22	Abat,Acly,Actr3,Adh5,Adssl1,Afg3l2,Aldh5a1,Ap2a2,Arl3,Ass1,Atl3,Atp1a2,Atp1a3,Atp1b1,Atp2a2,Atp2b1,Atp2b2,Atp6v1b2,Atp8a2,Cadps,Camkv,Cbr3,Cct3,Cct7,Cdc42,Cfl1,Chordc1,Ckmt1,Cpne6,Ddah1,Dld,Dnaja2,Dnm1,Dpysl3,Dync1h1,Eea1,Eef1a1,Eef1a2,Etfa,Fasn,Gad2,Glud1,Gnai2,Gnao1,Gnaz,Got2,Gstm5,Hk1,Hsp90ab1,Hspa1b,Hspa4,Hspa4l,Hspa8,Hsph1,Idh3g,Itpka,L1cam,Lxn,Mag,Ndufv1,Nsf,Ntrk2,Oat,Ogdh,Pcca,Pebp1,Pfkl,P…
GO:0000166	nucleotide binding	82	2006	2.34e-20	Acly,Actr3,Adssl1,Afg3l2,Aldh5a1,Arl3,Ass1,Atl3,Atp1a2,Atp1a3,Atp1b1,Atp2a2,Atp2b1,Atp2b2,Atp6v1b2,Atp8a2,Camkv,Cbr3,Cct3,Cct7,Cdc42,Chordc1,Ckmt1,Cnp,Ctbp1,Dld,Dnaja2,Dnm1,Dync1h1,Eef1a1,Eef1a2,Etfa,Fasn,Glud1,Gnai2,Gnao1,Gnaz,Gpd1,Gpd1l,Hint1,Hk1,Hsp90ab1,Hspa1b,Hspa4,Hspa4l,Hspa8,Hsph1,Idh3g,Itpka,Ndufv1,Nsf,Ntrk2,Pcca,Pebp1,Pfkl,Pfkp,Pkm,Prkcg,Prps1,Qdpr,Rab7,Rac1,Rap2b,Rapgef2,Rhob,Sdha,Sept…
GO:0003824	catalytic activity	138	5239	8.59e-20	Abat,Acaa1a,Acly,Adam22,Adh5,Adssl1,Afg3l2,Aldh5a1,Aldoa,Arl3,Ass1,Atl3,Atp1a2,Atp1a3,Atp1b1,Atp1b2,Atp1b3,Atp2a2,Atp2b1,Atp2b2,Atp5e,Atp5o,Atp6v1b2,Atp6v1c1,Atp8a2,Blmh,Camkv,Capn2,Cbr1,Cbr3,Cdc42,Ckmt1,Cnp,Cs,Ctbp1,Ctsb,Ctsd,Dctn1,Ddah1,Dip2b,Dlat,Dld,Dnajc6,Dnm1,Dpysl2,Dpysl3,Dync1h1,Dynll1,Dynll2,Echs1,Eef1a1,Eef1a2,Eef1g,Eif3f,Etfa,Fah,Fahd2a,Fasn,Fbxl16,Gad2,Gfod1,Glrx5,Glud1,Gm10221,Gnai2,…
GO:0097367	carbohydrate derivative binding	76	2051	2.13e-16	Acly,Actr3,Adssl1,Afg3l2,Arl3,Ass1,Atl3,Atp1a2,Atp1a3,Atp1b1,Atp2a2,Atp2b1,Atp2b2,Atp6v1b2,Atp8a2,Camkv,Cct3,Cct7,Cdc42,Chordc1,Ckmt1,Ctsb,Dnaja2,Dnm1,Dpysl3,Dync1h1,Eef1a1,Eef1a2,Glud1,Gnai2,Gnao1,Gnaz,Hk1,Hsp90ab1,Hspa1b,Hspa4,Hspa4l,Hspa8,Hsph1,Idh3g,Itpka,L1cam,Lxn,Mag,Ndufv1,Nsf,Ntrk2,Pcca,Pebp1,Pfkl,Pfkp,Pkm,Prkcg,Prps1,Rab7,Rac1,Rap2b,Rapgef2,Rhob,Sept3,Sept5,Sept6,Sept7,Snrnp200,Suclg1,Sy…
GO:0032553	ribonucleotide binding	70	1781	3.17e-16	Acly,Actr3,Adssl1,Afg3l2,Arl3,Ass1,Atl3,Atp1a2,Atp1a3,Atp1b1,Atp2a2,Atp2b1,Atp2b2,Atp6v1b2,Atp8a2,Camkv,Cct3,Cct7,Cdc42,Chordc1,Ckmt1,Dnaja2,Dnm1,Dync1h1,Eef1a1,Eef1a2,Glud1,Gnai2,Gnao1,Gnaz,Hk1,Hsp90ab1,Hspa1b,Hspa4,Hspa4l,Hspa8,Hsph1,Idh3g,Itpka,Ndufv1,Nsf,Ntrk2,Pcca,Pebp1,Pfkl,Pfkp,Pkm,Prkcg,Prps1,Rab7,Rac1,Rap2b,Rapgef2,Rhob,Sept3,Sept5,Sept6,Sept7,Snrnp200,Suclg1,Syn2,Syn3,Trio,Tuba4a,Tuba8,…
GO:0032555	purine ribonucleotide binding	69	1766	7.18e-16	Acly,Actr3,Adssl1,Afg3l2,Arl3,Ass1,Atl3,Atp1a2,Atp1a3,Atp1b1,Atp2a2,Atp2b1,Atp2b2,Atp6v1b2,Atp8a2,Camkv,Cct3,Cct7,Cdc42,Chordc1,Ckmt1,Dnaja2,Dnm1,Dync1h1,Eef1a1,Eef1a2,Glud1,Gnai2,Gnao1,Gnaz,Hk1,Hsp90ab1,Hspa1b,Hspa4,Hspa4l,Hspa8,Hsph1,Idh3g,Itpka,Nsf,Ntrk2,Pcca,Pebp1,Pfkl,Pfkp,Pkm,Prkcg,Prps1,Rab7,Rac1,Rap2b,Rapgef2,Rhob,Sept3,Sept5,Sept6,Sept7,Snrnp200,Suclg1,Syn2,Syn3,Trio,Tuba4a,Tuba8,Tubb3,U…
GO:0035639	purine ribonucleoside triphosphate binding	67	1697	1.23e-15	Acly,Actr3,Adssl1,Afg3l2,Arl3,Ass1,Atl3,Atp1a2,Atp1a3,Atp1b1,Atp2a2,Atp2b1,Atp2b2,Atp6v1b2,Atp8a2,Camkv,Cct3,Cct7,Cdc42,Chordc1,Ckmt1,Dnaja2,Dnm1,Dync1h1,Eef1a1,Eef1a2,Glud1,Gnai2,Gnao1,Gnaz,Hk1,Hsp90ab1,Hspa1b,Hspa4,Hspa4l,Hspa8,Hsph1,Idh3g,Itpka,Nsf,Ntrk2,Pcca,Pebp1,Pfkl,Pfkp,Pkm,Prkcg,Prps1,Rab7,Rac1,Rap2b,Rhob,Sept3,Sept5,Sept6,Sept7,Snrnp200,Syn2,Syn3,Trio,Tuba4a,Tuba8,Tubb3,Uba1,Ube2m,Vars,…
GO:0043167	ion binding	127	5302	2.5e-14	Abat,Acly,Actn1,Actr3,Adh5,Adssl1,Afg3l2,Aldh5a1,Ap2a2,Arl3,Ass1,Atl3,Atp1a2,Atp1a3,Atp1b1,Atp2a2,Atp2b1,Atp2b2,Atp6v1b2,Atp8a2,Cadps,Camkv,Capn2,Cbr3,Cct3,Cct7,Cdc42,Cfl1,Chordc1,Cisd1,Ckmt1,Cpne6,Csrp1,Ddah1,Dld,Dnaja2,Dnm1,Dpysl3,Dync1h1,Eea1,Eef1a1,Eef1a2,Etfa,Fah,Fahd2a,Fasn,Gad2,Glrx5,Glud1,Gnai2,Gnao1,Gnaz,Got2,Gstm5,Hk1,Hpca,Hpx,Hsp90ab1,Hspa1b,Hspa4,Hspa4l,Hspa8,Hsph1,Idh3g,Itpka,L1cam,L…
GO:0017111	nucleoside-triphosphatase activity	41	714	4.32e-14	Adssl1,Arl3,Atl3,Atp1a2,Atp1a3,Atp1b1,Atp1b2,Atp1b3,Atp2a2,Atp2b1,Atp2b2,Atp5e,Atp5o,Atp6v1c1,Atp8a2,Cdc42,Dctn1,Dnm1,Dync1h1,Dynll1,Dynll2,Eef1a1,Eef1a2,Gm10221,Gnai2,Gnao1,Gnaz,Gng3,Hspa8,Nsf,Pfn2,Pin1,Rab7,Rac1,Rap2b,Rhob,Snrnp200,Tuba4a,Tuba8,Tubb3,Vcp
GO:0016462	pyrophosphatase activity	42	753	4.5e-14	Adssl1,Arl3,Atl3,Atp1a2,Atp1a3,Atp1b1,Atp1b2,Atp1b3,Atp2a2,Atp2b1,Atp2b2,Atp5e,Atp5o,Atp6v1c1,Atp8a2,Cdc42,Dctn1,Dnm1,Dync1h1,Dynll1,Dynll2,Eef1a1,Eef1a2,Gm10221,Gnai2,Gnao1,Gnaz,Gng3,Hspa8,Nsf,Nudt3,Pfn2,Pin1,Rab7,Rac1,Rap2b,Rhob,Snrnp200,Tuba4a,Tuba8,Tubb3,Vcp
GO:0016787	hydrolase activity	72	2259	1.97e-12	Adam22,Adssl1,Afg3l2,Arl3,Atl3,Atp1a2,Atp1a3,Atp1b1,Atp1b2,Atp1b3,Atp2a2,Atp2b1,Atp2b2,Atp5e,Atp5o,Atp6v1b2,Atp6v1c1,Atp8a2,Blmh,Capn2,Cdc42,Cnp,Ctsb,Ctsd,Dctn1,Ddah1,Dnajc6,Dnm1,Dpysl2,Dpysl3,Dync1h1,Dynll1,Dynll2,Eef1a1,Eef1a2,Eif3f,Fah,Fahd2a,Fasn,Gm10221,Gnai2,Gnao1,Gnaz,Gng3,Hint1,Hspa8,Nsf,Nudt3,Park7,Pfn2,Pgam1,Pgp,Pin1,Ppp1cb,Ppp2ca,Ppp2r1a,Ppp3r1,Psma5,Rab7,Rac1,Rap2b,Rhob,Sh3bp1,Snrnp20…
GO:0019899	enzyme binding	67	2175	8.64e-11	Abat,Actr3,Aldoa,Ap1g1,Ap2a1,Ap2a2,Atp1b1,Atp1b2,Atp1b3,Atp2a2,Cadps,Cdc42,Cfl1,Cltc,Cst3,Dctn1,Dmxl2,Dnm1,Dpysl2,Dynll1,Eef1a1,Eef1a2,Elmo2,Gdi1,Gdi2,Gfap,Glud1,Got2,Gstm5,Hpca,Hsp90ab1,Hspa8,Itpka,Kpnb1,Mag,Mapre3,Nsf,Ntrk2,P4hb,Park7,Pcbp2,Pcca,Pebp1,Pfkl,Pgam1,Pin1,Ppp1cb,Ppp2ca,Ppp3r1,Rab7,Rac1,Rapgef2,Rims1,Rpl23,Serpinb6a,Sipa1l1,Slc25a5,Tpi1,Trim28,Trio,Tuba4a,Ube2v2,Uchl1,Uqcrc1,Vcan,Vcp…
GO:0008144	drug binding	56	1630	1.41e-10	Abat,Acly,Actr3,Afg3l2,Ass1,Atp1a2,Atp1a3,Atp1b1,Atp2a2,Atp2b1,Atp2b2,Atp5o,Atp6v1b2,Atp8a2,Camkv,Cct3,Cct7,Chordc1,Ckmt1,Dnaja2,Dync1h1,Eef1a1,Fasn,Fscn1,Gad2,Glud1,Got2,Hk1,Hsp90ab1,Hspa1b,Hspa4,Hspa4l,Hspa8,Hsph1,Idh3g,Itpka,Nsf,Ntrk2,Oat,Pcca,Pebp1,Pfkl,Pfkp,Pkm,Ppp3r1,Prkcg,Prosc,Prps1,Snrnp200,Syn2,Syn3,Trio,Uba1,Ube2m,Vars,Vcp
GO:0032550	purine ribonucleoside binding	25	343	1.51e-10	Adssl1,Arl3,Atl3,Cdc42,Dnm1,Eef1a1,Eef1a2,Glud1,Gnai2,Gnao1,Gnaz,Hsp90ab1,Prps1,Rab7,Rac1,Rap2b,Rhob,Sept3,Sept5,Sept6,Sept7,Suclg1,Tuba4a,Tuba8,Tubb3
GO:0097159	organic cyclic compound binding	110	4818	1.51e-10	Abat,Acly,Actn1,Actr3,Adssl1,Afg3l2,Aldh5a1,Arl3,Ass1,Atl3,Atp1a2,Atp1a3,Atp1b1,Atp2a2,Atp2b1,Atp2b2,Atp5o,Atp6v1b2,Atp8a2,Camkv,Cbr3,Cct3,Cct7,Cdc42,Celf4,Chordc1,Ckmt1,Cltc,Cnp,Ctbp1,Dld,Dnaja2,Dnm1,Dync1h1,Eea1,Eef1a1,Eef1a2,Eef1g,Eif3c,Eif3f,Etfa,Fasn,Gad2,Glud1,Gnai2,Gnao1,Gnaz,Got2,Gpd1,Gpd1l,Hdlbp,Hint1,Hk1,Hnrnpl,Hpx,Hsp90ab1,Hspa1b,Hspa4,Hspa4l,Hspa8,Hsph1,Idh3g,Itpka,Khsrp,Ndufv1,Nsf,Nt…
GO:1901363	heterocyclic compound binding	109	4748	1.51e-10	Abat,Acly,Actn1,Actr3,Adssl1,Afg3l2,Aldh5a1,Arl3,Ass1,Atl3,Atp1a2,Atp1a3,Atp1b1,Atp2a2,Atp2b1,Atp2b2,Atp6v1b2,Atp8a2,Camkv,Cbr3,Cct3,Cct7,Cdc42,Celf4,Chordc1,Ckmt1,Cltc,Cnp,Ctbp1,Dld,Dnaja2,Dnm1,Dync1h1,Eea1,Eef1a1,Eef1a2,Eef1g,Eif3c,Eif3f,Etfa,Fasn,Gad2,Glud1,Gnai2,Gnao1,Gnaz,Got2,Gpd1,Gpd1l,Hdlbp,Hint1,Hk1,Hnrnpl,Hpx,Hsp90ab1,Hspa1b,Hspa4,Hspa4l,Hspa8,Hsph1,Idh3g,Itpka,Khsrp,Ndufv1,Nsf,Ntrk2,Oa…
GO:0042802	identical protein binding	59	1798	1.68e-10	Abat,Actn1,Adh5,Adssl1,Aldoa,Ass1,Atl3,Blmh,C1qb,Cadm1,Cadm2,Cadm4,Cct7,Cisd1,Ckmt1,Coro1a,Cst3,Ctbp1,Dctn1,Dlat,Dnm1,Dpysl2,Dynll1,Dynll2,Eea1,Fasn,Gfap,Got2,Gpd1,Gpd1l,Gstm5,Hk1,Hpca,Hsp90ab1,L1cam,Mag,Mapre3,Mdh2,Necab2,Ntrk2,Oat,Olfml2a,Park7,Pfkl,Pfkp,Pkm,Plp1,Prps1,Psmd4,Qdpr,Sept3,Sept5,Sept7,Sh3bp1,Snrnp200,Tardbp,Vcp,Ywhag,Ywhaq
GO:0008092	cytoskeletal protein binding	39	877	2.56e-10	Actn1,Actr3,Adssl1,Aldoa,Ap1g1,Arl3,Arpc1a,Capn2,Capzb,Cfl1,Cfl2,Cltc,Coro1a,Dctn1,Dnm1,Dpysl2,Dpysl3,Dstn,Dynll1,Dynll2,Fscn1,Hpca,Hsp90ab1,Hsph1,Kbp,Kpnb1,Mapre3,Ncald,Pfn2,Ppp2ca,Sipa1l1,Slc8a1,Synpo,Tagln3,Tmsb4x,Tppp3,Tpt1,Vbp1,Ywhag
GO:0032561	guanyl ribonucleotide binding	25	359	2.77e-10	Adssl1,Arl3,Atl3,Cdc42,Dnm1,Eef1a1,Eef1a2,Glud1,Gnai2,Gnao1,Gnaz,Hsp90ab1,Prps1,Rab7,Rac1,Rap2b,Rhob,Sept3,Sept5,Sept6,Sept7,Suclg1,Tuba4a,Tuba8,Tubb3
GO:0015662	ATPase activity, coupled to transmembrane movement of ions, phosphorylative mechanism	11	42	8.34e-10	Atp1a2,Atp1a3,Atp1b1,Atp1b2,Atp1b3,Atp2a2,Atp2b1,Atp2b2,Atp5e,Atp6v1c1,Gm10221
GO:0019829	cation-transporting ATPase activity	12	59	1.31e-09	Atp1a2,Atp1a3,Atp1b1,Atp1b2,Atp1b3,Atp2a2,Atp2b1,Atp2b2,Atp5e,Atp5o,Atp6v1c1,Gm10221
GO:0005525	GTP binding	23	338	2.45e-09	Adssl1,Arl3,Atl3,Cdc42,Dnm1,Eef1a1,Eef1a2,Glud1,Gnai2,Gnao1,Gnaz,Hsp90ab1,Rab7,Rac1,Rap2b,Rhob,Sept3,Sept5,Sept6,Sept7,Tuba4a,Tuba8,Tubb3
GO:0044877	protein-containing complex binding	42	1094	2.45e-09	Actn1,Actr3,Adssl1,Ap1g1,Ap2a1,Ap2a2,Ap2b1,Arpc1a,Atp5o,Cd9,Cfl1,Cfl2,Coro1a,Ctsb,Dctn1,Dnm1,Dstn,Eif3c,Fis1,Fscn1,Gfap,Gnai2,Gnao1,Gnaz,Hk1,Hspa4,Icam5,Kpnb1,L1cam,Nsf,P4hb,Pfkp,Ppp2ca,Pzp,Rab7,Sipa1l1,Slc25a3,Tagln3,Uqcrc1,Uqcrh,Usp14,Vcp
GO:0016491	oxidoreductase activity	32	700	8.51e-09	Acaa1a,Adh5,Aldh5a1,Cbr1,Cbr3,Ctbp1,Dlat,Dld,Etfa,Fasn,Gfod1,Glrx5,Glud1,Gpd1,Gpd1l,Idh3g,Kcnab2,Mdh2,Ndufb7,Ndufb8,Ndufs8,Ndufv1,Ogdh,P4hb,Park7,Pdha1,Prdx5,Qdpr,Sdha,Selenbp1,Uqcrh,Vat1
GO:0048037	cofactor binding	26	493	2.44e-08	Abat,Acly,Aldh5a1,Cbr3,Cisd1,Ctbp1,Dld,Etfa,Fasn,Gad2,Glrx5,Glud1,Got2,Gpd1,Gpd1l,Gstm5,Hpx,Idh3g,Ndufs8,Ndufv1,Oat,Ogdh,Prosc,Qdpr,Sdha,Suclg1
GO:0005524	ATP binding	46	1389	2.71e-08	Acly,Actr3,Afg3l2,Ass1,Atp1a2,Atp1a3,Atp1b1,Atp2a2,Atp2b1,Atp2b2,Atp6v1b2,Atp8a2,Camkv,Cct3,Cct7,Chordc1,Ckmt1,Dnaja2,Dync1h1,Glud1,Hk1,Hsp90ab1,Hspa1b,Hspa4,Hspa4l,Hspa8,Hsph1,Idh3g,Itpka,Nsf,Ntrk2,Pcca,Pebp1,Pfkl,Pfkp,Pkm,Prkcg,Prps1,Snrnp200,Syn2,Syn3,Trio,Uba1,Ube2m,Vars,Vcp
GO:0019900	kinase binding	32	737	2.71e-08	Ap2a1,Ap2a2,Atp1b1,Cadps,Cdc42,Cltc,Dctn1,Dnm1,Dpysl2,Eef1a1,Eef1a2,Elmo2,Gfap,Hpca,Hsp90ab1,Mag,Mapre3,Nsf,Ntrk2,Park7,Pebp1,Pfkl,Pgam1,Pin1,Ppp1cb,Ppp2ca,Rac1,Rapgef2,Rims1,Sipa1l1,Tuba4a,Ywhag
GO:0032559	adenyl ribonucleotide binding	47	1449	3.16e-08	Acly,Actr3,Afg3l2,Ass1,Atp1a2,Atp1a3,Atp1b1,Atp2a2,Atp2b1,Atp2b2,Atp6v1b2,Atp8a2,Camkv,Cct3,Cct7,Chordc1,Ckmt1,Dnaja2,Dync1h1,Glud1,Hk1,Hsp90ab1,Hspa1b,Hspa4,Hspa4l,Hspa8,Hsph1,Idh3g,Itpka,Nsf,Ntrk2,Pcca,Pebp1,Pfkl,Pfkp,Pkm,Prkcg,Prps1,Rapgef2,Snrnp200,Syn2,Syn3,Trio,Uba1,Ube2m,Vars,Vcp
GO:0019904	protein domain specific binding	32	775	7.94e-08	Actn1,Ap2a2,Ap2m1,Atp2b1,Atp2b2,Cadm1,Cltc,Cntnap1,Ctbp1,Dnajc6,Dnm1,Dpysl3,Dynll1,Elmo2,Gria3,Hsp90ab1,Hspa8,Kpnb1,L1cam,Nfasc,Nsf,Ppp2ca,Ppp3r1,Rap2b,Rapgef2,Rims1,Sh3bp1,Sirpa,Trim28,Vcp,Ywhag,Ywhaq
GO:0050662	coenzyme binding	19	283	1.05e-07	Abat,Aldh5a1,Cbr3,Ctbp1,Dld,Etfa,Fasn,Gad2,Glud1,Got2,Gpd1,Gpd1l,Idh3g,Ndufv1,Oat,Ogdh,Prosc,Qdpr,Sdha
GO:0043492	ATPase activity, coupled to movement of substances	13	116	1.08e-07	Atp1a2,Atp1a3,Atp1b1,Atp1b2,Atp1b3,Atp2a2,Atp2b1,Atp2b2,Atp5e,Atp5o,Atp6v1c1,Atp8a2,Gm10221
GO:0003924	GTPase activity	18	255	1.23e-07	Adssl1,Arl3,Atl3,Cdc42,Dnm1,Eef1a1,Eef1a2,Gnai2,Gnao1,Gnaz,Gng3,Rab7,Rac1,Rap2b,Rhob,Tuba4a,Tuba8,Tubb3
GO:0019901	protein kinase binding	28	659	3.96e-07	Ap2a1,Ap2a2,Atp1b1,Cadps,Cdc42,Cltc,Dctn1,Dnm1,Dpysl2,Eef1a1,Eef1a2,Elmo2,Hsp90ab1,Mag,Mapre3,Nsf,Ntrk2,Pebp1,Pgam1,Pin1,Ppp1cb,Ppp2ca,Rac1,Rapgef2,Rims1,Sipa1l1,Tuba4a,Ywhag
GO:0008022	protein C-terminus binding	15	224	3.87e-06	Ap1g1,Ap2a1,Atp1b1,Atp2a2,Atp2b2,Cltc,Coro1a,Dnm1,Dynll1,Mapre3,Nsf,Pabpc1,Ppp2ca,Stip1,Ywhaq
GO:0022804	active transmembrane transporter activity	18	329	4.16e-06	Atp1a2,Atp1a3,Atp1b1,Atp1b2,Atp1b3,Atp2a2,Atp2b1,Atp2b2,Atp5e,Atp5o,Atp6v1c1,Gm10221,Slc1a2,Slc25a3,Slc25a5,Slc32a1,Slc6a17,Slc8a1
GO:0046983	protein dimerization activity	40	1343	4.27e-06	Abat,Actn1,Adh5,Adssl1,C1qb,Cadm1,Cadm2,Cadm4,Capn2,Ckmt1,Coro1a,Ctbp1,Dnm1,Dynll1,Dynll2,Eea1,Fasn,Gad2,Got2,Gpd1,Gpd1l,Gstm5,Hk1,Hsp90ab1,Mag,Mdh2,Ntrk2,Olfml2a,P4hb,Park7,Ppp2ca,Ppp2r1a,Prdx5,Prps1,Qdpr,Sept5,Sept7,Sh3bp1,Suclg1,Syn2
GO:0051287	NAD binding	9	66	4.48e-06	Aldh5a1,Ctbp1,Dld,Glud1,Gpd1,Gpd1l,Idh3g,Ndufv1,Qdpr
GO:0005102	signaling receptor binding	43	1515	4.98e-06	Actn1,Anks1b,Ap2a1,Ap2m1,Atp1a3,Atp2a2,Atp2b2,Cadm1,Cadm2,Cadm4,Cd9,Cfl1,Cltc,Dnm1,Elmo2,Fis1,Gfap,Gnai2,Gnao1,Gnaz,Gng3,Hsp90ab1,Hspa8,Icam5,L1cam,Lgi1,Mag,Necab2,Nsf,Ntrk2,P4hb,Park7,Pebp1,Ppp2ca,Prdx5,Rapgef2,Sh3bp1,Sipa1l1,Slc30a9,Trf,Uchl1,Vcp,Ywhag
GO:0016887	ATPase activity	19	372	4.98e-06	Atp1a2,Atp1a3,Atp1b1,Atp1b2,Atp1b3,Atp2a2,Atp2b1,Atp2b2,Atp5e,Atp5o,Atp6v1c1,Atp8a2,Dync1h1,Gm10221,Hspa8,Nsf,Pfn2,Snrnp200,Vcp
GO:0042623	ATPase activity, coupled	17	301	5.38e-06	Atp1a2,Atp1a3,Atp1b1,Atp1b2,Atp1b3,Atp2a2,Atp2b1,Atp2b2,Atp5e,Atp5o,Atp6v1c1,Atp8a2,Dync1h1,Gm10221,Hspa8,Nsf,Snrnp200
GO:0042803	protein homodimerization activity	30	868	7.62e-06	Abat,Actn1,Adh5,Adssl1,C1qb,Cadm1,Cadm2,Cadm4,Ckmt1,Coro1a,Ctbp1,Dynll1,Dynll2,Eea1,Fasn,Got2,Gpd1,Gpd1l,Gstm5,Hk1,Hsp90ab1,Mag,Mdh2,Ntrk2,Olfml2a,Park7,Prps1,Qdpr,Sept5,Sh3bp1
GO:0005391	sodium:potassium-exchanging ATPase activity	5	11	1.3e-05	Atp1a2,Atp1a3,Atp1b1,Atp1b2,Atp1b3
GO:0016616	oxidoreductase activity, acting on the CH-OH group of donors, NAD or NADP as acceptor	10	114	3.61e-05	Adh5,Cbr1,Cbr3,Ctbp1,Fasn,Gpd1,Gpd1l,Idh3g,Kcnab2,Mdh2
GO:0003779	actin binding	18	397	4.51e-05	Actn1,Actr3,Adssl1,Arpc1a,Capzb,Cfl1,Cfl2,Coro1a,Dstn,Fscn1,Hpca,Ncald,Pfn2,Sipa1l1,Synpo,Tagln3,Tmsb4x,Ywhag
GO:0033218	amide binding	16	337	8.99e-05	Ap2m1,Atp1a3,Cltc,Cst3,Ctsb,Ctsd,Dld,Fasn,Gria3,Gstm5,Hsp90ab1,Hspa8,Kpnb1,Mag,Ppp3r1,Tubb3
GO:0051015	actin filament binding	11	163	0.00011	Actn1,Actr3,Adssl1,Arpc1a,Cfl1,Cfl2,Coro1a,Dstn,Fscn1,Sipa1l1,Tagln3
GO:0022890	inorganic cation transmembrane transporter activity	20	524	0.00014	Atp1a2,Atp1a3,Atp1b1,Atp1b2,Atp1b3,Atp2a2,Atp2b1,Atp2b2,Atp5e,Atp5o,Atp6v1c1,Gm10221,Gria3,Kcnab2,Scn2b,Slc1a2,Slc32a1,Slc6a17,Slc8a1,Trf
GO:0008324	cation transmembrane transporter activity	21	571	0.00015	Atp1a2,Atp1a3,Atp1b1,Atp1b2,Atp1b3,Atp2a2,Atp2b1,Atp2b2,Atp5e,Atp5o,Atp6v1c1,Gm10221,Gria3,Kcnab2,Scn2b,Slc1a2,Slc30a9,Slc32a1,Slc6a17,Slc8a1,Trf
GO:0043531	ADP binding	6	37	0.00015	Chordc1,Glud1,Hspa8,Pkm,Prps1,Vcp
GO:0016620	oxidoreductase activity, acting on the aldehyde or oxo group of donors, NAD or NADP as acceptor	6	39	0.00019	Adh5,Aldh5a1,Dlat,Dld,Ogdh,Pdha1
GO:0019003	GDP binding	7	62	0.00023	Arl3,Prps1,Rab7,Rap2b,Rhob,Sept5,Suclg1
GO:0015077	monovalent inorganic cation transmembrane transporter activity	15	329	0.00024	Atp1a2,Atp1a3,Atp1b1,Atp1b2,Atp1b3,Atp5e,Atp5o,Atp6v1c1,Gm10221,Kcnab2,Scn2b,Slc1a2,Slc32a1,Slc6a17,Slc8a1
GO:0044325	ion channel binding	9	125	0.00042	Actn1,Ap2m1,Gpd1l,Hsp90ab1,Kcnab2,Ppp2ca,Rims1,Slc8a1,Ywhaq
GO:0031072	heat shock protein binding	9	128	0.00049	Chordc1,Cltc,Dnaja2,Hsp90ab1,Hspa8,Kpnb1,Ogdh,Sh3bp1,Stip1
GO:0031406	carboxylic acid binding	11	198	0.00055	Adh5,Aldh5a1,Ass1,Ddah1,Gad2,Glud1,Got2,Hspa8,L1cam,Mag,Vcan
GO:0001664	G protein-coupled receptor binding	13	277	0.00061	Atp1a3,Atp2a2,Dnm1,Gnai2,Gnao1,Gnaz,Gng3,Hspa8,Necab2,Nsf,Ppp2ca,Rapgef2,Uchl1
GO:0042277	peptide binding	13	280	0.00065	Ap2m1,Atp1a3,Cltc,Cst3,Ctsb,Ctsd,Gria3,Gstm5,Hsp90ab1,Hspa8,Kpnb1,Ppp3r1,Tubb3
GO:0015081	sodium ion transmembrane transporter activity	9	138	0.00078	Atp1a2,Atp1a3,Atp1b1,Atp1b2,Atp1b3,Scn2b,Slc1a2,Slc6a17,Slc8a1
GO:0060590	ATPase regulator activity	5	33	0.00089	Atp1b1,Atp1b2,Atp1b3,Dnaja2,Hsph1
GO:0034604	pyruvate dehydrogenase (NAD+) activity	3	5	0.0009	Dlat,Dld,Pdha1
GO:0015075	ion transmembrane transporter activity	23	774	0.0011	Atp1a2,Atp1a3,Atp1b1,Atp1b2,Atp1b3,Atp2a2,Atp2b1,Atp2b2,Atp5e,Atp5o,Atp6v1c1,Gm10221,Gria3,Kcnab2,Scn2b,Slc1a2,Slc25a3,Slc25a5,Slc30a9,Slc32a1,Slc6a17,Slc8a1,Trf
GO:0016655	oxidoreductase activity, acting on NAD(P)H, quinone or similar compound as acceptor	5	36	0.0012	Cbr1,Ndufb7,Ndufb8,Ndufs8,Ndufv1
GO:0030165	PDZ domain binding	8	118	0.0014	Atp2b1,Atp2b2,Cadm1,Ctbp1,Gria3,L1cam,Nsf,Rapgef2
GO:0030234	enzyme regulator activity	25	894	0.0014	Atp1b1,Atp1b2,Atp1b3,Cst3,Dnaja2,Dynll1,Gdi1,Gdi2,Hsp90ab1,Hsph1,Lxn,Park7,Pebp1,Ppp2r1a,Prdx5,Pzp,Rapgef2,Rnh1,Rpl23,Serpinb6a,Sh3bp1,Sipa1l1,Smap2,Usp14,Vcp
GO:0005215	transporter activity	28	1067	0.0015	Ap2s1,Atp1a2,Atp1a3,Atp1b1,Atp1b2,Atp1b3,Atp2a2,Atp2b1,Atp2b2,Atp5e,Atp5o,Atp6v1c1,Atp8a2,Cplx1,Gm10221,Gria3,Hpx,Kcnab2,Kpnb1,Scn2b,Slc1a2,Slc25a3,Slc25a5,Slc30a9,Slc32a1,Slc6a17,Slc8a1,Trf
GO:0001671	ATPase activator activity	4	21	0.0019	Atp1b1,Atp1b2,Atp1b3,Dnaja2
GO:0017124	SH3 domain binding	8	128	0.0023	Cntnap1,Dnajc6,Dnm1,Dpysl3,Elmo2,Rims1,Sh3bp1,Sirpa
GO:0015318	inorganic molecular entity transmembrane transporter activity	21	728	0.0029	Atp1a2,Atp1a3,Atp1b1,Atp1b2,Atp1b3,Atp2a2,Atp2b1,Atp2b2,Atp5e,Atp5o,Atp6v1c1,Gm10221,Gria3,Kcnab2,Scn2b,Slc1a2,Slc25a3,Slc32a1,Slc6a17,Slc8a1,Trf
GO:0030742	GTP-dependent protein binding	4	24	0.0029	Ap1g1,Cdc42,Eea1,Rac1
GO:0008137	NADH dehydrogenase (ubiquinone) activity	4	26	0.0038	Ndufb7,Ndufb8,Ndufs8,Ndufv1
GO:0030170	pyridoxal phosphate binding	5	51	0.0048	Abat,Gad2,Got2,Oat,Prosc
GO:0046873	metal ion transmembrane transporter activity	14	403	0.005	Atp1a2,Atp1a3,Atp1b1,Atp1b2,Atp1b3,Atp2a2,Atp2b1,Atp2b2,Kcnab2,Scn2b,Slc1a2,Slc6a17,Slc8a1,Trf
GO:0022857	transmembrane transporter activity	24	933	0.0052	Atp1a2,Atp1a3,Atp1b1,Atp1b2,Atp1b3,Atp2a2,Atp2b1,Atp2b2,Atp5e,Atp5o,Atp6v1c1,Gm10221,Gria3,Hpx,Kcnab2,Scn2b,Slc1a2,Slc25a3,Slc25a5,Slc30a9,Slc32a1,Slc6a17,Slc8a1,Trf
GO:0016651	oxidoreductase activity, acting on NAD(P)H	6	82	0.0055	Cbr1,Dld,Ndufb7,Ndufb8,Ndufs8,Ndufv1
GO:0031625	ubiquitin protein ligase binding	12	316	0.0055	Hsp90ab1,Hspa8,Pcbp2,Rpl23,Sipa1l1,Slc25a5,Tpi1,Trim28,Ube2v2,Uchl1,Uqcrc1,Vcp
GO:0060589	nucleoside-triphosphatase regulator activity	11	274	0.0058	Atp1b1,Atp1b2,Atp1b3,Dnaja2,Gdi1,Gdi2,Hsph1,Rapgef2,Sh3bp1,Sipa1l1,Smap2
GO:0005093	Rab GDP-dissociation inhibitor activity	2	2	0.0065	Gdi1,Gdi2
GO:0016418	S-acetyltransferase activity	2	2	0.0065	Dlat,Fasn
GO:0005388	calcium-transporting ATPase activity	3	14	0.0077	Atp2a2,Atp2b1,Atp2b2
GO:0008553	proton-exporting ATPase activity, phosphorylative mechanism	3	14	0.0077	Atp5e,Atp6v1c1,Gm10221
GO:0030955	potassium ion binding	3	14	0.0077	Atp1a2,Atp1b1,Pkm
GO:0046872	metal ion binding	62	3430	0.0077	Abat,Acly,Actn1,Adh5,Adssl1,Afg3l2,Arl3,Atp1a2,Atp1a3,Atp1b1,Atp2a2,Atp2b1,Atp2b2,Atp8a2,Cadps,Capn2,Chordc1,Cisd1,Csrp1,Ddah1,Dnaja2,Eea1,Fah,Fahd2a,Glrx5,Gnai2,Gnao1,Gnaz,Hpca,Hpx,Idh3g,Mpi,N28178,Ncald,Ndufs8,Ndufv1,Necab2,Nsf,Nudt3,Ogdh,Park7,Pcca,Pfkl,Pfkp,Pgp,Pkm,Ppp1cb,Ppp2ca,Ppp3r1,Prkcg,Prps1,Rims1,Sh3bp1,Slc1a2,Slc8a1,Smap2,Tpt1,Trf,Trim28,Uqcrc1,Vat1,Vcan
GO:0070402	NADPH binding	3	14	0.0077	Cbr3,Fasn,Qdpr
GO:0003729	mRNA binding	9	202	0.0079	Celf4,Eef1a1,Hnrnpl,Khsrp,Pabpc1,Park7,Ptbp2,Ssb,Tardbp
GO:0097718	disordered domain specific binding	4	34	0.0079	Ap2a2,Ap2m1,Cltc,Hsp90ab1
GO:0043169	cation binding	63	3516	0.0082	Abat,Acly,Actn1,Adh5,Adssl1,Afg3l2,Arl3,Atp1a2,Atp1a3,Atp1b1,Atp2a2,Atp2b1,Atp2b2,Atp8a2,Cadps,Capn2,Chordc1,Cisd1,Csrp1,Ddah1,Dnaja2,Eea1,Fah,Fahd2a,Glrx5,Glud1,Gnai2,Gnao1,Gnaz,Hpca,Hpx,Idh3g,Mpi,N28178,Ncald,Ndufs8,Ndufv1,Necab2,Nsf,Nudt3,Ogdh,Park7,Pcca,Pfkl,Pfkp,Pgp,Pkm,Ppp1cb,Ppp2ca,Ppp3r1,Prkcg,Prps1,Rims1,Sh3bp1,Slc1a2,Slc8a1,Smap2,Tpt1,Trf,Trim28,Uqcrc1,Vat1,Vcan
GO:0003746	translation elongation factor activity	3	15	0.0085	Eef1a1,Eef1a2,Eef1g
GO:0030276	clathrin binding	5	62	0.0089	Ap2a1,Ap2a2,Ap2b1,Cltc,Ncald
GO:0050839	cell adhesion molecule binding	9	207	0.009	Actn1,Cadm1,Cadm2,Cadm4,Cd9,Gfap,Icam5,L1cam,P4hb
GO:0051087	chaperone binding	6	94	0.0092	Atp1a2,Atp1a3,Dnaja2,Hspa8,Ogdh,Stip1
GO:0003872	6-phosphofructokinase activity	2	3	0.0093	Pfkl,Pfkp
GO:0004367	glycerol-3-phosphate dehydrogenase [NAD+] activity	2	3	0.0093	Gpd1,Gpd1l
GO:0019842	vitamin binding	7	130	0.0093	Abat,Fasn,Gad2,Got2,Oat,Ogdh,Prosc
GO:0051536	iron-sulfur cluster binding	5	63	0.0093	Abat,Cisd1,Glrx5,Ndufs8,Ndufv1
GO:1990381	ubiquitin-specific protease binding	3	16	0.0093	Cltc,Park7,Vcp
GO:0009055	electron transfer activity	5	65	0.0101	Dld,Etfa,Glrx5,Sdha,Uqcrh
GO:0005200	structural constituent of cytoskeleton	5	67	0.0113	Actr3,Gfap,Tuba4a,Tuba8,Tubb3
GO:0016597	amino acid binding	5	68	0.0119	Ass1,Ddah1,Gad2,Glud1,Got2
GO:0004090	carbonyl reductase (NADPH) activity	2	4	0.013	Cbr1,Cbr3
GO:0019200	carbohydrate kinase activity	3	20	0.0158	Hk1,Pfkl,Pfkp
GO:0016874	ligase activity	7	148	0.0174	Adssl1,Ass1,Pcca,Suclg1,Uba1,Uchl1,Vars
GO:0046912	transferase activity, transferring acyl groups, acyl groups converted into alkyl on transfer	2	5	0.0176	Acly,Cs
GO:0048403	brain-derived neurotrophic factor binding	2	5	0.0176	Ntrk2,Pzp
GO:0051022	Rho GDP-dissociation inhibitor binding	2	5	0.0176	Cdc42,Rac1
GO:0070061	fructose binding	2	5	0.0176	Aldoa,Pfkl
GO:0070095	fructose-6-phosphate binding	2	5	0.0176	Pfkl,Pfkp
GO:0098519	nucleotide phosphatase activity, acting on free nucleotides	2	5	0.0176	Pgp,Sh3bp1
GO:0008135	translation factor activity, RNA binding	5	77	0.0184	Eef1a1,Eef1a2,Eef1g,Eif3c,Eif3f
GO:0051082	unfolded protein binding	5	77	0.0184	Cct3,Cct7,Dnaja2,Hsp90ab1,Hspa8
GO:0008483	transaminase activity	3	22	0.0187	Abat,Got2,Oat
GO:0031690	adrenergic receptor binding	3	22	0.0187	Ppp2ca,Rapgef2,Uchl1
GO:0045505	dynein intermediate chain binding	3	22	0.0187	Dync1h1,Dynll1,Dynll2
GO:0005178	integrin binding	6	114	0.0191	Actn1,Cd9,Gfap,Icam5,L1cam,P4hb
GO:0008289	lipid binding	17	652	0.0191	Adh5,Ap2a2,Ap2m1,Atp1a2,Atp5o,Cadps,Cfl1,Cpne6,Eea1,Got2,Hspa8,Mag,Pebp1,Pfn2,Rapgef2,Sept5,Vcp
GO:0015631	tubulin binding	11	336	0.0195	Arl3,Capzb,Dctn1,Dnm1,Dpysl2,Hsph1,Mapre3,Ncald,Tppp3,Tpt1,Vbp1
GO:0003785	actin monomer binding	3	23	0.02	Coro1a,Pfn2,Tmsb4x
GO:0004721	phosphoprotein phosphatase activity	7	156	0.02	Dnajc6,Pgp,Ppp1cb,Ppp2ca,Ppp2r1a,Ppp3r1,Sh3bp1
GO:0031267	small GTPase binding	12	388	0.02	Ap1g1,Dmxl2,Gdi1,Gdi2,Itpka,Kpnb1,Nsf,Rab7,Rac1,Rapgef2,Rims1,Trio
GO:0051959	dynein light intermediate chain binding	3	23	0.02	Dync1h1,Dynll1,Dynll2
GO:0005326	neurotransmitter transporter activity	4	50	0.0213	Cplx1,Slc1a2,Slc32a1,Slc6a17
GO:0031683	G-protein beta/gamma-subunit complex binding	3	25	0.0233	Gnai2,Gnao1,Gnaz
GO:0050780	dopamine receptor binding	3	25	0.0233	Atp1a3,Dnm1,Nsf
GO:0061134	peptidase regulator activity	8	207	0.0244	Cst3,Lxn,Pebp1,Prdx5,Pzp,Serpinb6a,Usp14,Vcp
GO:0016624	oxidoreductase activity, acting on the aldehyde or oxo group of donors, disulfide as acceptor	2	7	0.0247	Ogdh,Pdha1
GO:0031685	adenosine receptor binding	2	7	0.0247	Hspa8,Necab2
GO:0031821	G protein-coupled serotonin receptor binding	2	7	0.0247	Gnao1,Gnaz
GO:0004866	endopeptidase inhibitor activity	7	166	0.0258	Cst3,Lxn,Pebp1,Prdx5,Pzp,Serpinb6a,Usp14
GO:0044769	ATPase activity, coupled to transmembrane movement of ions, rotational mechanism	3	27	0.0272	Atp5e,Atp5o,Atp6v1c1
GO:0008047	enzyme activator activity	12	415	0.0296	Atp1b1,Atp1b2,Atp1b3,Dnaja2,Gdi1,Gdi2,Park7,Rapgef2,Sh3bp1,Sipa1l1,Smap2,Vcp
GO:0016530	metallochaperone activity	2	8	0.0296	Park7,Trf
GO:0016861	intramolecular oxidoreductase activity, interconverting aldoses and ketoses	2	8	0.0296	Mpi,Tpi1
GO:0030235	nitric-oxide synthase regulator activity	2	8	0.0296	Dynll1,Hsp90ab1
GO:0033691	sialic acid binding	2	8	0.0296	L1cam,Mag
GO:0050750	low-density lipoprotein particle receptor binding	3	28	0.0296	Ap2a1,Ap2m1,Cltc
GO:0051117	ATPase binding	5	91	0.0296	Actr3,Atp1b1,Atp1b2,Atp1b3,Rac1
GO:0016667	oxidoreductase activity, acting on a sulfur group of donors	4	58	0.0308	Dld,Glrx5,P4hb,Selenbp1
GO:0017016	Ras GTPase binding	11	372	0.0332	Ap1g1,Dmxl2,Gdi1,Itpka,Kpnb1,Nsf,Rab7,Rac1,Rapgef2,Rims1,Trio
GO:0035615	clathrin adaptor activity	2	9	0.0333	Ap2a1,Ap2a2
GO:0015078	proton transmembrane transporter activity	5	99	0.0384	Atp5e,Atp5o,Atp6v1c1,Gm10221,Slc32a1
GO:0003730	mRNA 3'-UTR binding	4	63	0.0388	Hnrnpl,Khsrp,Pabpc1,Tardbp
GO:1990405	protein antigen binding	2	10	0.0388	Ppp2ca,Ppp2r1a
GO:0036002	pre-mRNA binding	3	33	0.0403	Celf4,Hnrnpl,Ptbp2
GO:0002020	protease binding	6	142	0.0406	Aldoa,Cltc,Cst3,Park7,Serpinb6a,Vcp
GO:0015079	potassium ion transmembrane transporter activity	6	142	0.0406	Atp1a2,Atp1a3,Atp1b1,Atp1b2,Atp1b3,Kcnab2
GO:0043008	ATP-dependent protein binding	2	11	0.0442	Hsp90ab1,Nsf
GO:0046933	proton-transporting ATP synthase activity, rotational mechanism	2	11	0.0442	Atp5e,Atp5o
GO:0051920	peroxiredoxin activity	2	11	0.0442	Park7,Prdx5
GO:0003723	RNA binding	21	986	0.0479	Actn1,Celf4,Cltc,Cnp,Eef1a1,Eef1a2,Eef1g,Eif3c,Eif3f,Hdlbp,Hnrnpl,Hsp90ab1,Hspa8,Khsrp,Pabpc1,Park7,Pcbp2,Ptbp2,Rpl23,Ssb,Tardbp
GO:0000287	magnesium ion binding	7	194	0.0481	Atp8a2,Idh3g,Nudt3,Pgp,Pkm,Prps1,Sh3bp1
GO:0017137	Rab GTPase binding	6	150	0.0498	Ap1g1,Dmxl2,Gdi1,Nsf,Rac1,Rims1

## Sheet: S9
	S9. Table S9 The KEGG Pathways Associated with the Differentially Expressed Proteins in the AD+SMC/AD Group.
	Se-methylselenocysteine (SMC) Improves Cognitive Deficits by Attenuating Synaptic and Metabolic Abnormalities in Alzheimer's Mice Model: A Proteomic Study Xiubo Du1#, Qingqing Shi1#, Yuxi Zhao1, Yongli Xie1, Xuexia Li1, Qiong Liu1, Javed Iqbal1, Huajie Zhang1,2, Xukun Liu1,3, Liming Shen1* 1Shenzhen Key Laboratory of Marine Biotechnology and Ecology, College of Life Science and Oceanography, Shen…
#term ID	Term description	Observed gene count	Background gene count	False discovery rate	Matching proteins
mmu01200	Carbon metabolism	23	118	3.31e-17	Adh5,Aldoa,Cs,Dlat,Dld,Echs1,Glud1,Got2,Hk1,Idh3g,Mdh2,Ogdh,Pcca,Pdha1,Pfkl,Pfkp,Pgam1,Pgp,Pkm,Prps1,Sdha,Suclg1,Tpi1
mmu04961	Endocrine and other factor-regulated calcium reabsorption	15	54	4.39e-13	Ap2a1,Ap2a2,Ap2b1,Ap2m1,Ap2s1,Atp1a2,Atp1a3,Atp1b1,Atp1b2,Atp1b3,Atp2b1,Cltc,Dnm1,Prkcg,Slc8a1
mmu01100	Metabolic pathways	50	1296	8.61e-11	Abat,Acaa1a,Acly,Adh5,Adssl1,Aldh5a1,Aldoa,Ass1,Atp5e,Atp5o,Atp6v1b2,Atp6v1c1,Cbr1,Cbr3,Ckmt1,Cs,Dlat,Dld,Echs1,Fah,Fasn,Gad2,Glud1,Gm10221,Got2,Hk1,Idh3g,Itpka,Mdh2,Mpi,Ndufb7,Ndufb8,Ndufs8,Ndufv1,Oat,Ogdh,Pcca,Pdha1,Pfkl,Pfkp,Pgam1,Pgp,Pkm,Prps1,Qdpr,Sdha,Suclg1,Tpi1,Uqcrc1,Uqcrh
mmu04721	Synaptic vesicle cycle	13	62	3.38e-10	Ap2a1,Ap2a2,Ap2b1,Ap2m1,Ap2s1,Atp6v1b2,Atp6v1c1,Cltc,Cplx1,Dnm1,Nsf,Rims1,Slc32a1
mmu00020	Citrate cycle (TCA cycle)	10	32	2.75e-09	Acly,Cs,Dlat,Dld,Idh3g,Mdh2,Ogdh,Pdha1,Sdha,Suclg1
mmu05012	Parkinson's disease	15	138	2.09e-08	Atp5e,Atp5o,Gnai2,Ndufb7,Ndufb8,Ndufs8,Ndufv1,Park7,Sdha,Sept5,Slc25a5,Uba1,Uchl1,Uqcrc1,Uqcrh
mmu05016	Huntington's disease	17	187	2.09e-08	Ap2a1,Ap2a2,Ap2b1,Ap2m1,Ap2s1,Atp5e,Atp5o,Cltc,Dctn1,Ndufb7,Ndufb8,Ndufs8,Ndufv1,Sdha,Slc25a5,Uqcrc1,Uqcrh
mmu00010	Glycolysis / Gluconeogenesis	11	65	5.49e-08	Adh5,Aldoa,Dlat,Dld,Hk1,Pdha1,Pfkl,Pfkp,Pgam1,Pkm,Tpi1
mmu01230	Biosynthesis of amino acids	11	75	1.87e-07	Aldoa,Ass1,Cs,Got2,Idh3g,Pfkl,Pfkp,Pgam1,Pkm,Prps1,Tpi1
mmu04261	Adrenergic signaling in cardiomyocytes	13	140	1.1e-06	Atp1a2,Atp1a3,Atp1b1,Atp1b2,Atp1b3,Atp2a2,Atp2b1,Atp2b2,Gnai2,Ppp1cb,Ppp2ca,Ppp2r1a,Slc8a1
mmu00190	Oxidative phosphorylation	12	129	3.24e-06	Atp5e,Atp5o,Atp6v1b2,Atp6v1c1,Gm10221,Ndufb7,Ndufb8,Ndufs8,Ndufv1,Sdha,Uqcrc1,Uqcrh
mmu04978	Mineral absorption	8	44	3.75e-06	Atp1a2,Atp1a3,Atp1b1,Atp1b2,Atp1b3,Atp2b1,Slc8a1,Trf
mmu04022	cGMP-PKG signaling pathway	13	164	4.64e-06	Atp1a2,Atp1a3,Atp1b1,Atp1b2,Atp1b3,Atp2a2,Atp2b1,Atp2b2,Gnai2,Ppp1cb,Ppp3r1,Slc25a5,Slc8a1
mmu04144	Endocytosis	16	258	4.64e-06	Ap2a1,Ap2a2,Ap2b1,Ap2m1,Ap2s1,Arpc1a,Capzb,Cdc42,Cltc,Dnajc6,Dnm1,Eea1,Hspa1b,Hspa8,Rab7,Smap2
mmu00250	Alanine, aspartate and glutamate metabolism	7	36	1.19e-05	Abat,Adssl1,Aldh5a1,Ass1,Gad2,Glud1,Got2
mmu04260	Cardiac muscle contraction	9	75	1.19e-05	Atp1a2,Atp1a3,Atp1b1,Atp1b2,Atp1b3,Atp2a2,Slc8a1,Uqcrc1,Uqcrh
mmu04964	Proximal tubule bicarbonate reclamation	6	22	1.19e-05	Atp1a2,Atp1a3,Atp1b1,Atp1b2,Atp1b3,Glud1
mmu04970	Salivary secretion	9	75	1.19e-05	Atp1a2,Atp1a3,Atp1b1,Atp1b2,Atp1b3,Atp2b1,Atp2b2,Cst3,Prkcg
mmu04972	Pancreatic secretion	10	101	1.22e-05	Atp1a2,Atp1a3,Atp1b1,Atp1b2,Atp1b3,Atp2a2,Atp2b1,Atp2b2,Prkcg,Rac1
mmu05010	Alzheimer's disease	12	167	2.31e-05	Atp2a2,Atp5e,Atp5o,Capn2,Ndufb7,Ndufb8,Ndufs8,Ndufv1,Ppp3r1,Sdha,Uqcrc1,Uqcrh
mmu04723	Retrograde endocannabinoid signaling	11	145	3.61e-05	Gnai2,Gnao1,Gng3,Gria3,Ndufb7,Ndufb8,Ndufs8,Ndufv1,Prkcg,Rims1,Slc32a1
mmu05100	Bacterial invasion of epithelial cells	8	74	7.08e-05	Arpc1a,Cdc42,Cltc,Dnm1,Elmo2,Rac1,Sept3,Sept6
mmu04024	cAMP signaling pathway	12	194	8.53e-05	Atp1a2,Atp1a3,Atp1b1,Atp1b2,Atp1b3,Atp2a2,Atp2b1,Atp2b2,Gnai2,Gria3,Ppp1cb,Rac1
mmu00051	Fructose and mannose metabolism	6	35	8.87e-05	Aldoa,Hk1,Mpi,Pfkl,Pfkp,Tpi1
mmu04530	Tight junction	11	165	9.62e-05	Actn1,Actr3,Cdc42,Hspa4,Ppp2ca,Ppp2r1a,Rac1,Rapgef2,Synpo,Tuba4a,Tuba8
mmu04960	Aldosterone-regulated sodium reabsorption	6	38	0.00012	Atp1a2,Atp1a3,Atp1b1,Atp1b2,Atp1b3,Prkcg
mmu04730	Long-term depression	7	60	0.00014	Gnai2,Gnao1,Gnaz,Gria3,Ppp2ca,Ppp2r1a,Prkcg
mmu04973	Carbohydrate digestion and absorption	6	40	0.00015	Atp1a2,Atp1a3,Atp1b1,Atp1b2,Atp1b3,Hk1
mmu04727	GABAergic synapse	8	87	0.00016	Abat,Gad2,Gnai2,Gnao1,Gng3,Nsf,Prkcg,Slc32a1
mmu04925	Aldosterone synthesis and secretion	8	97	0.00032	Atp1a2,Atp1a3,Atp1b1,Atp1b2,Atp1b3,Atp2b1,Atp2b2,Prkcg
mmu04971	Gastric acid secretion	7	72	0.00036	Atp1a2,Atp1a3,Atp1b1,Atp1b2,Atp1b3,Gnai2,Prkcg
mmu00630	Glyoxylate and dicarboxylate metabolism	5	29	0.00037	Cs,Dld,Mdh2,Pcca,Pgp
mmu04145	Phagosome	10	165	0.00039	Atp6v1b2,Atp6v1c1,Coro1a,Dync1h1,Eea1,Rab7,Rac1,Tuba4a,Tuba8,Tubb3
mmu00640	Propanoate metabolism	5	31	0.00046	Abat,Dld,Echs1,Pcca,Suclg1
mmu05134	Legionellosis	6	57	0.00073	Eef1a1,Eef1a2,Eef1g,Hspa1b,Hspa8,Vcp
mmu04932	Non-alcoholic fatty liver disease (NAFLD)	9	146	0.00075	Cdc42,Ndufb7,Ndufb8,Ndufs8,Ndufv1,Rac1,Sdha,Uqcrc1,Uqcrh
mmu04919	Thyroid hormone signaling pathway	8	115	0.00079	Atp1a2,Atp1a3,Atp1b1,Atp1b2,Atp1b3,Atp2a2,Pfkp,Prkcg
mmu04714	Thermogenesis	11	223	0.00085	Atp5e,Atp5o,Gm10221,Ndufb7,Ndufb8,Ndufs8,Ndufv1,Sdha,Smarcc2,Uqcrc1,Uqcrh
mmu00620	Pyruvate metabolism	5	38	0.00096	Dlat,Dld,Mdh2,Pdha1,Pkm
mmu05230	Central carbon metabolism in cancer	6	64	0.0012	Hk1,Pdha1,Pfkl,Pfkp,Pgam1,Pkm
mmu04141	Protein processing in endoplasmic reticulum	9	161	0.0013	Capn2,Dnaja2,Hsp90ab1,Hspa1b,Hspa4l,Hspa8,Hsph1,P4hb,Vcp
mmu04728	Dopaminergic synapse	8	129	0.0015	Gnai2,Gnao1,Gng3,Gria3,Ppp1cb,Ppp2ca,Ppp2r1a,Prkcg
mmu04962	Vasopressin-regulated water reabsorption	5	43	0.0015	Dctn1,Dync1h1,Dynll1,Dynll2,Nsf
mmu04918	Thyroid hormone synthesis	6	73	0.002	Atp1a2,Atp1a3,Atp1b1,Atp1b2,Atp1b3,Prkcg
mmu00650	Butanoate metabolism	4	27	0.0026	Abat,Aldh5a1,Echs1,Gad2
mmu05132	Salmonella infection	6	78	0.0027	Arpc1a,Cdc42,Dync1h1,Pfn2,Rab7,Rac1
mmu04724	Glutamatergic synapse	7	113	0.0032	Gnai2,Gnao1,Gng3,Gria3,Ppp3r1,Prkcg,Slc1a2
mmu04666	Fc gamma R-mediated phagocytosis	6	83	0.0035	Arpc1a,Cdc42,Cfl1,Cfl2,Prkcg,Rac1
mmu00280	Valine, leucine and isoleucine degradation	5	55	0.0037	Abat,Acaa1a,Dld,Echs1,Pcca
mmu04911	Insulin secretion	6	85	0.0038	Atp1a2,Atp1a3,Atp1b1,Atp1b2,Atp1b3,Prkcg
mmu00030	Pentose phosphate pathway	4	32	0.004	Aldoa,Pfkl,Pfkp,Prps1
mmu04974	Protein digestion and absorption	6	90	0.0048	Atp1a2,Atp1a3,Atp1b1,Atp1b2,Atp1b3,Slc8a1
mmu04810	Regulation of actin cytoskeleton	9	208	0.0059	Actn1,Arpc1a,Cdc42,Cfl1,Cfl2,Pfn2,Ppp1cb,Rac1,Tmsb4x
mmu04360	Axon guidance	8	174	0.0073	Cdc42,Cfl1,Cfl2,Dpysl2,Gnai2,L1cam,Ppp3r1,Rac1
mmu04066	HIF-1 signaling pathway	6	102	0.0084	Aldoa,Hk1,Pdha1,Pfkl,Prkcg,Trf
mmu04020	Calcium signaling pathway	8	180	0.0086	Atp2a2,Atp2b1,Atp2b2,Itpka,Ppp3r1,Prkcg,Slc25a5,Slc8a1
mmu00220	Arginine biosynthesis	3	19	0.009	Ass1,Glud1,Got2
mmu01210	2-Oxocarboxylic acid metabolism	3	19	0.009	Cs,Got2,Idh3g
mmu04976	Bile secretion	5	71	0.009	Atp1a2,Atp1a3,Atp1b1,Atp1b2,Atp1b3
mmu04114	Oocyte meiosis	6	112	0.012	Ppp1cb,Ppp2ca,Ppp2r1a,Ppp3r1,Ywhag,Ywhaq
mmu04612	Antigen processing and presentation	5	78	0.0125	Ctsb,Hsp90ab1,Hspa1b,Hspa4,Hspa8
mmu04514	Cell adhesion molecules (CAMs)	7	158	0.0148	Cadm1,Cntnap1,Glg1,L1cam,Mag,Nfasc,Vcan
mmu04071	Sphingolipid signaling pathway	6	120	0.0157	Ctsd,Gnai2,Ppp2ca,Ppp2r1a,Prkcg,Rac1
mmu04015	Rap1 signaling pathway	8	207	0.0168	Cdc42,Gnai2,Gnao1,Pfn2,Prkcg,Rac1,Rapgef2,Sipa1l1
mmu04540	Gap junction	5	85	0.0168	Gnai2,Prkcg,Tuba4a,Tuba8,Tubb3
mmu05032	Morphine addiction	5	91	0.0214	Gnai2,Gnao1,Gng3,Prkcg,Slc32a1
mmu04915	Estrogen signaling pathway	6	131	0.0221	Ctsd,Gnai2,Gnao1,Hsp90ab1,Hspa1b,Hspa8
mmu04370	VEGF signaling pathway	4	58	0.0224	Cdc42,Ppp3r1,Prkcg,Rac1
mmu04713	Circadian entrainment	5	95	0.0243	Gnai2,Gnao1,Gng3,Gria3,Prkcg
mmu00052	Galactose metabolism	3	32	0.0277	Hk1,Pfkl,Pfkp
mmu00410	beta-Alanine metabolism	3	32	0.0277	Abat,Echs1,Gad2
mmu04922	Glucagon signaling pathway	5	99	0.0277	Pdha1,Pfkl,Pgam1,Pkm,Ppp3r1
mmu05142	Chagas disease (American trypanosomiasis)	5	101	0.0291	C1qb,Gnai2,Gnao1,Ppp2ca,Ppp2r1a
mmu00980	Metabolism of xenobiotics by cytochrome P450	4	65	0.0299	Adh5,Cbr1,Cbr3,Gstm5
mmu05031	Amphetamine addiction	4	65	0.0299	Gria3,Ppp1cb,Ppp3r1,Prkcg
mmu00350	Tyrosine metabolism	3	39	0.0421	Adh5,Fah,Got2
mmu05133	Pertussis	4	74	0.0436	C1qb,Cfl1,Cfl2,Gnai2
mmu04670	Leukocyte transendothelial migration	5	115	0.0448	Actn1,Cdc42,Gnai2,Prkcg,Rac1
